# Supplementary material for: Expanding the substrate scope of ugi five-center, four-component reaction U-5C-4CR): ketones as coupling partners for secondary amino acids
Source: PubMed Central journal article supplement (PMC3906574; doi:10.1007/s11030-013-9488-0), 2013-10-24

## **NMR spectra of synthesized compounds**

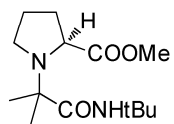

**1a**

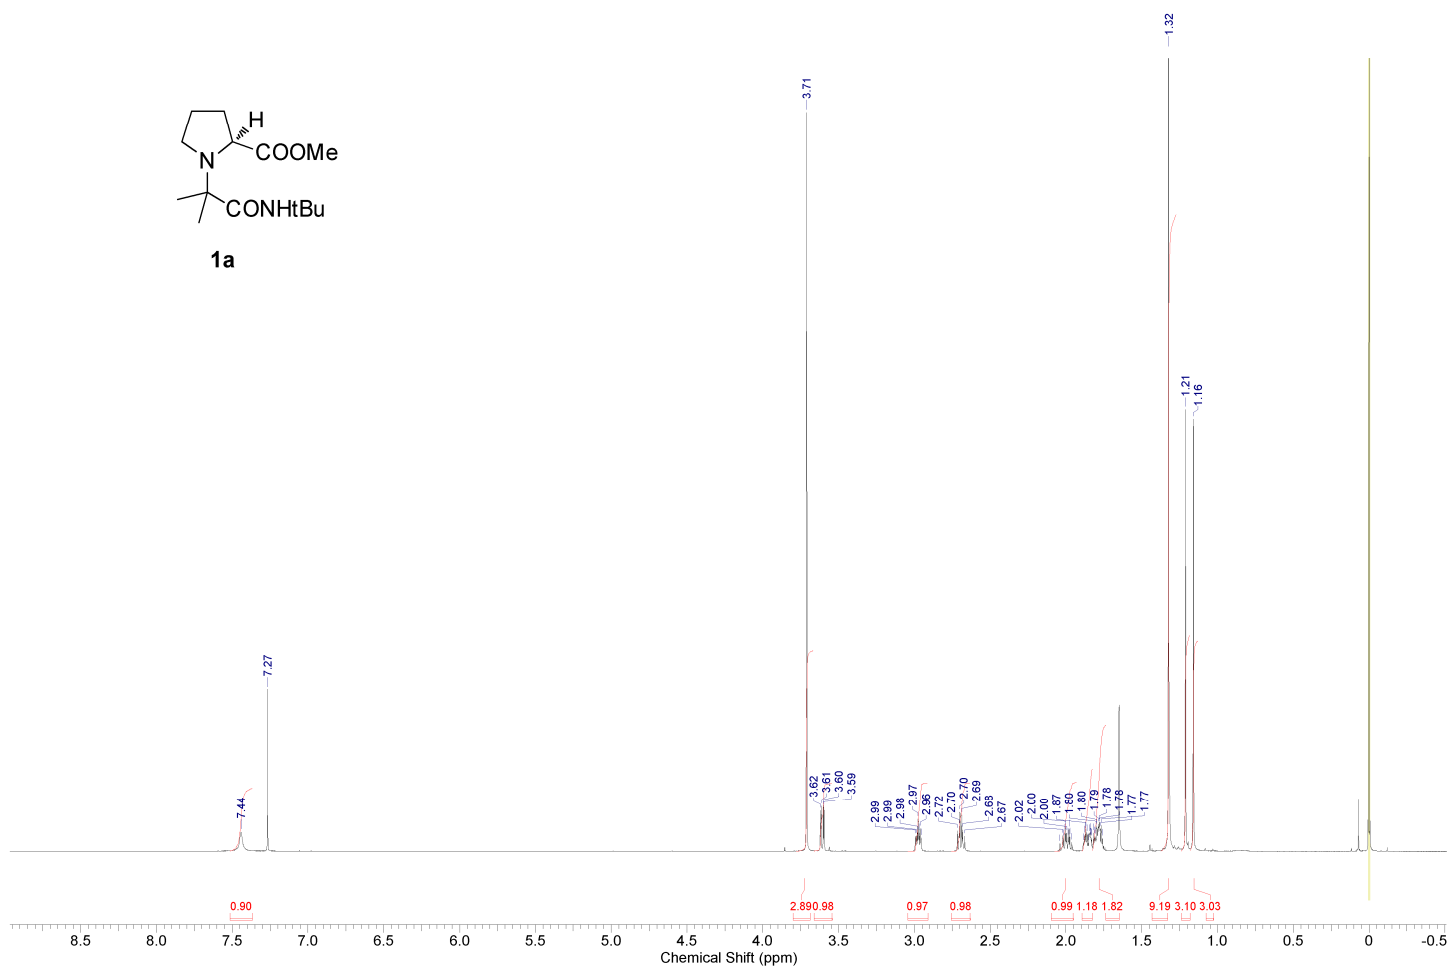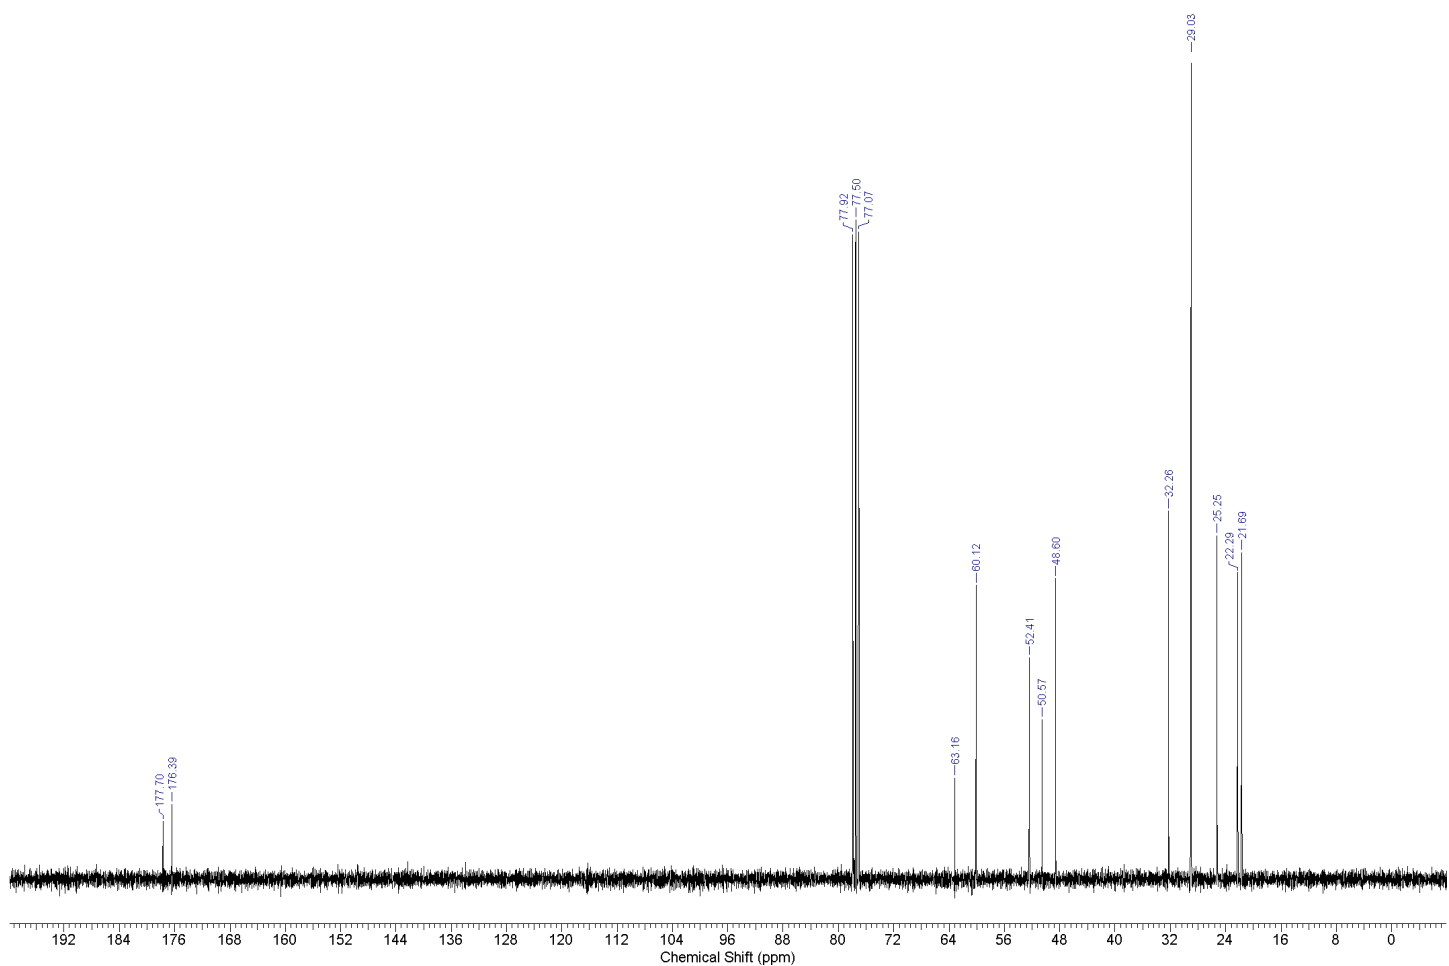

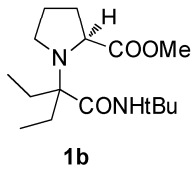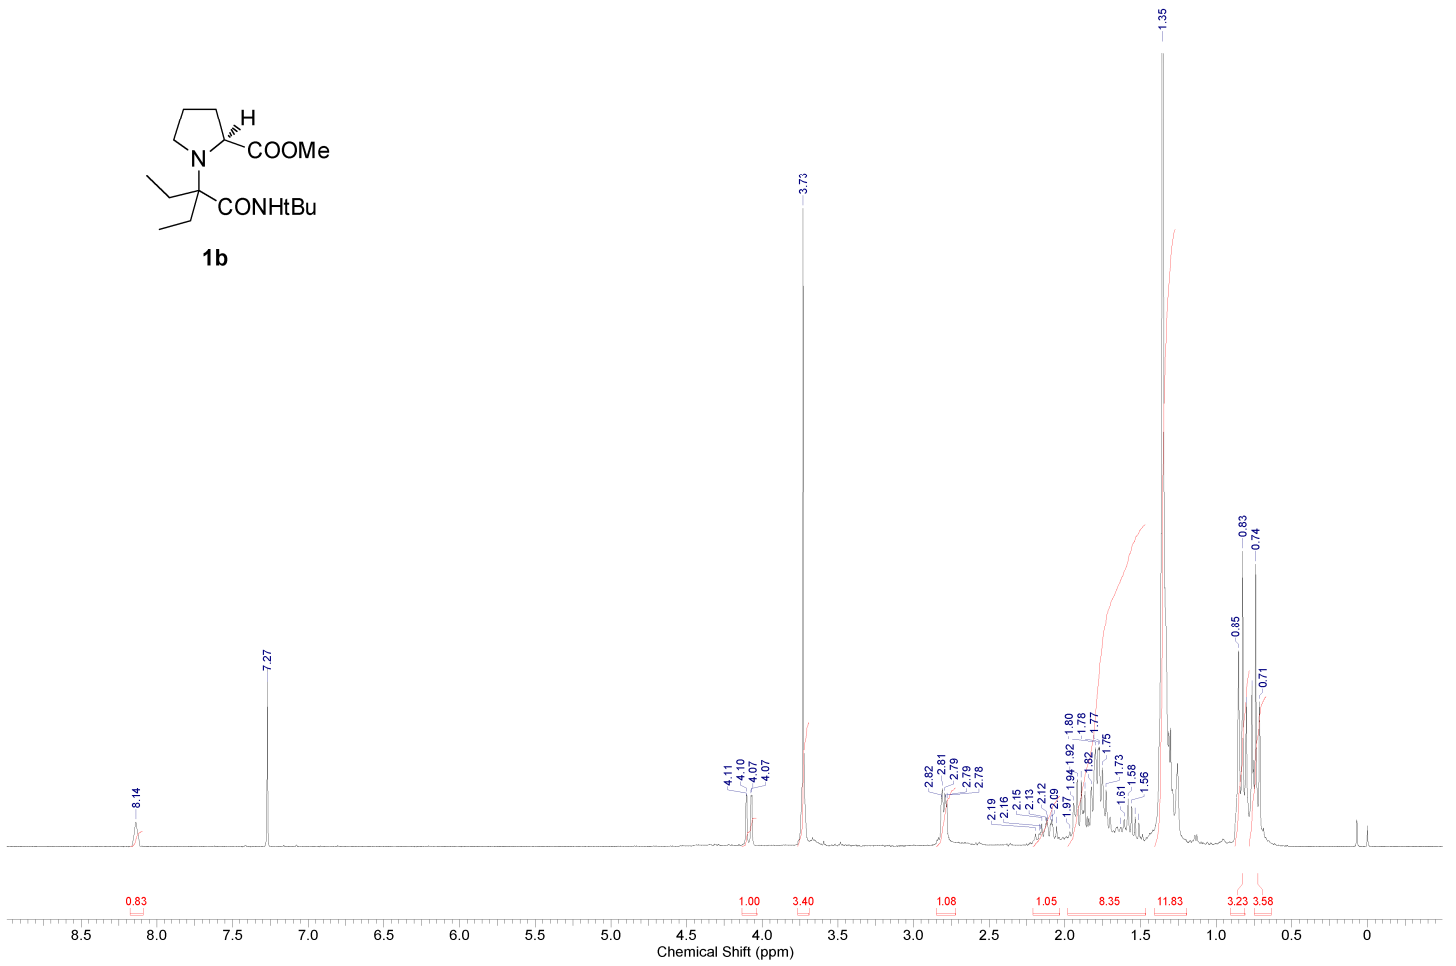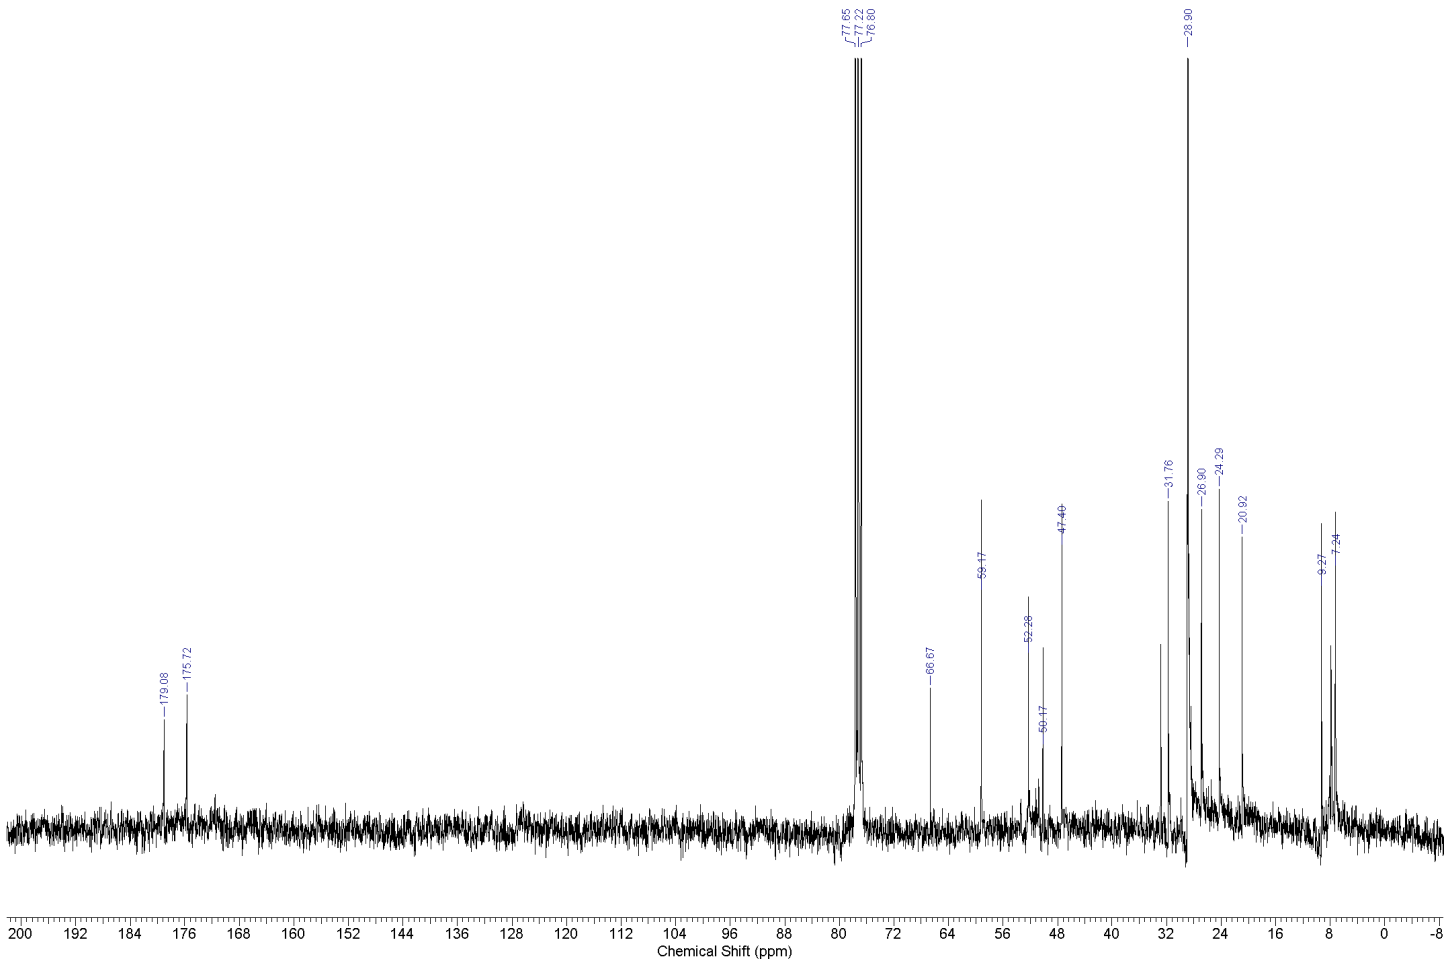

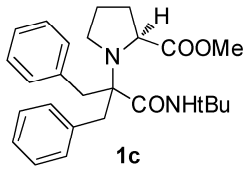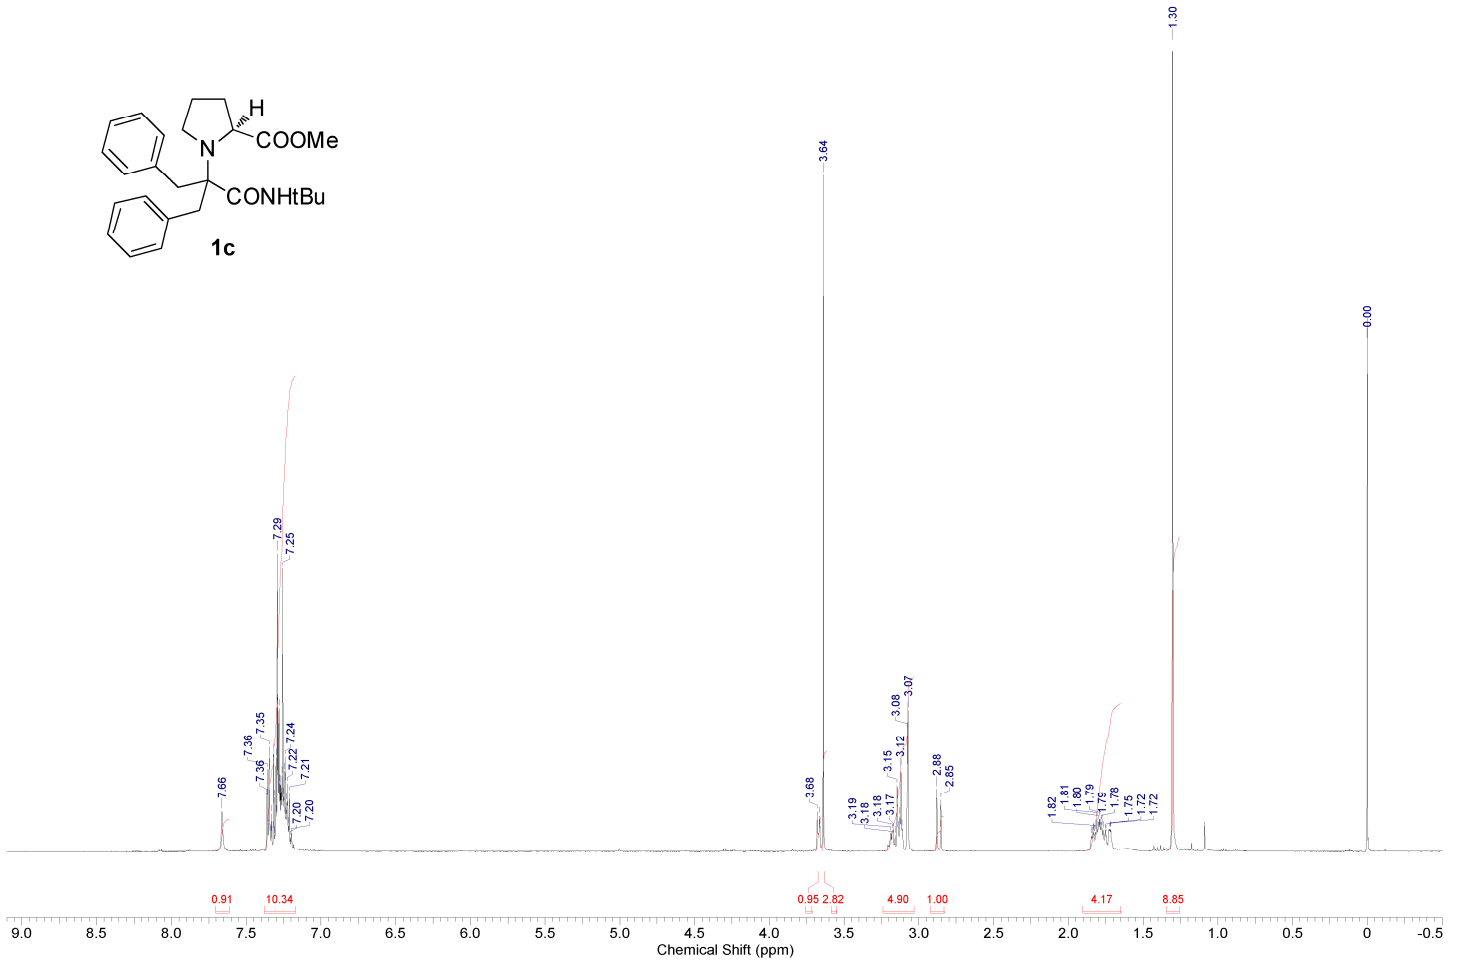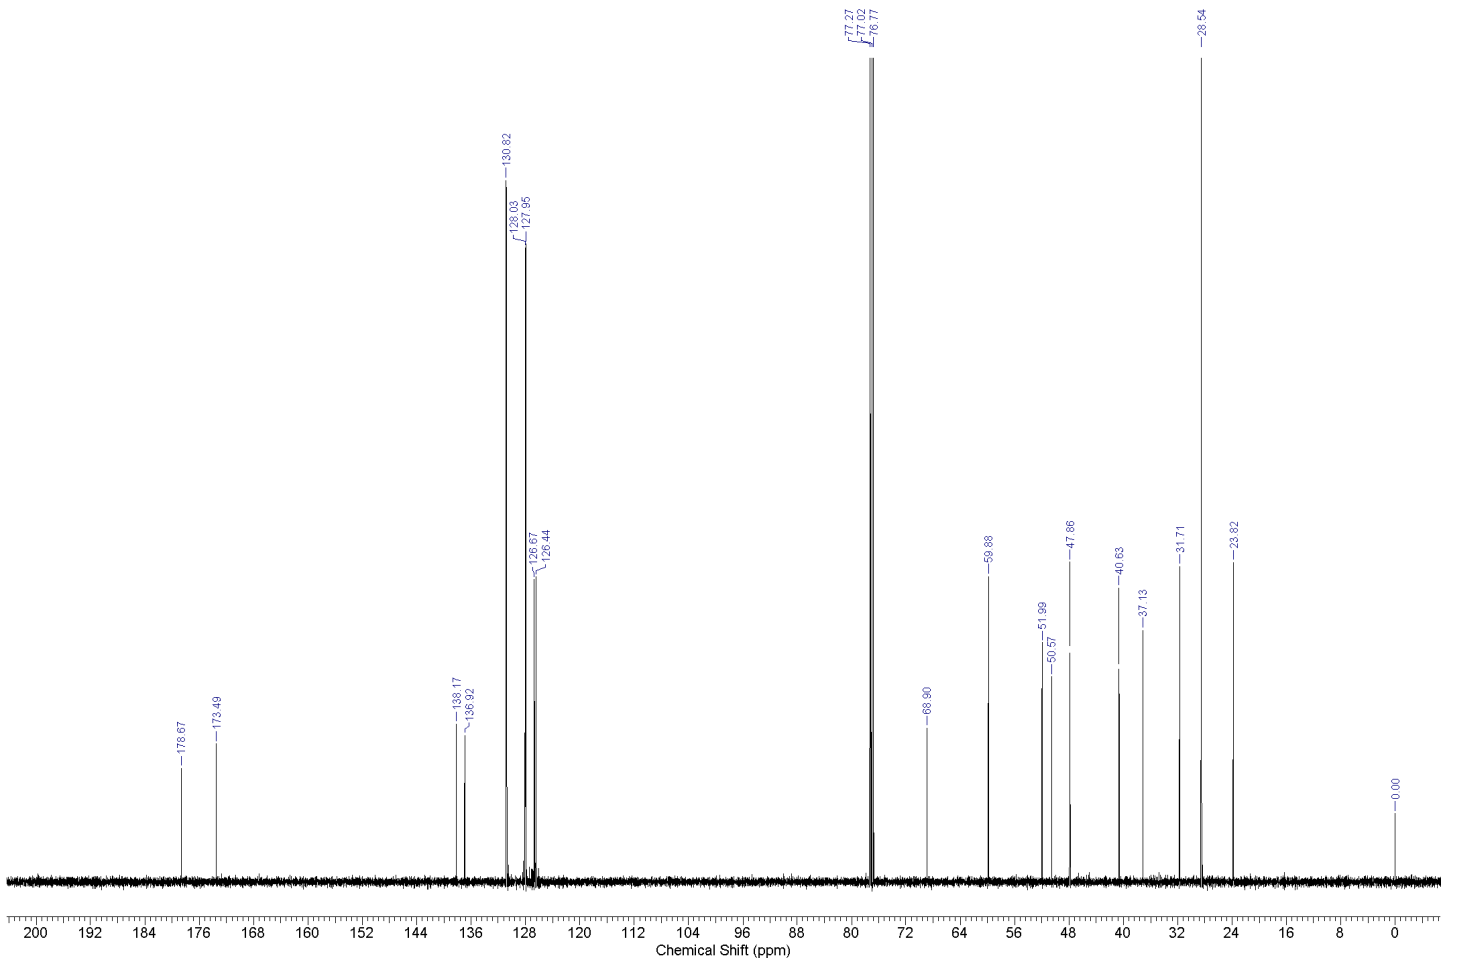

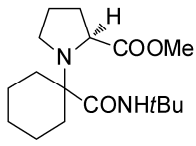

1e

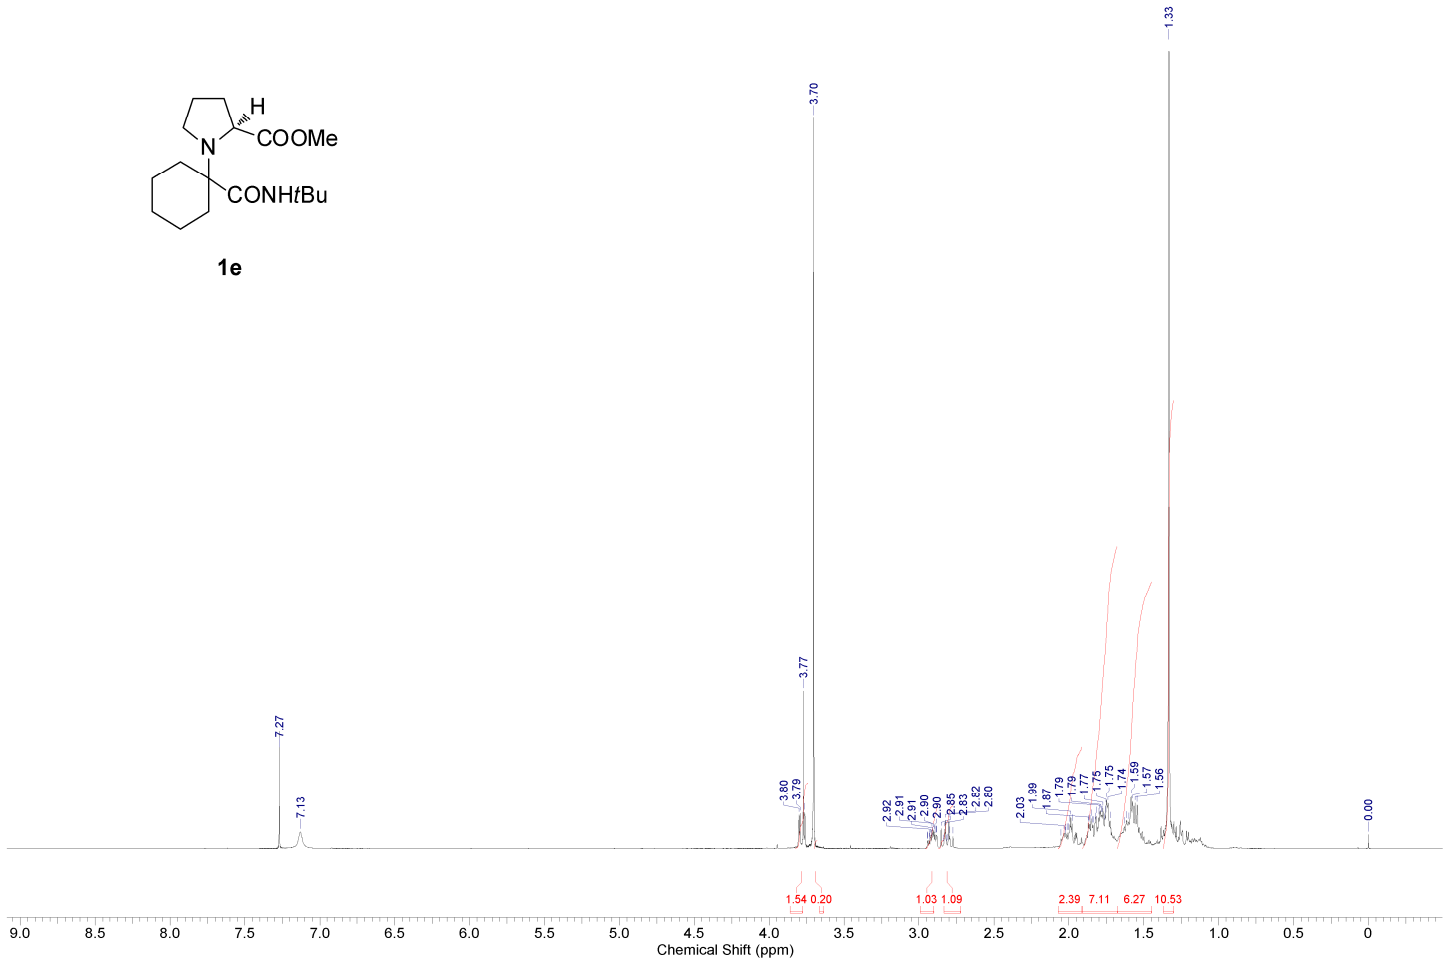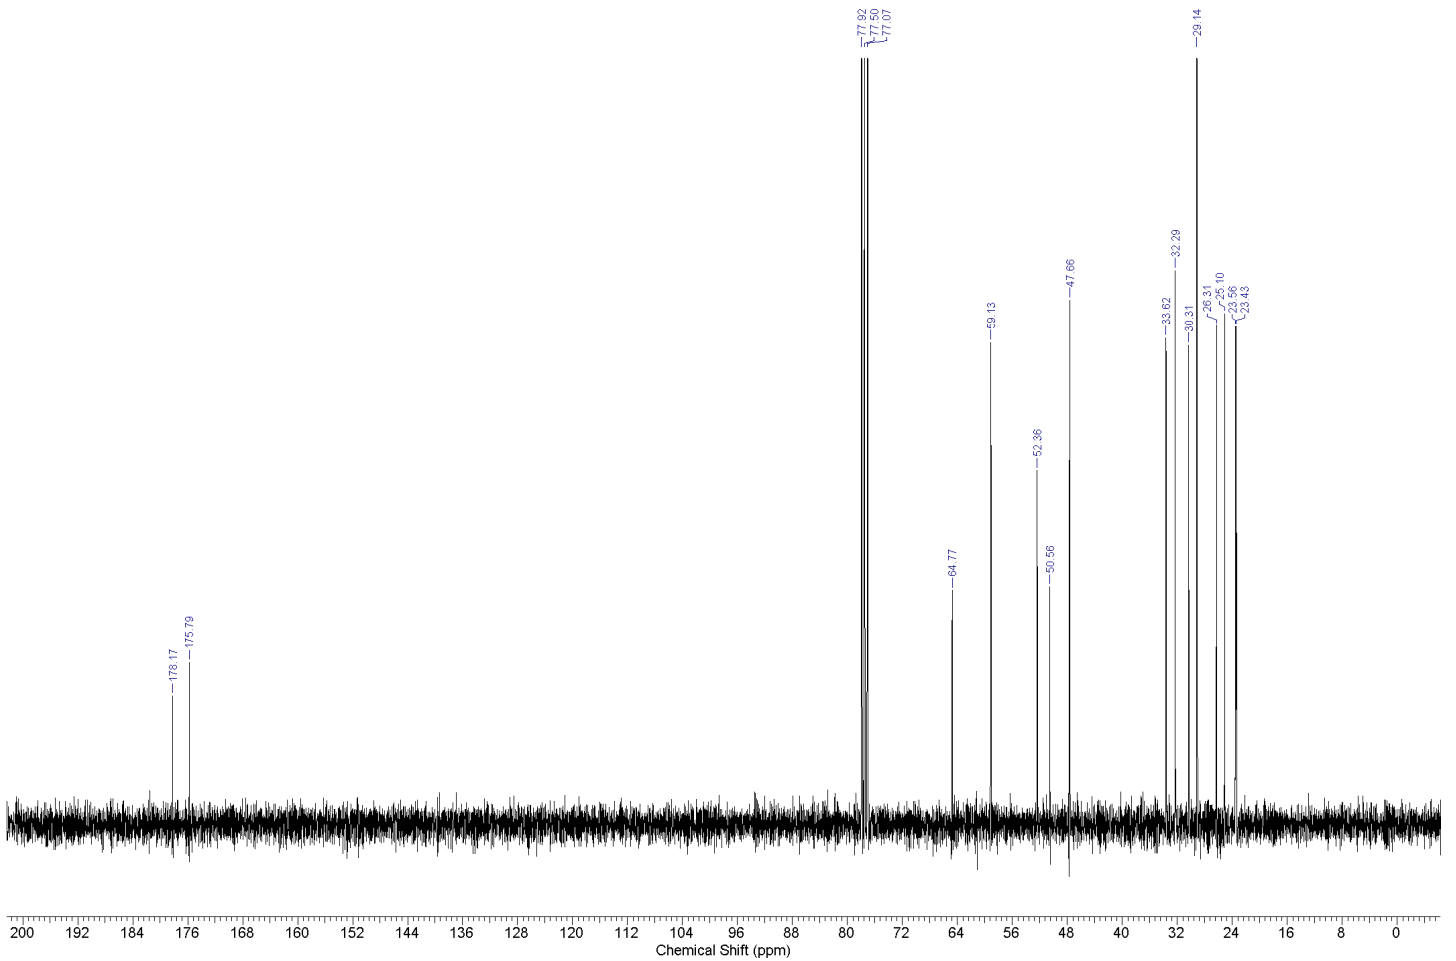

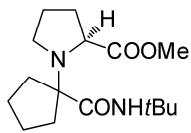

1f

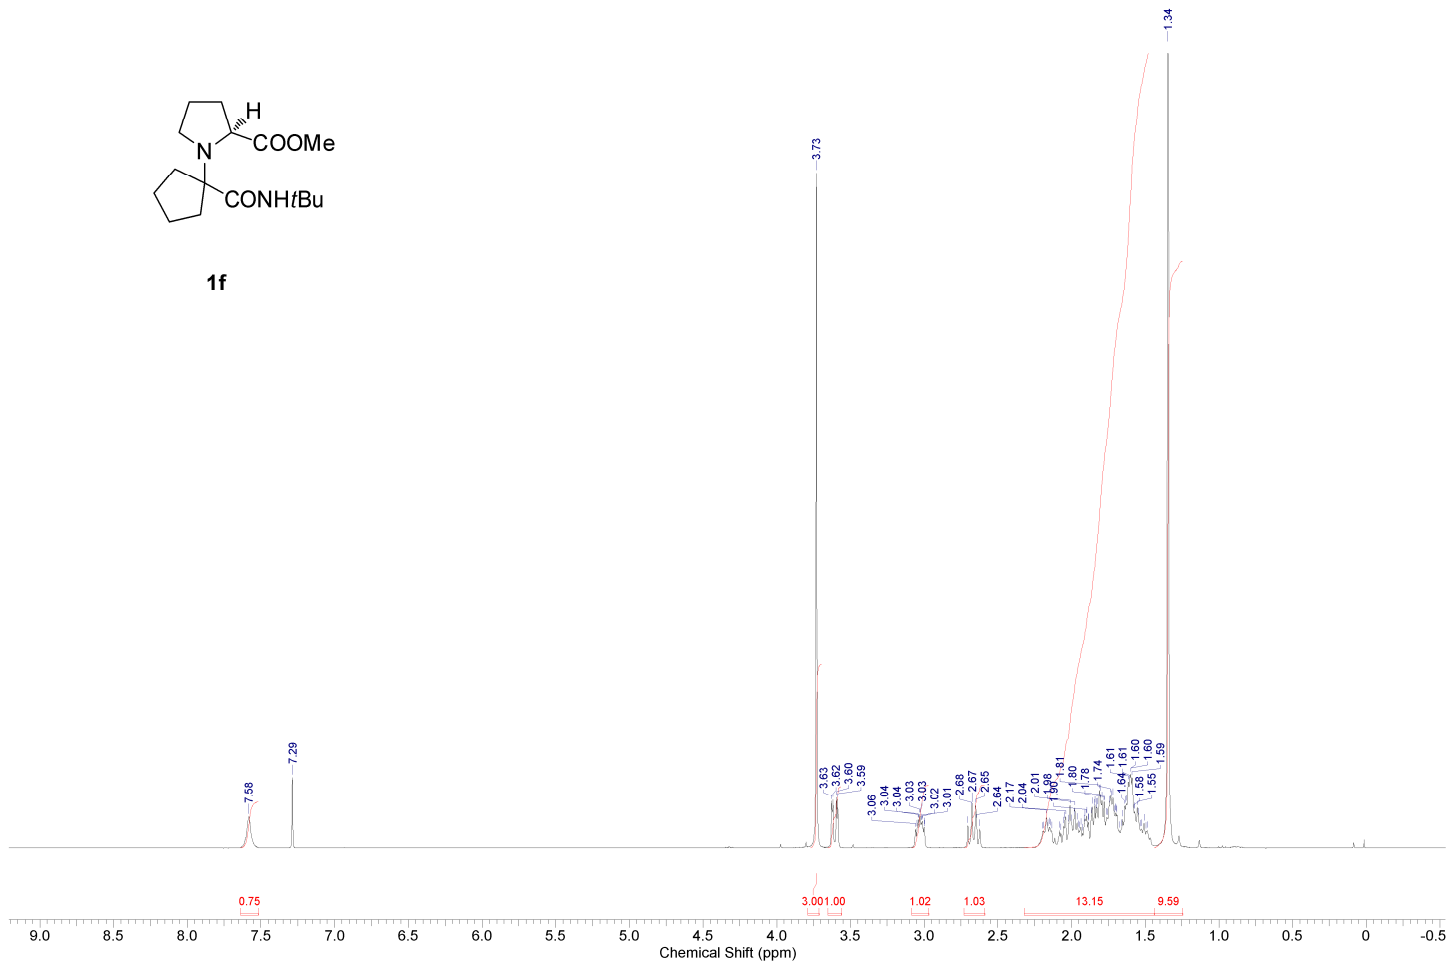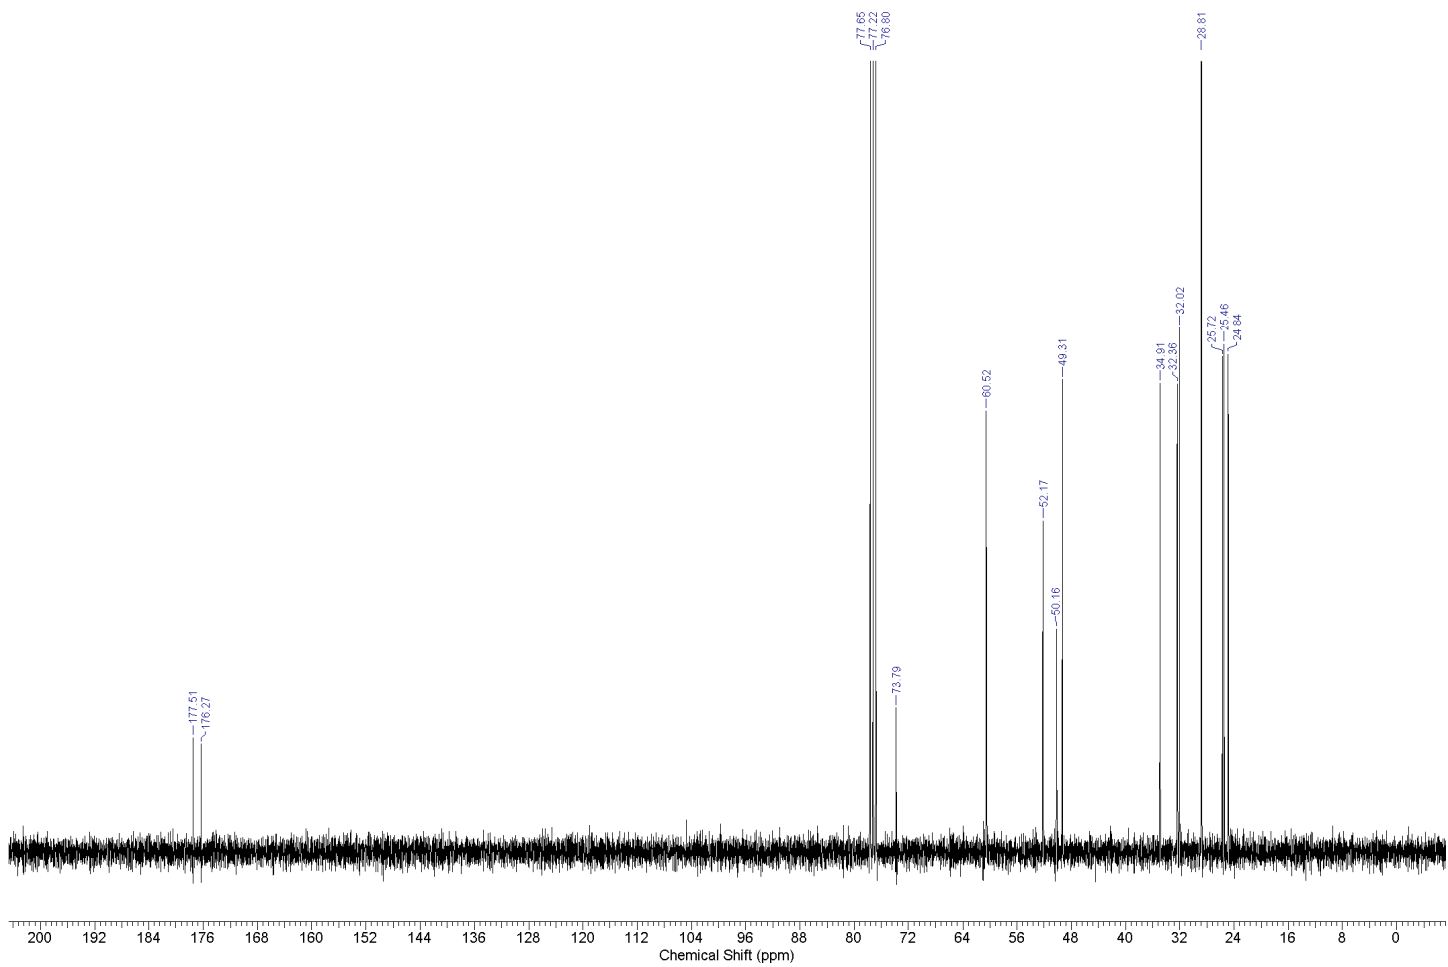

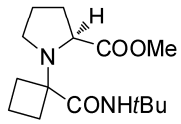

**1g**

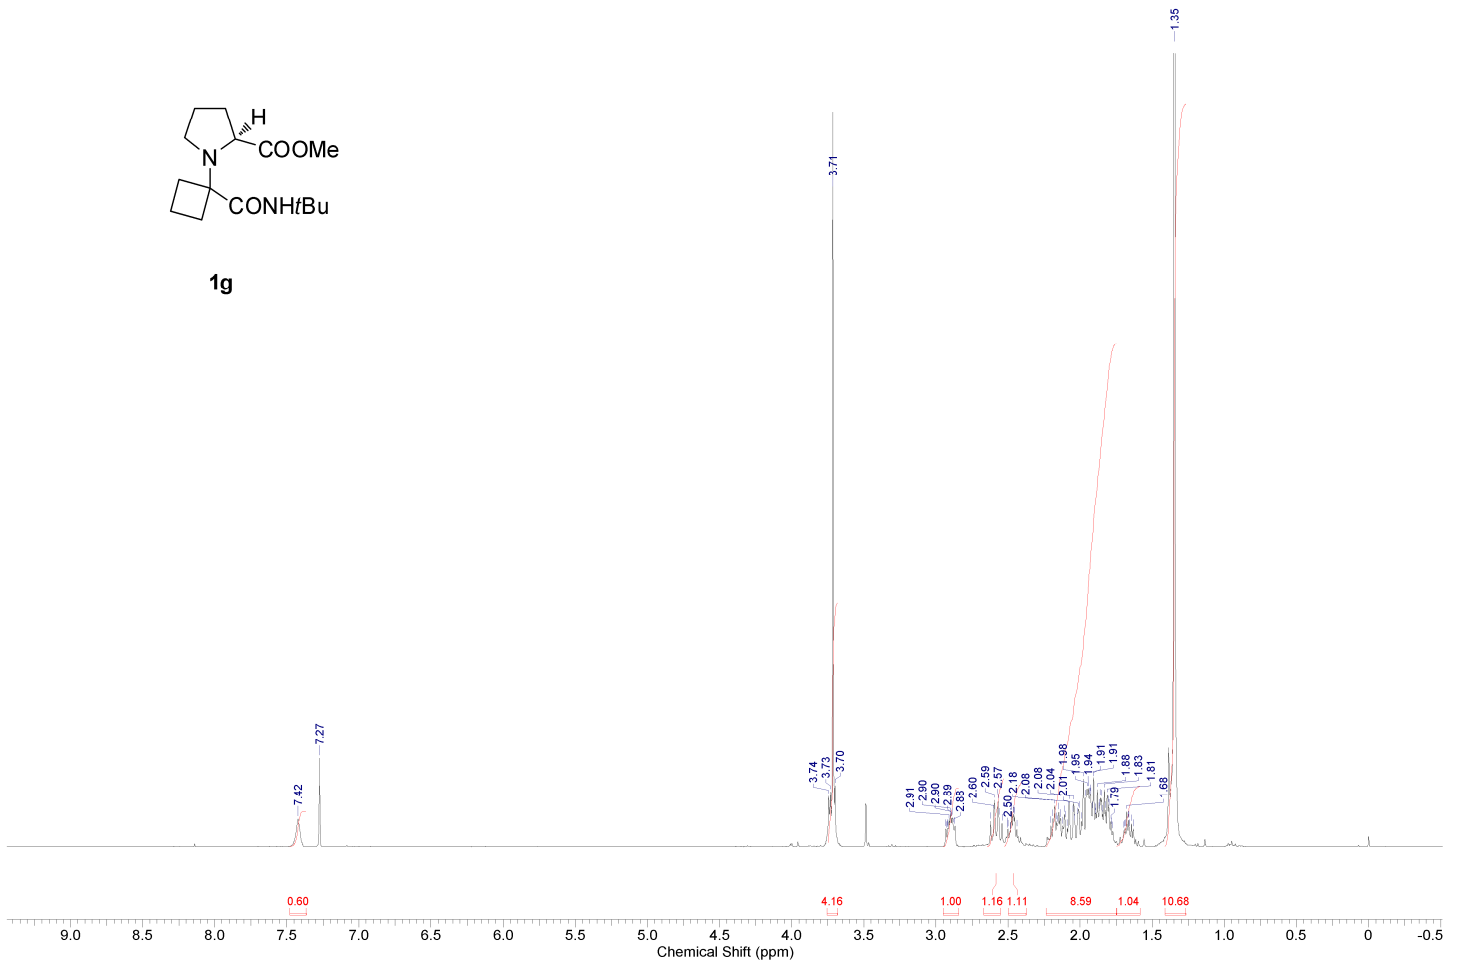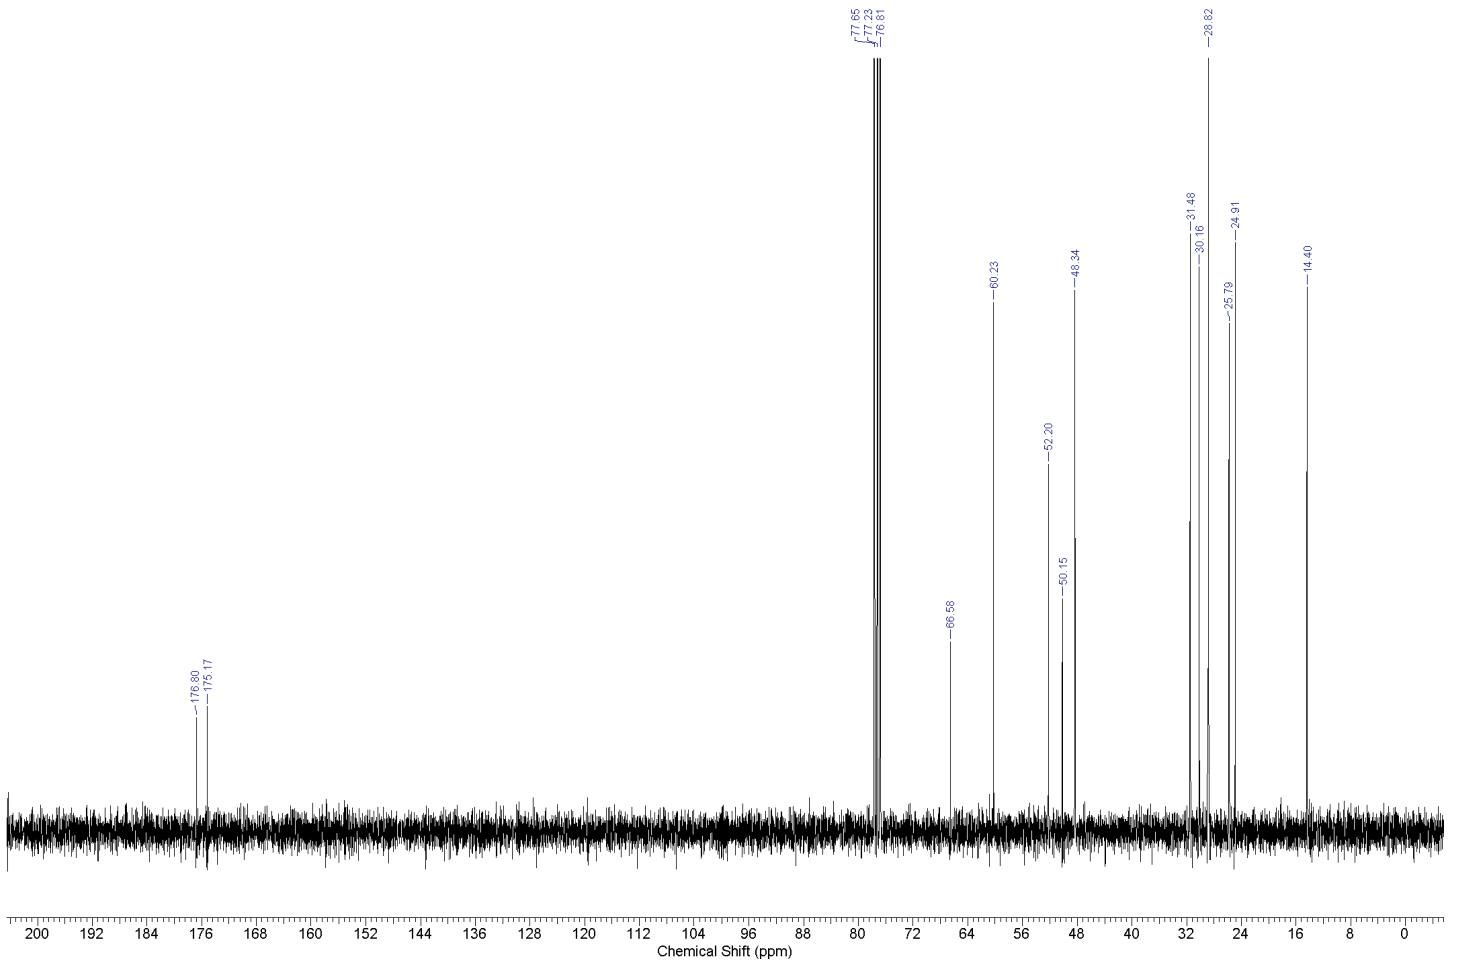

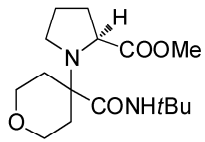

**1h**

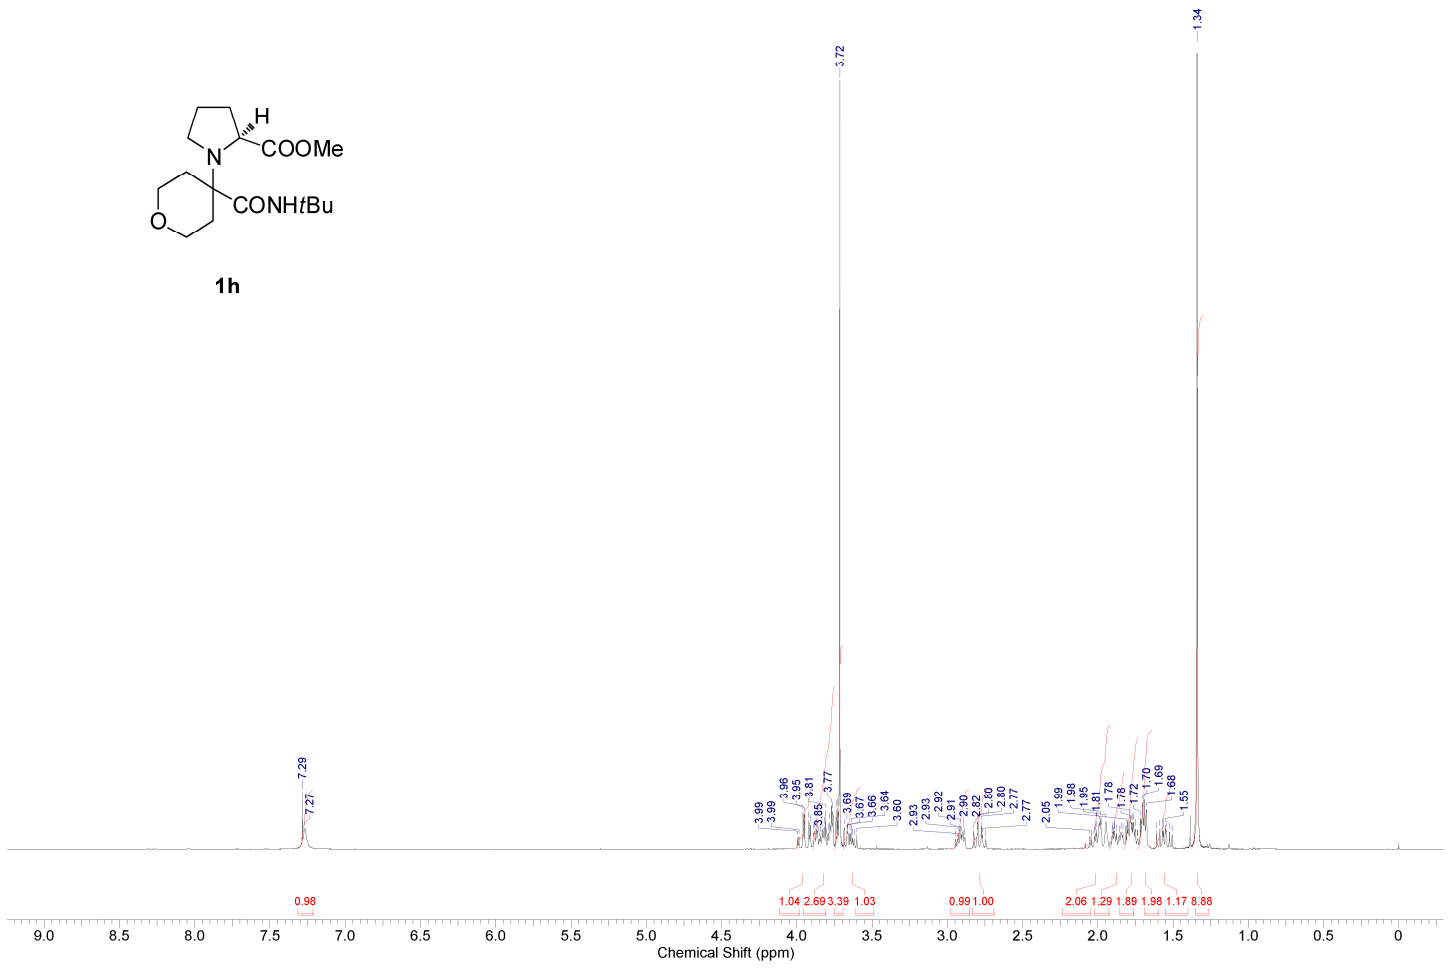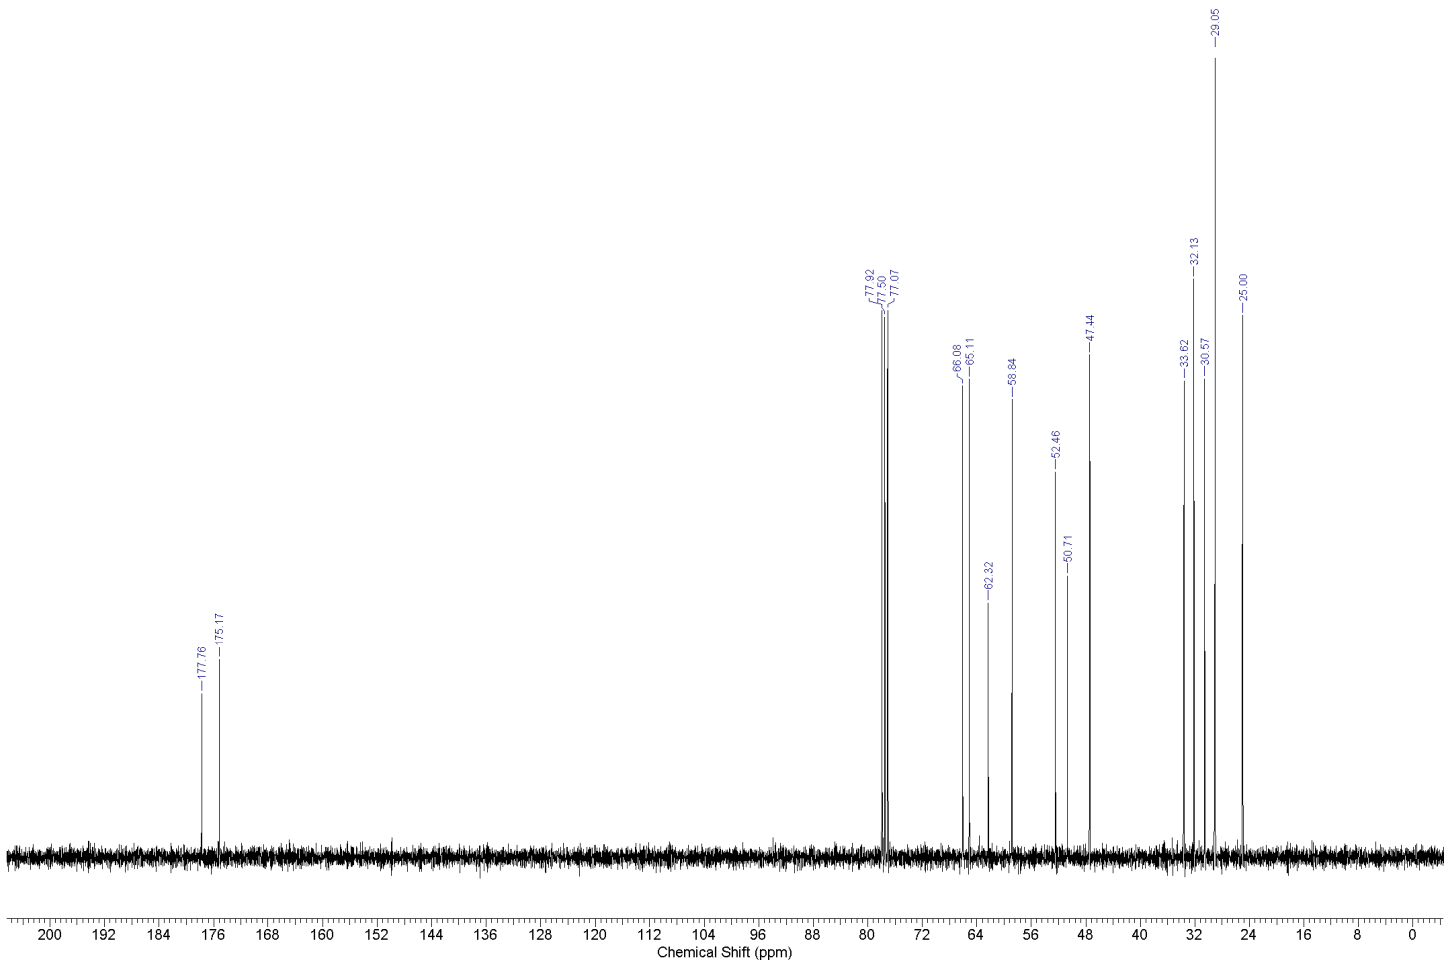



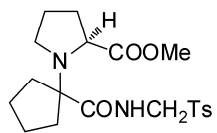

**1i**

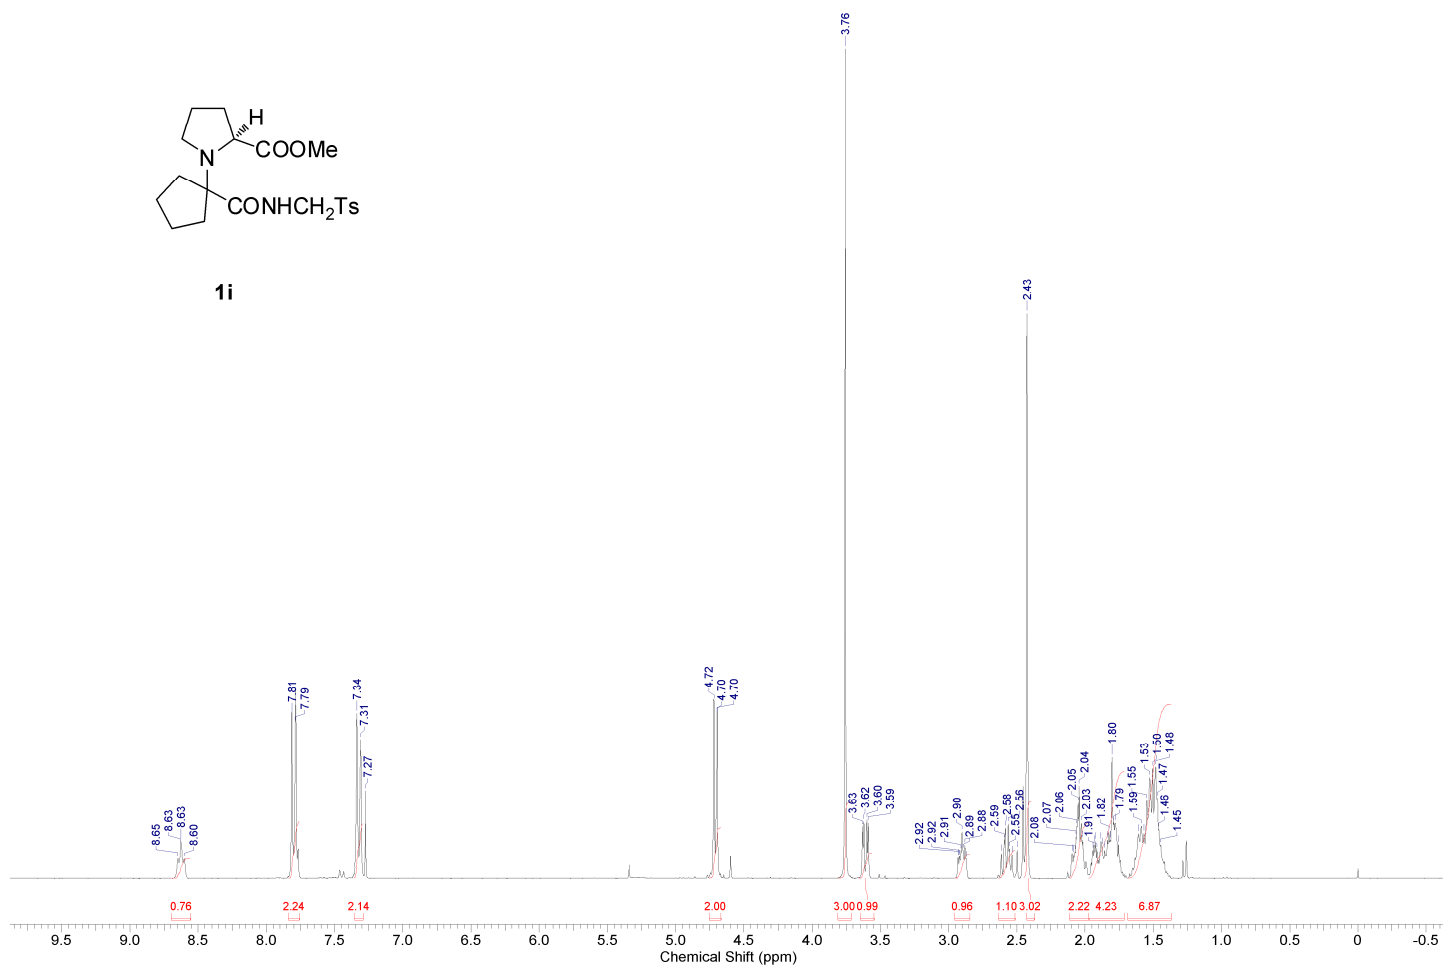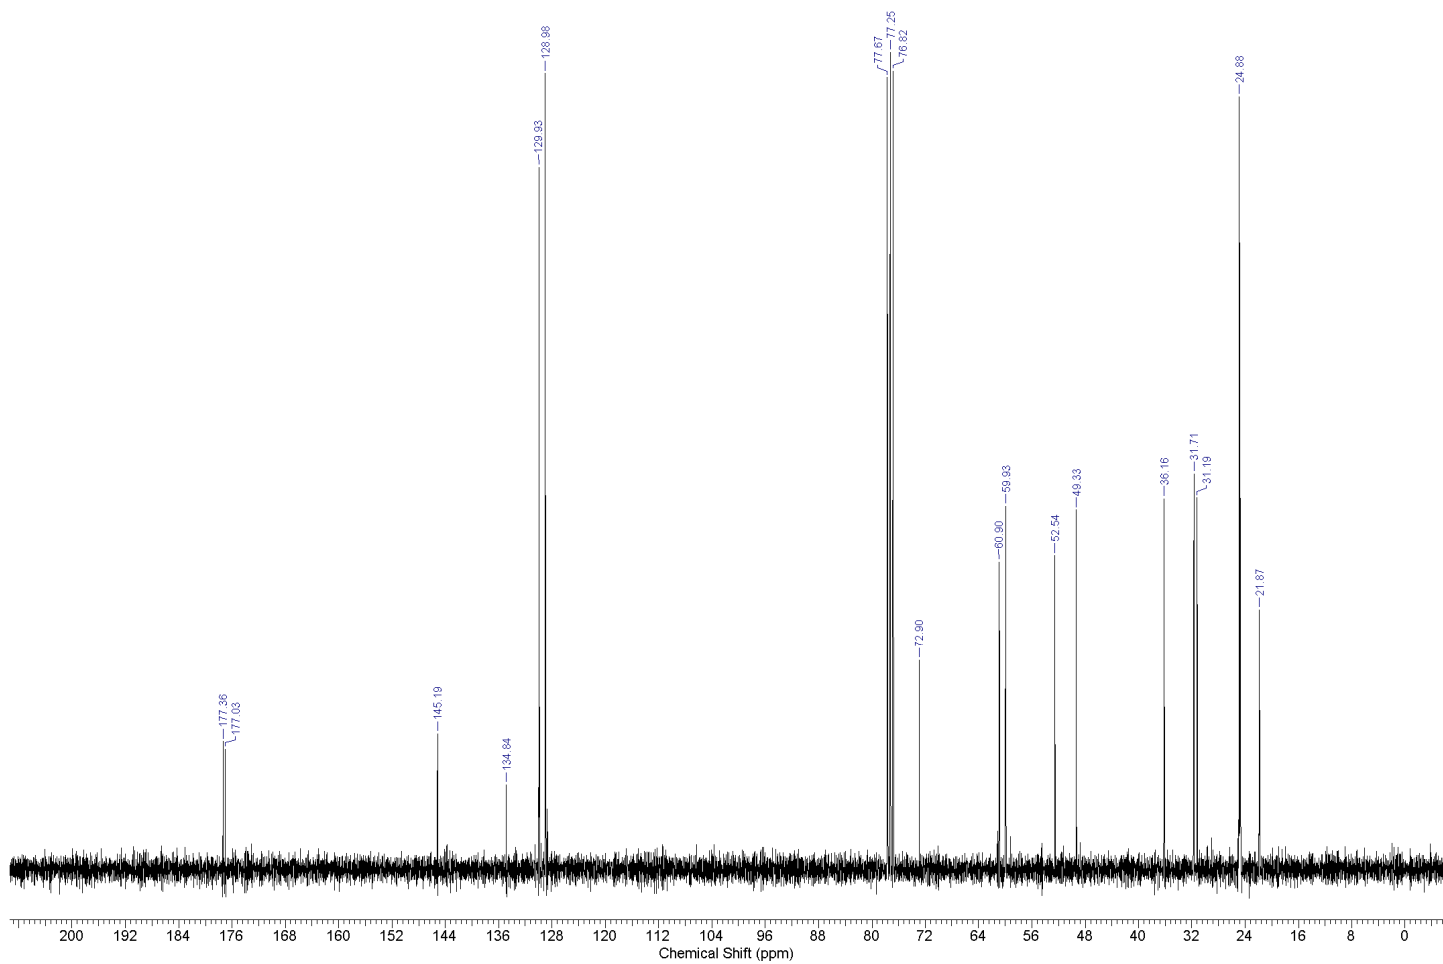

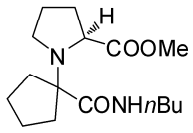

1j

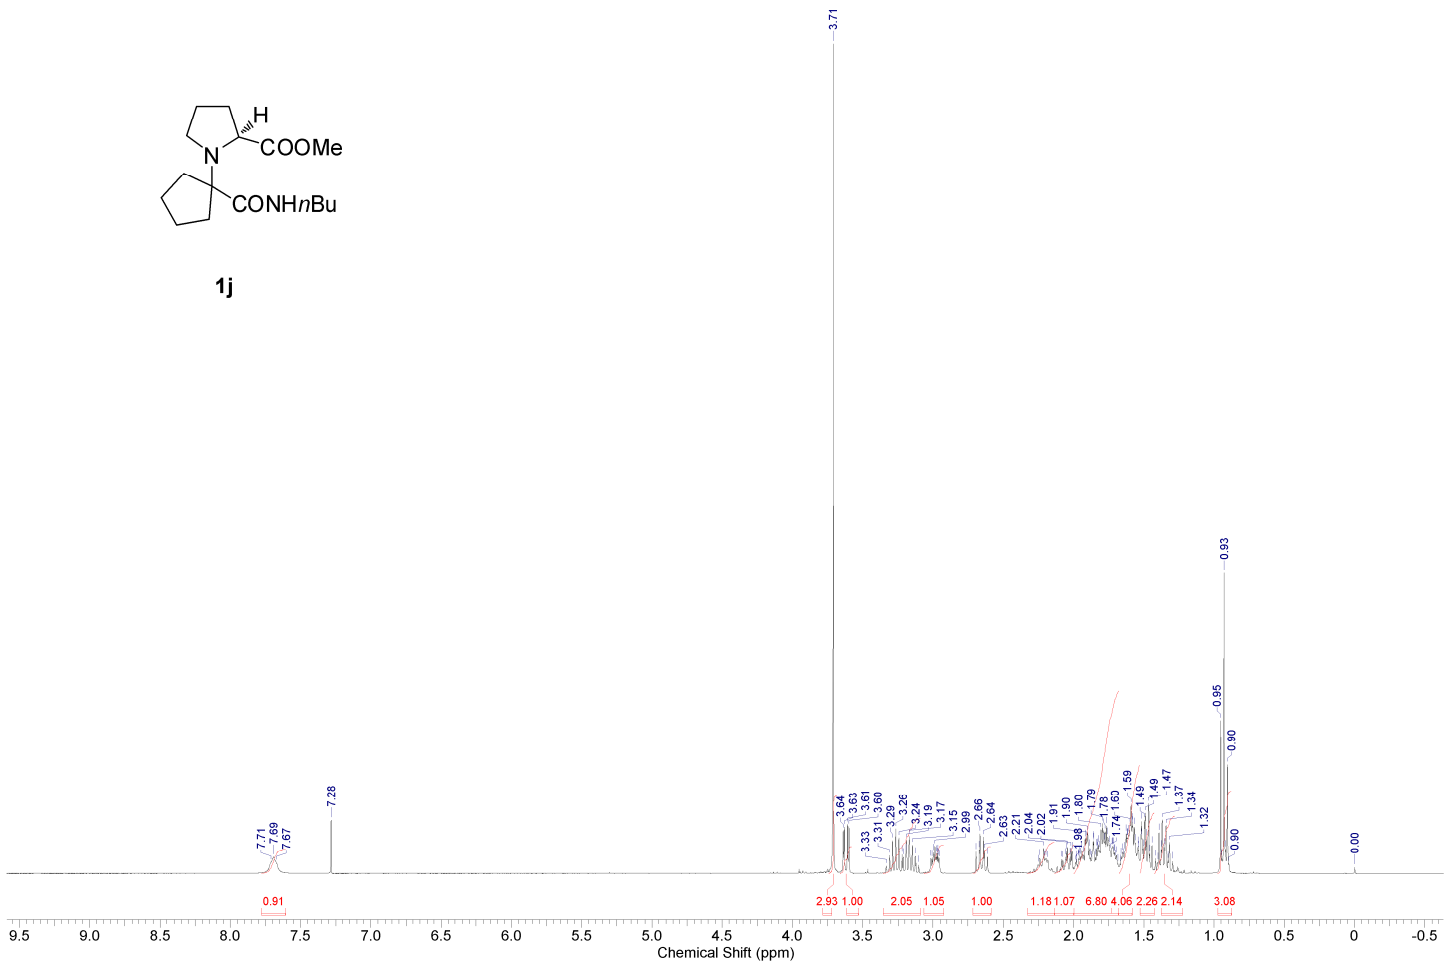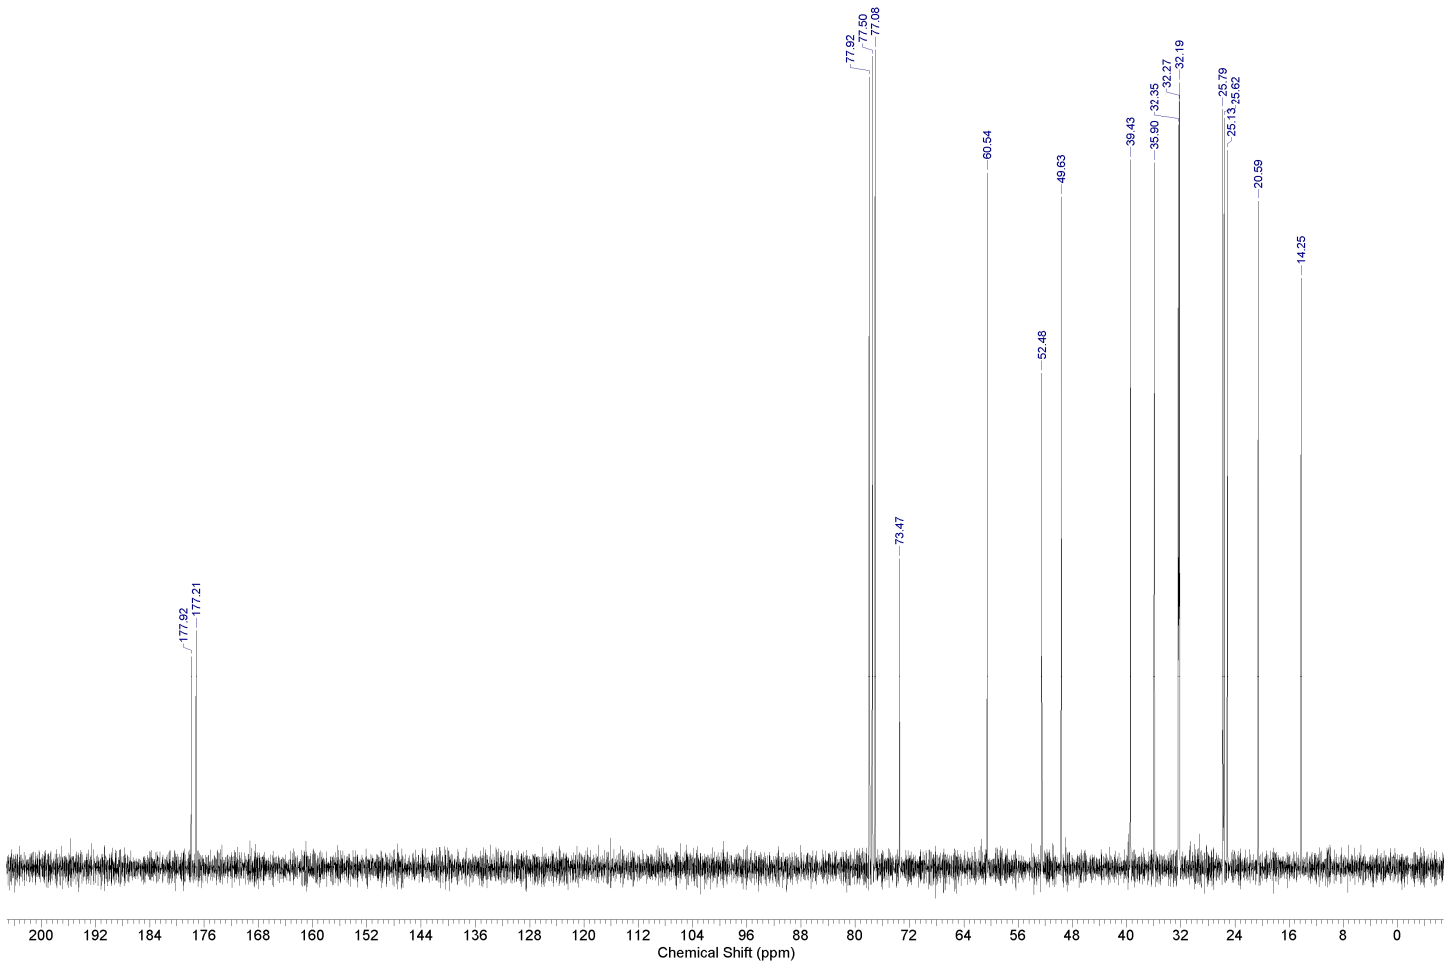

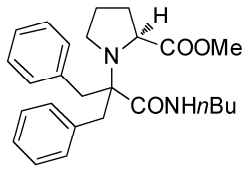

**1k**

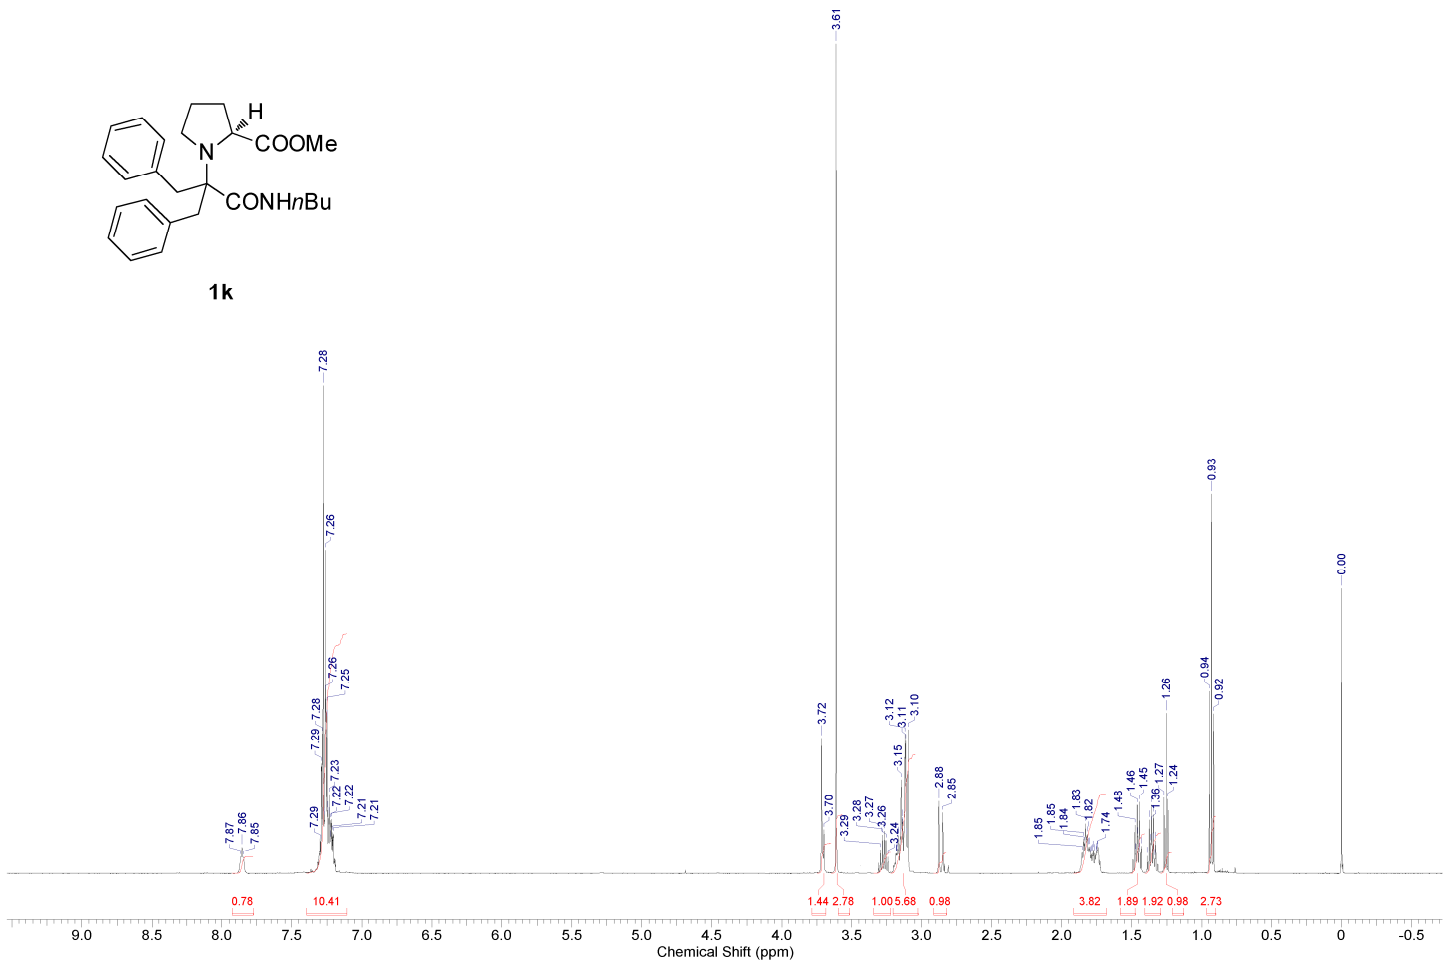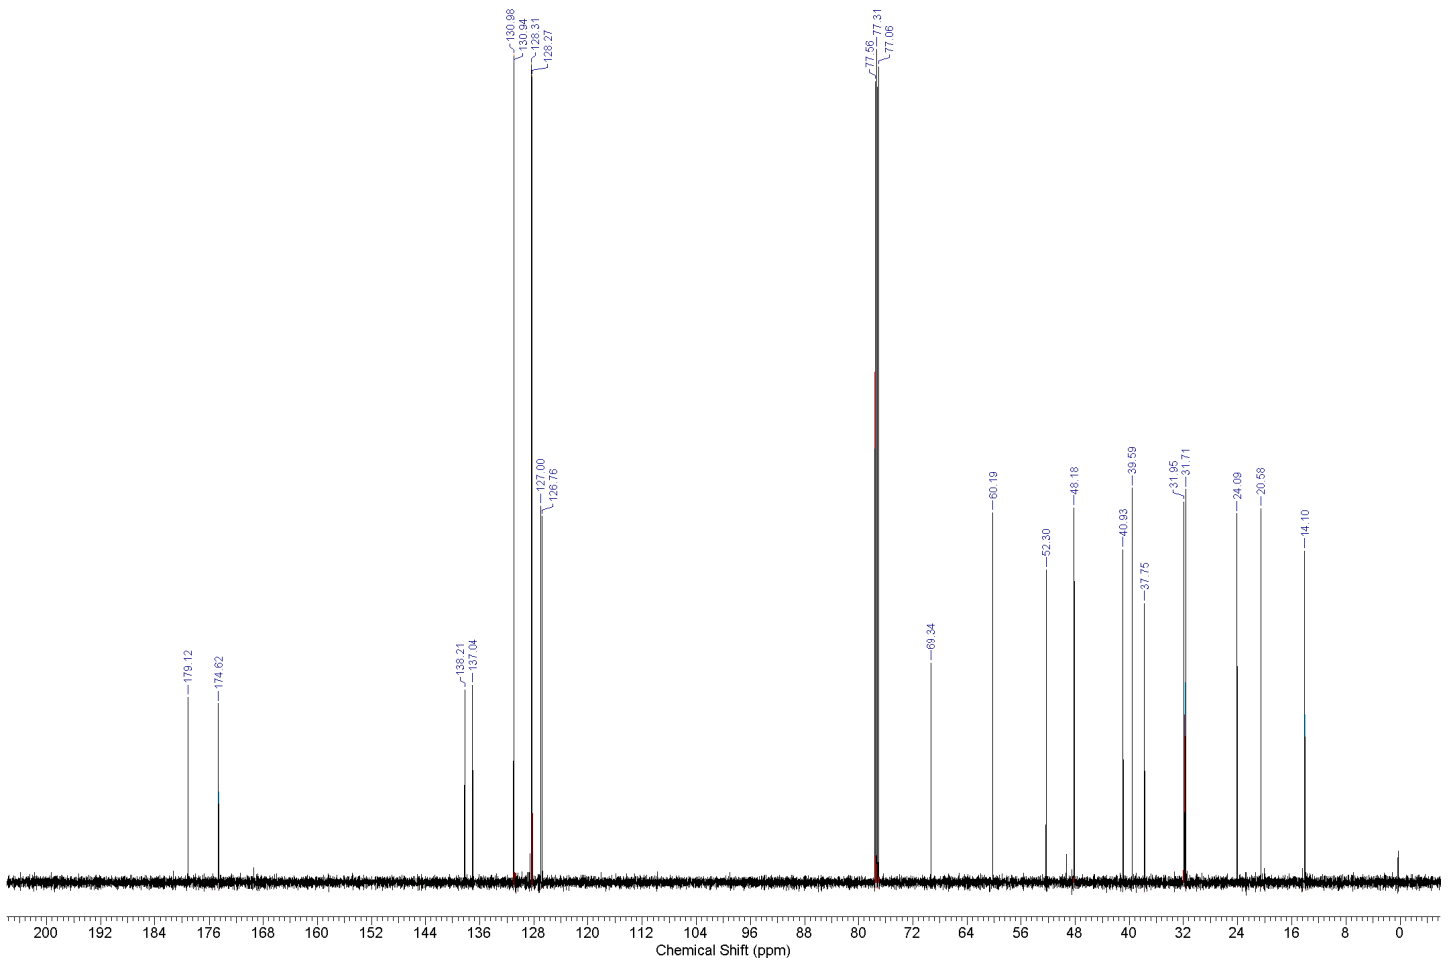

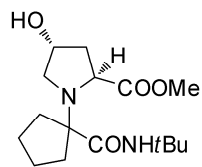

**1m**

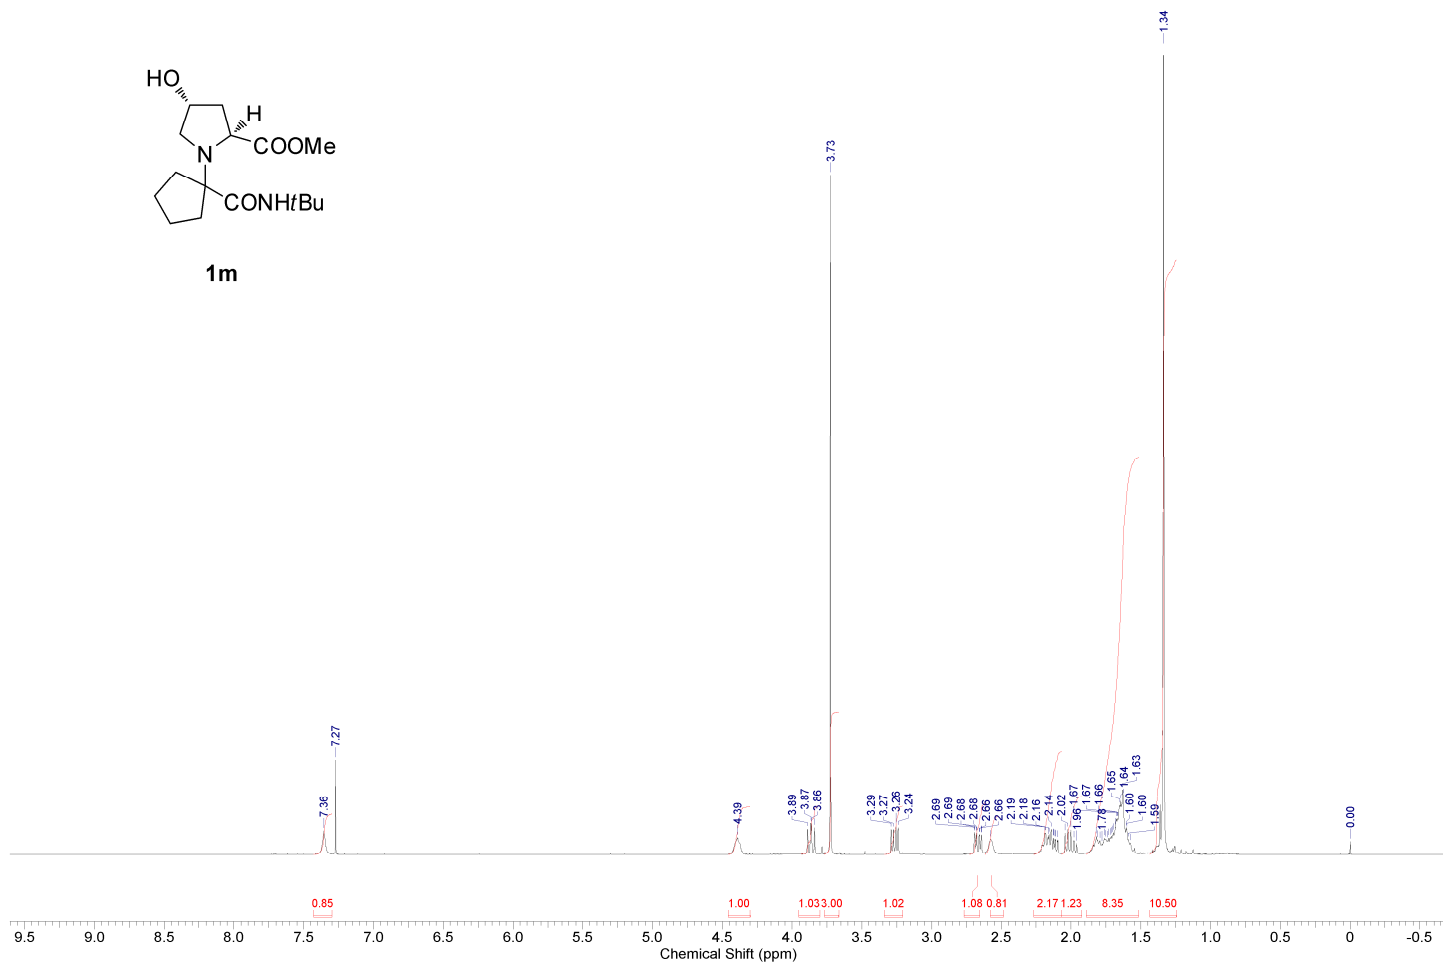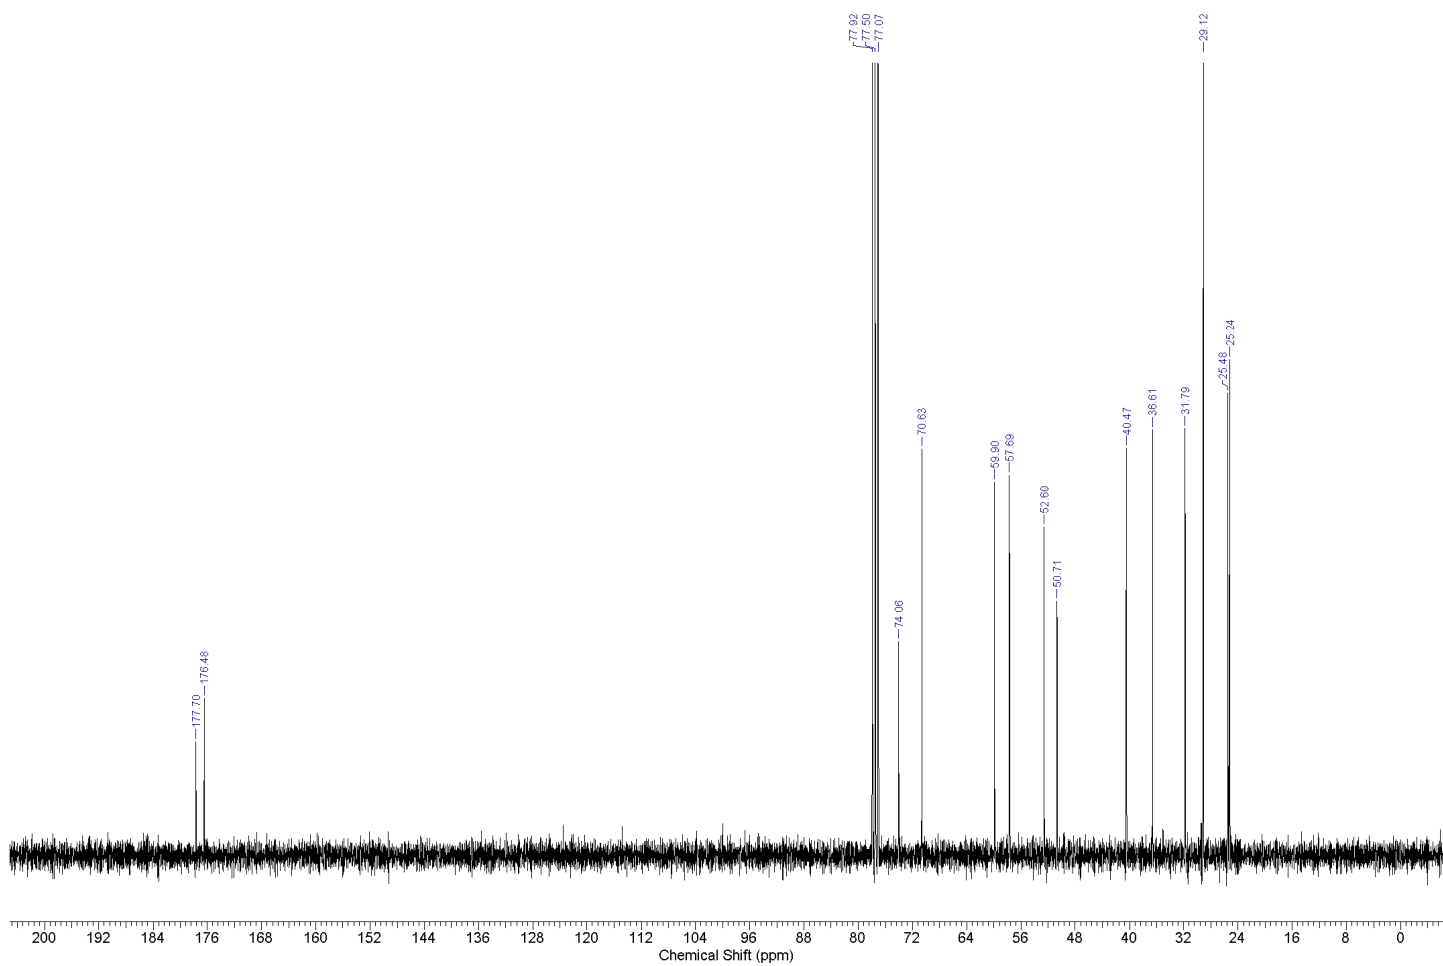

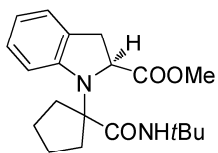

**1n**

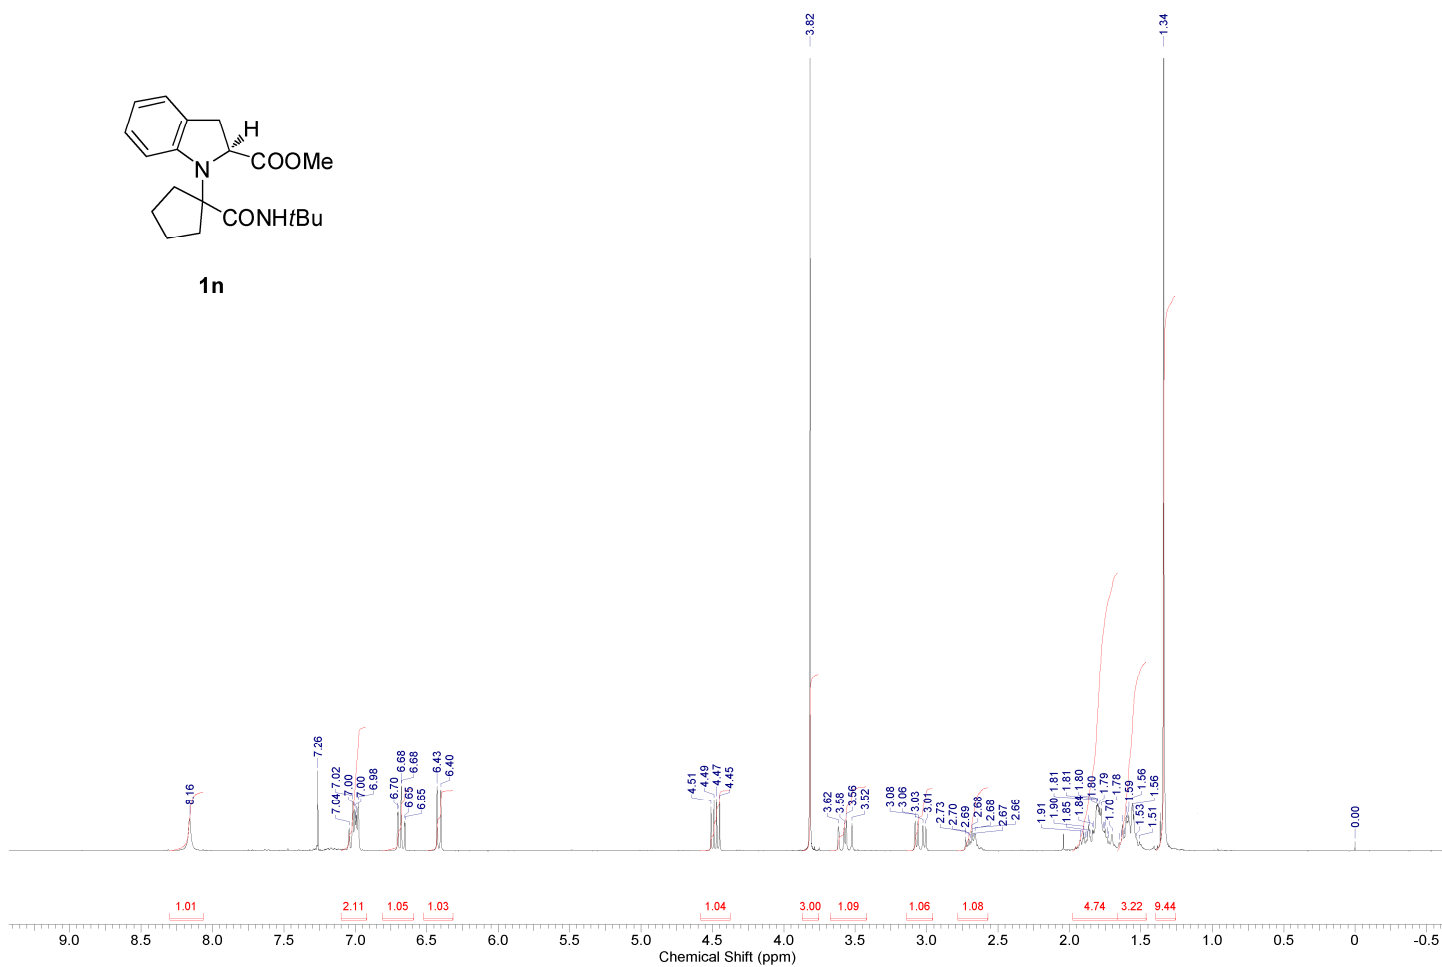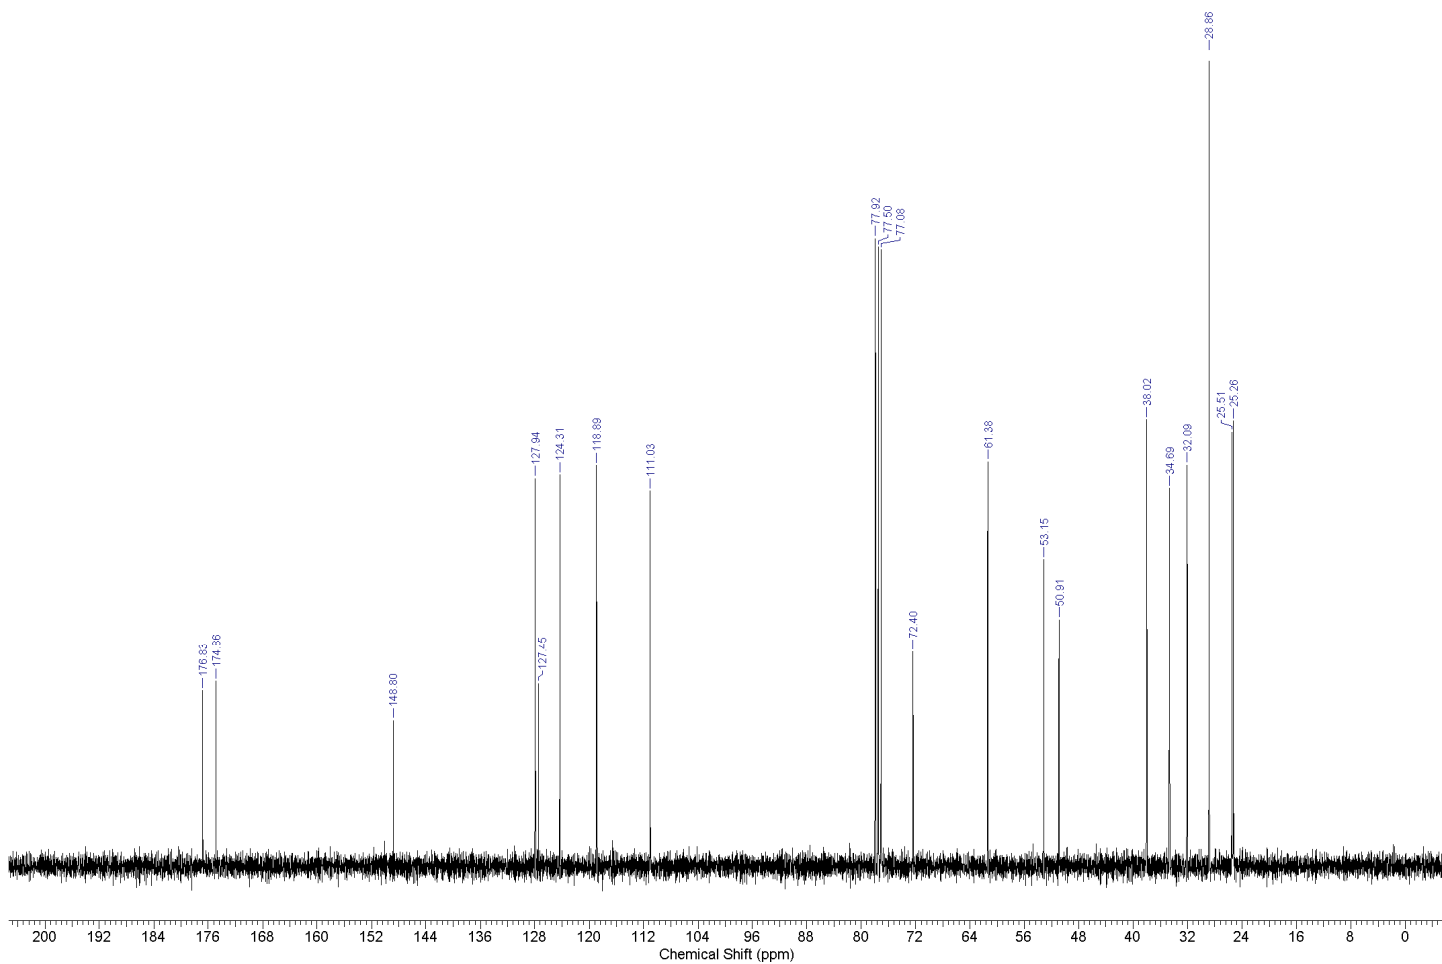

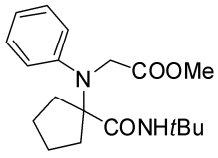

**1o**

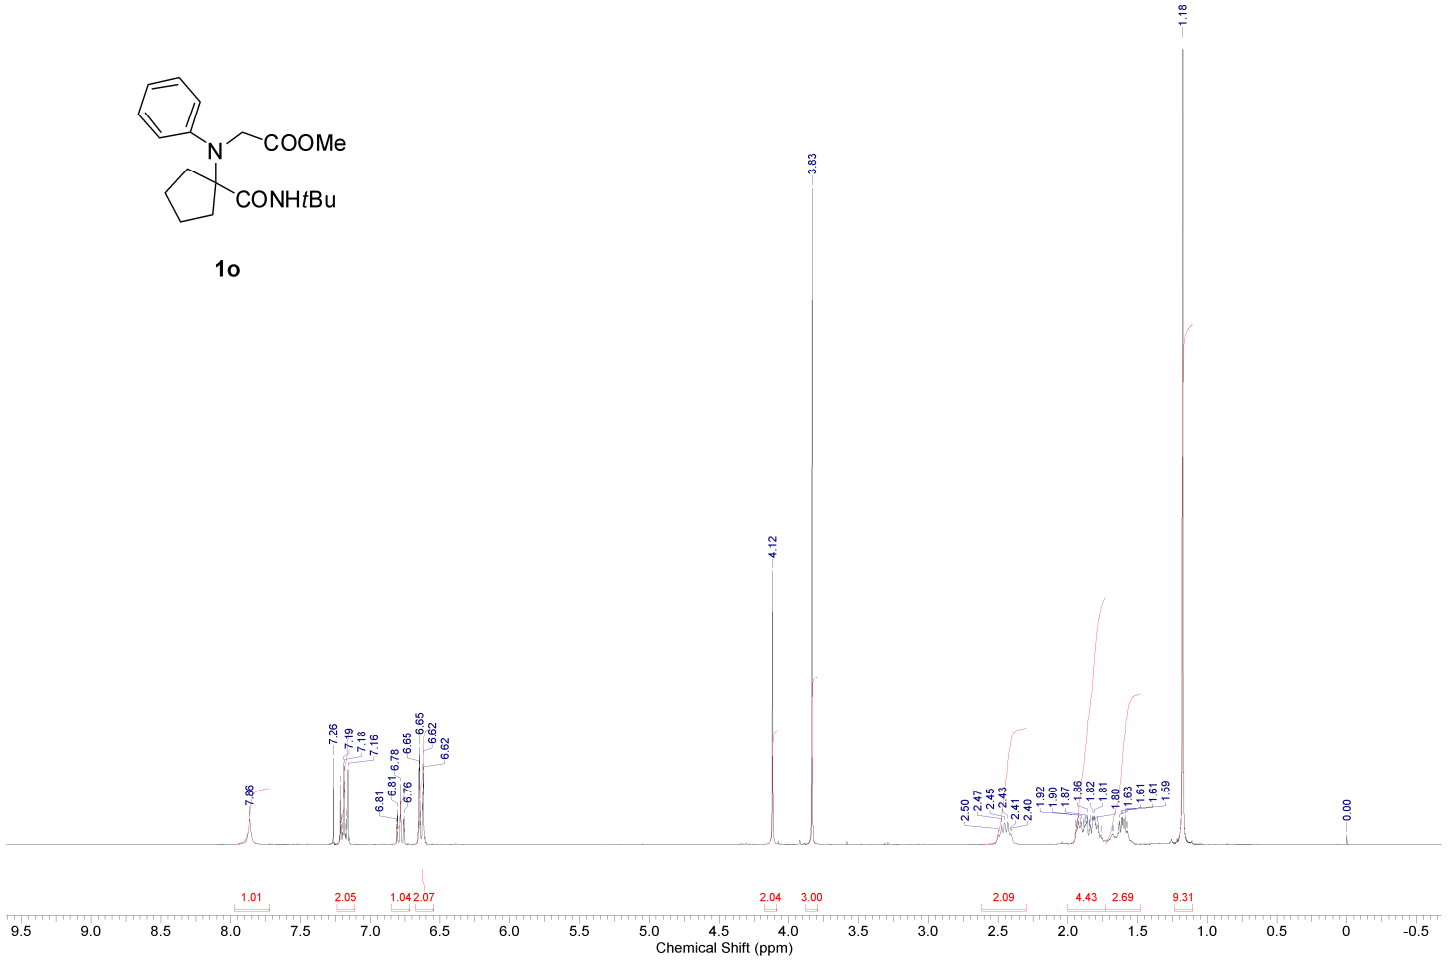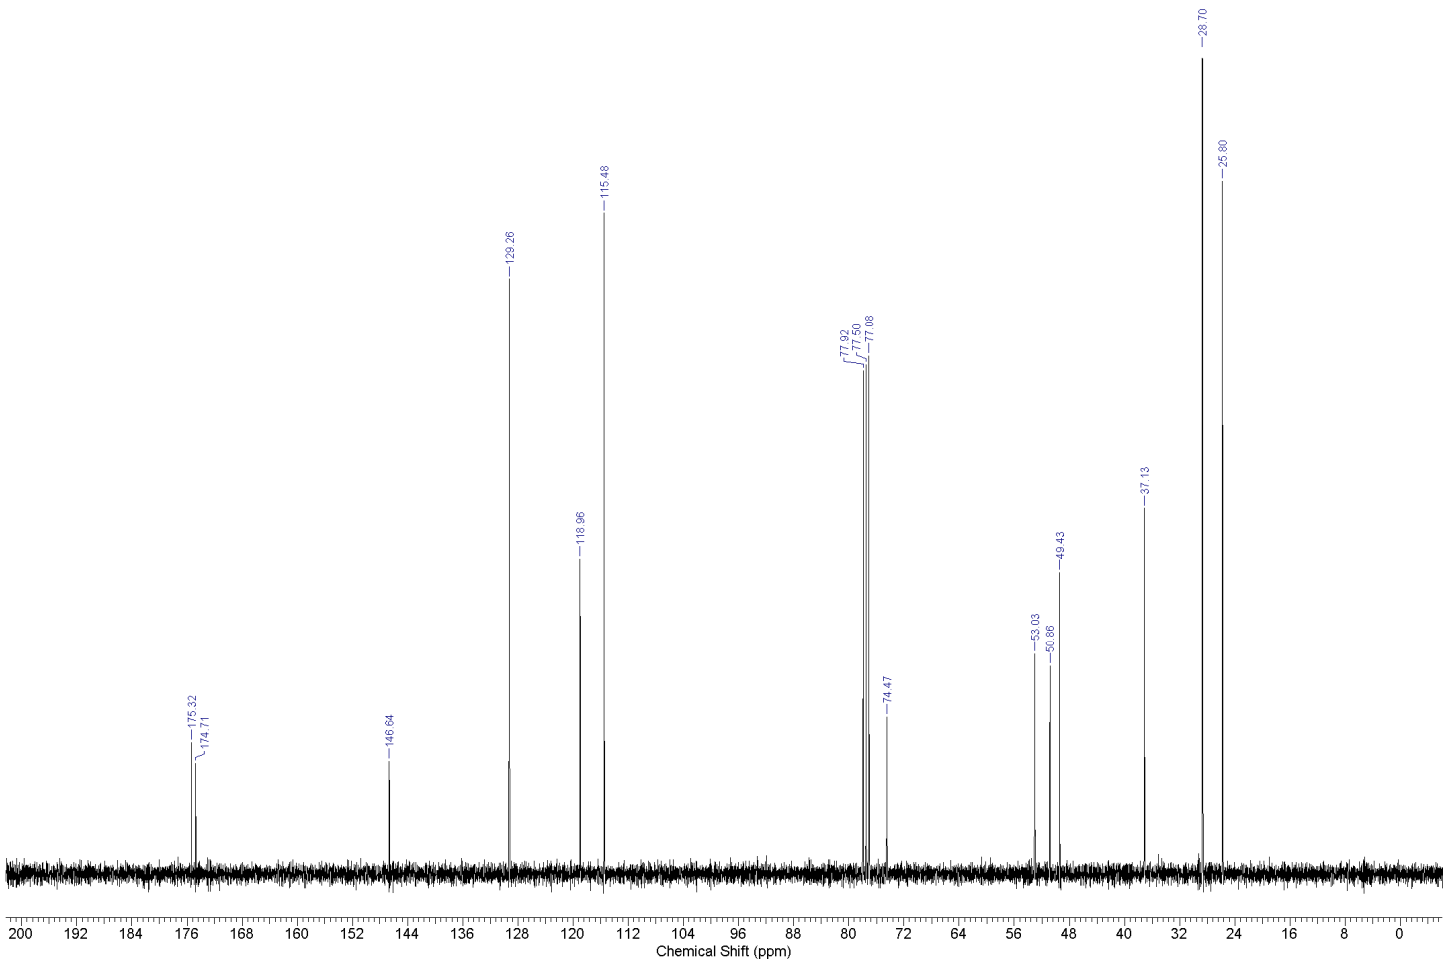

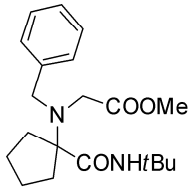

**1p**

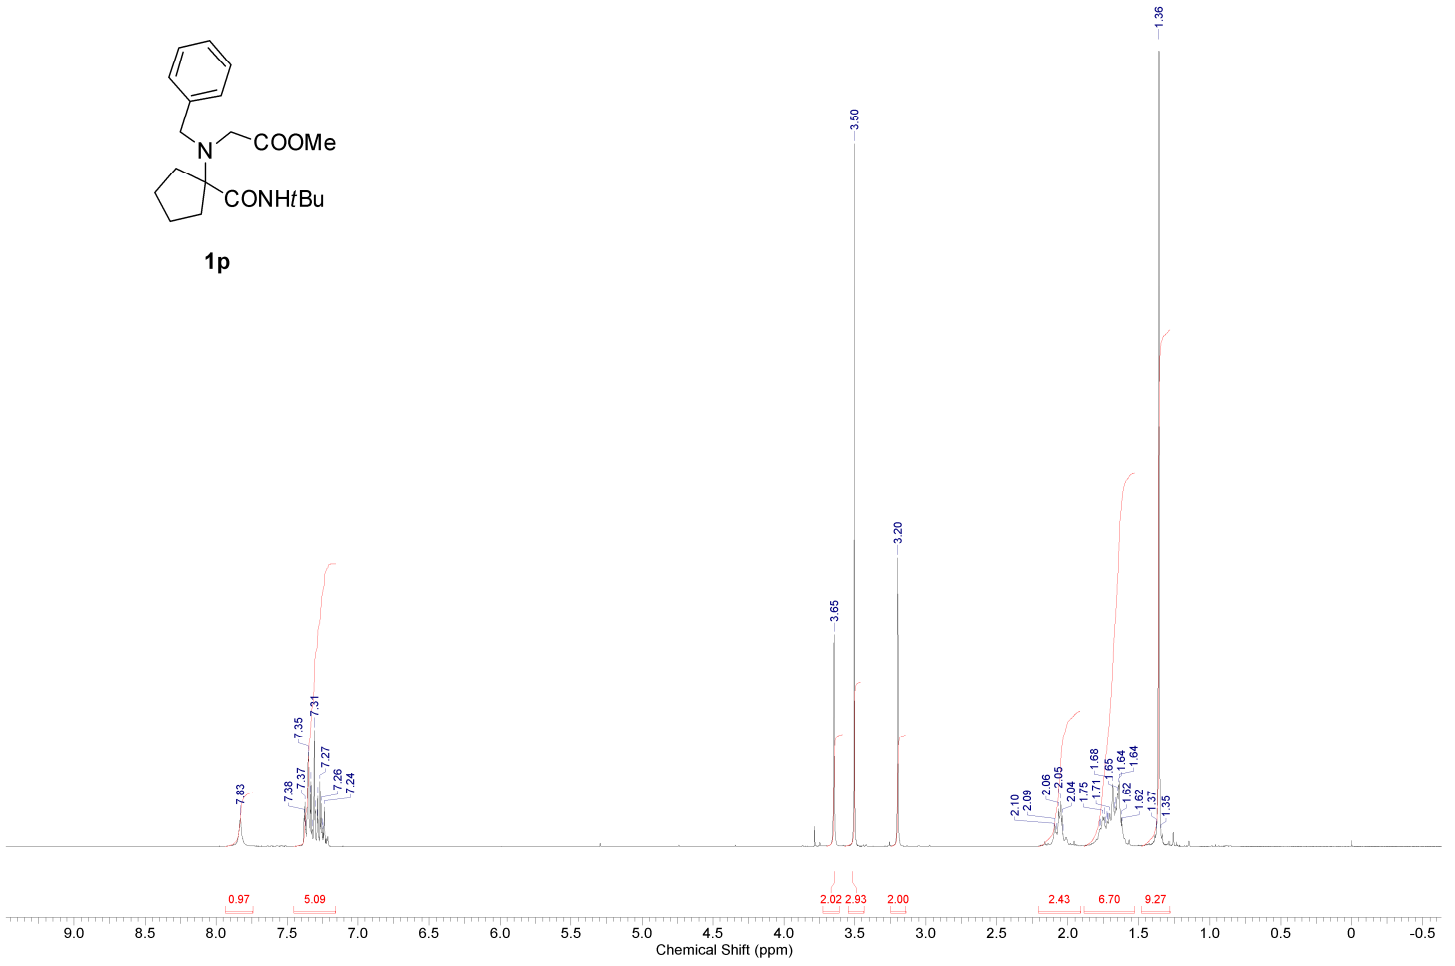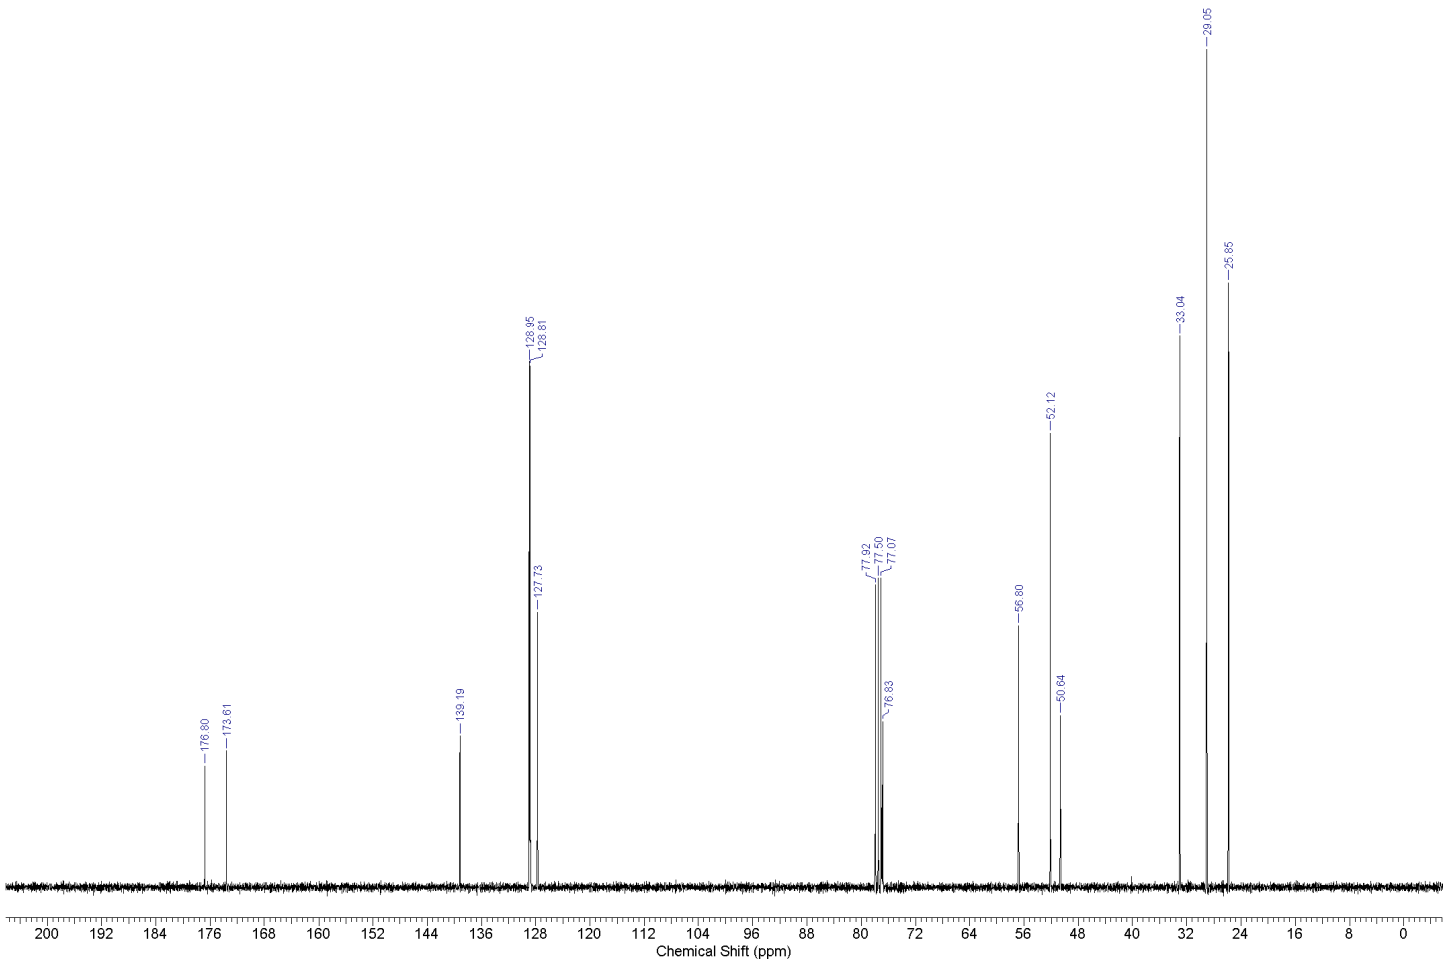

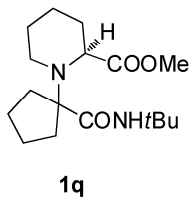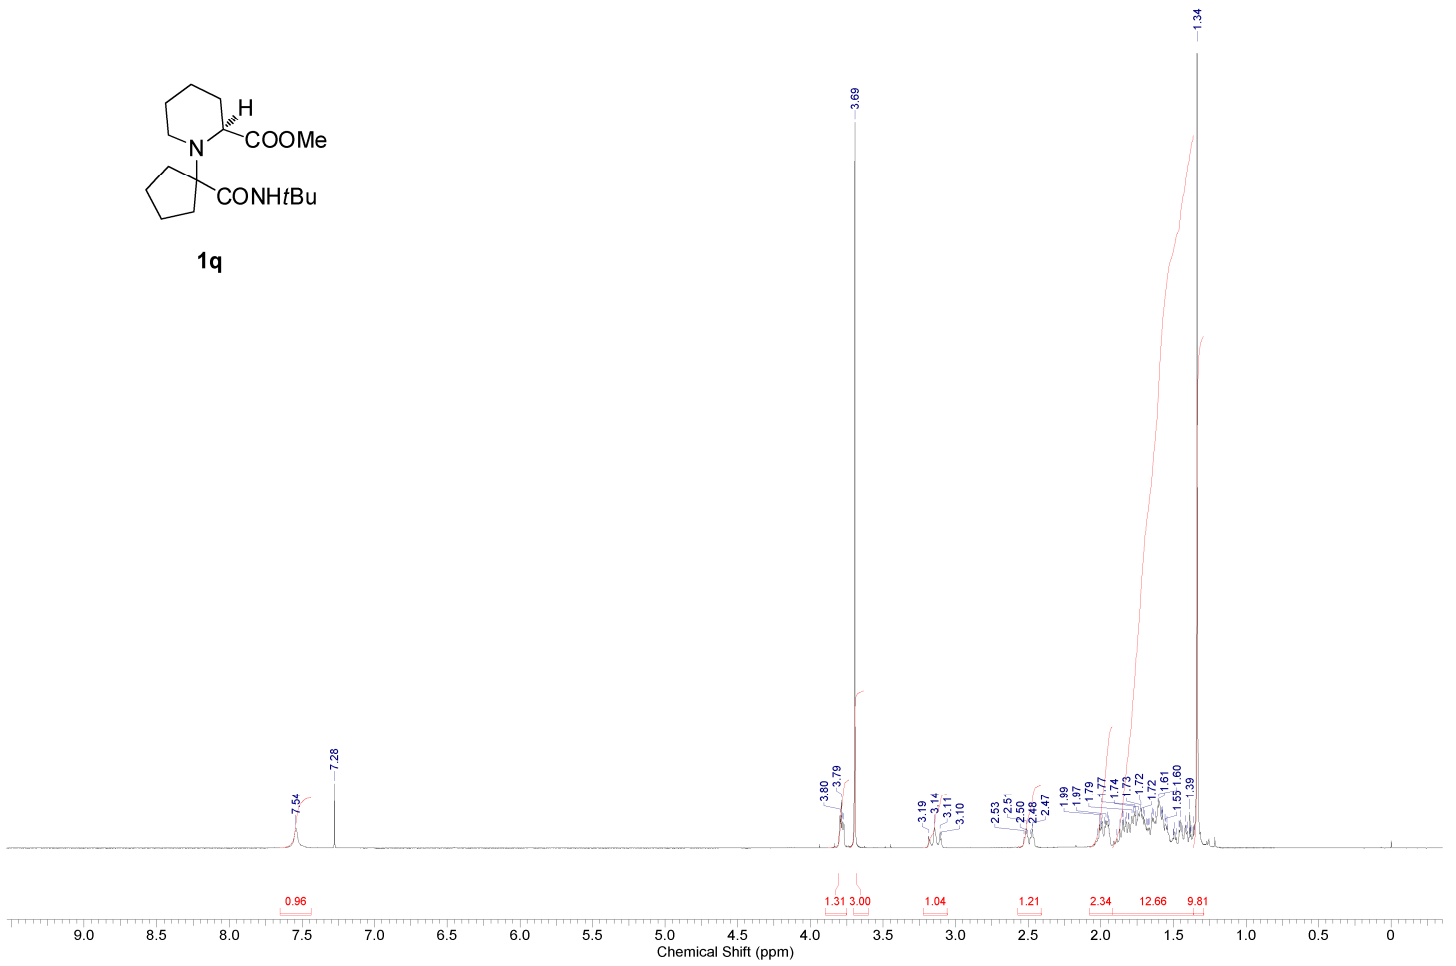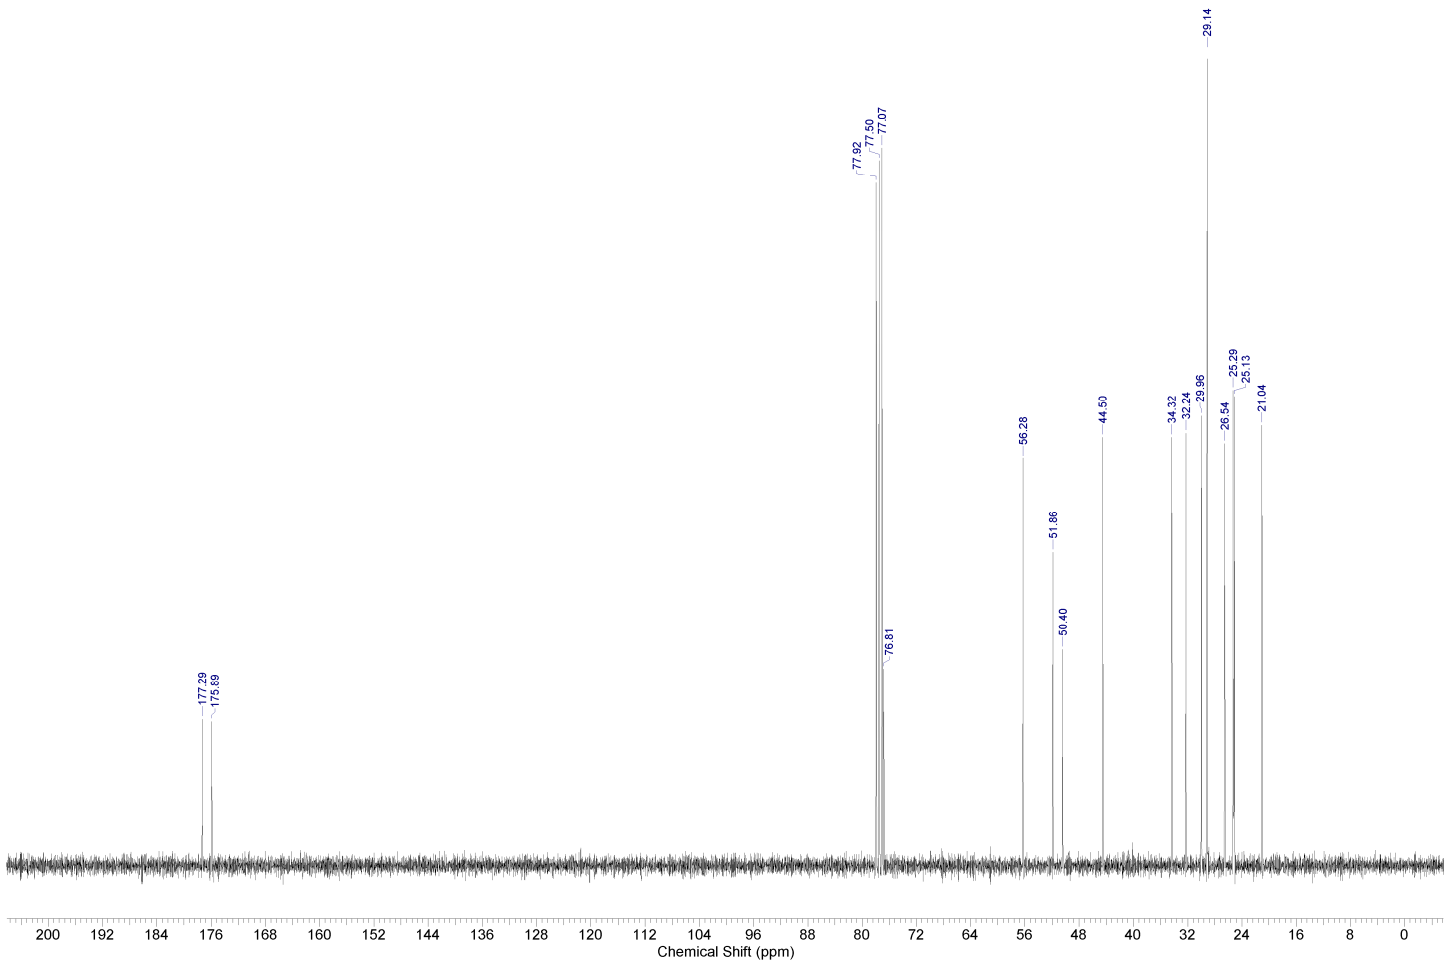



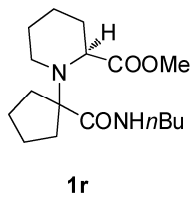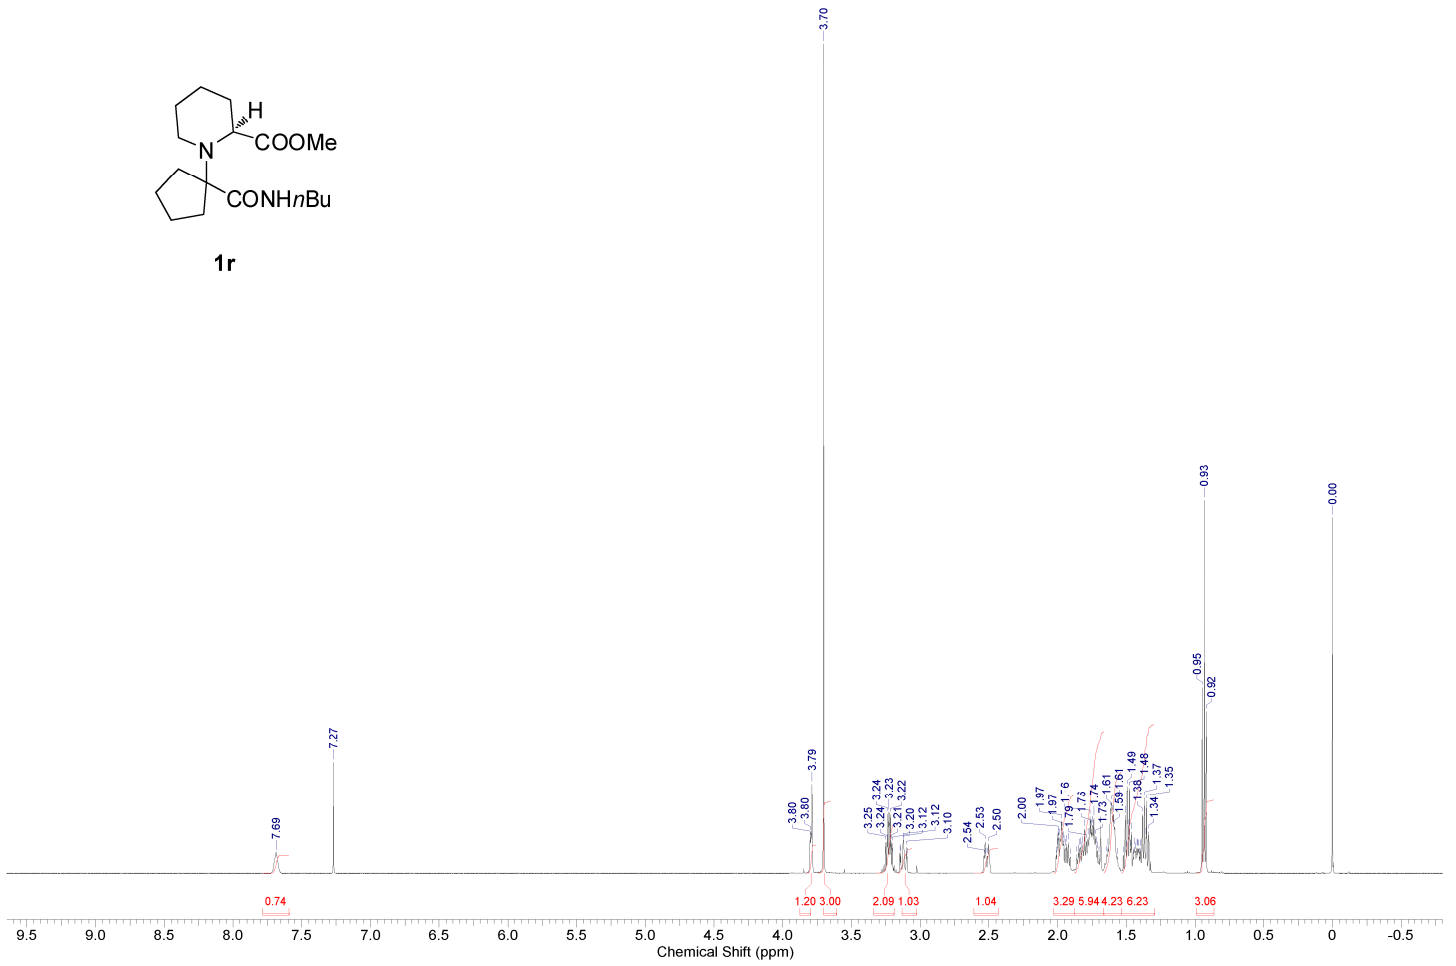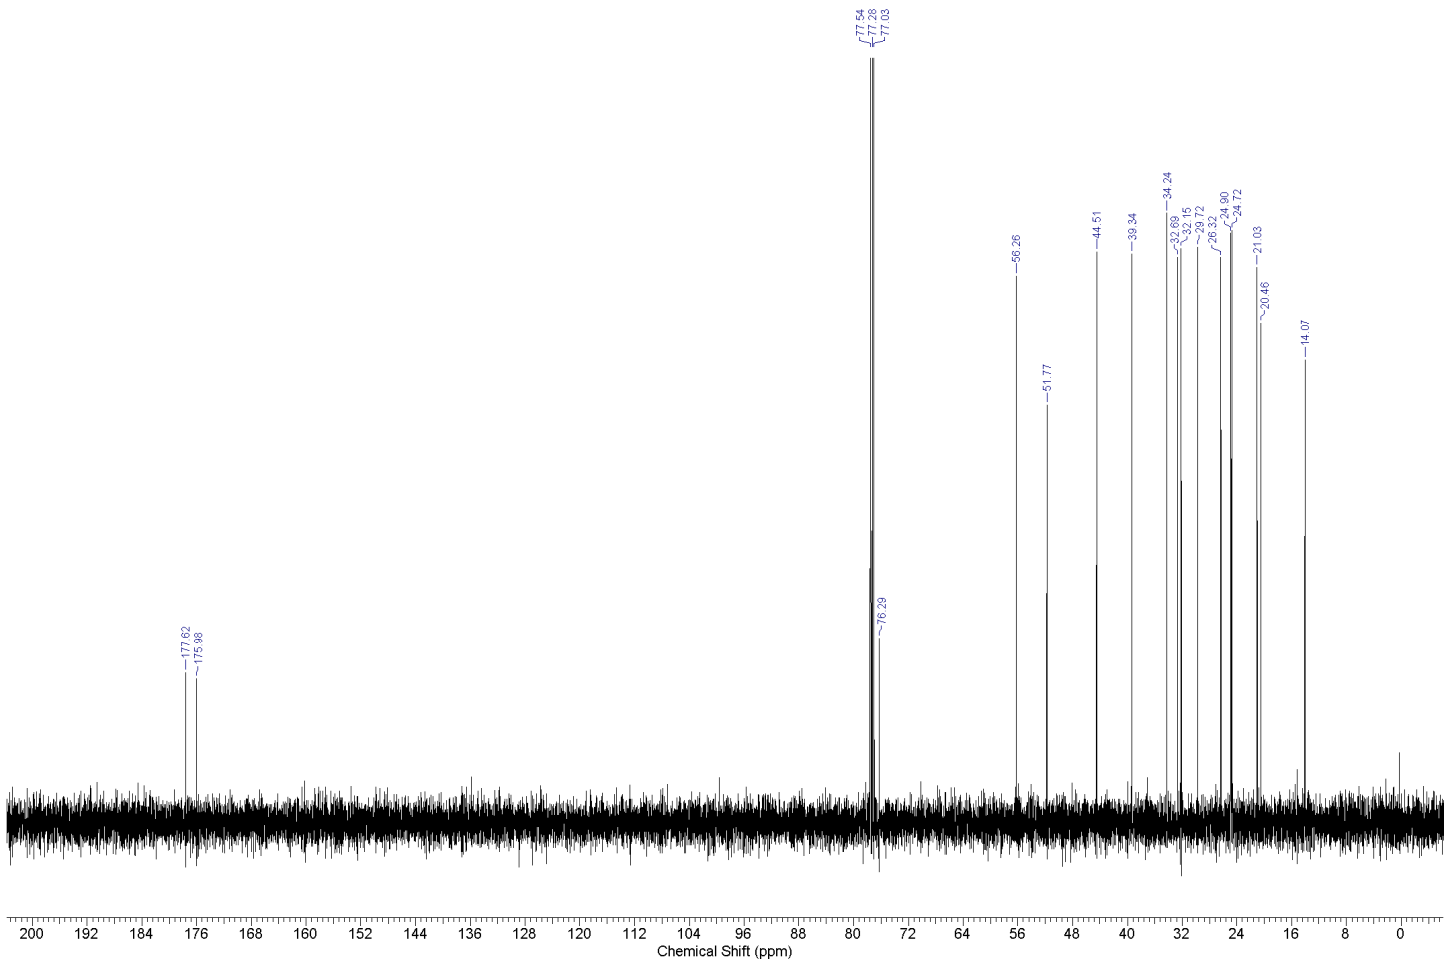

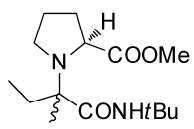

(2S,1R) and (2S,1S)-1u

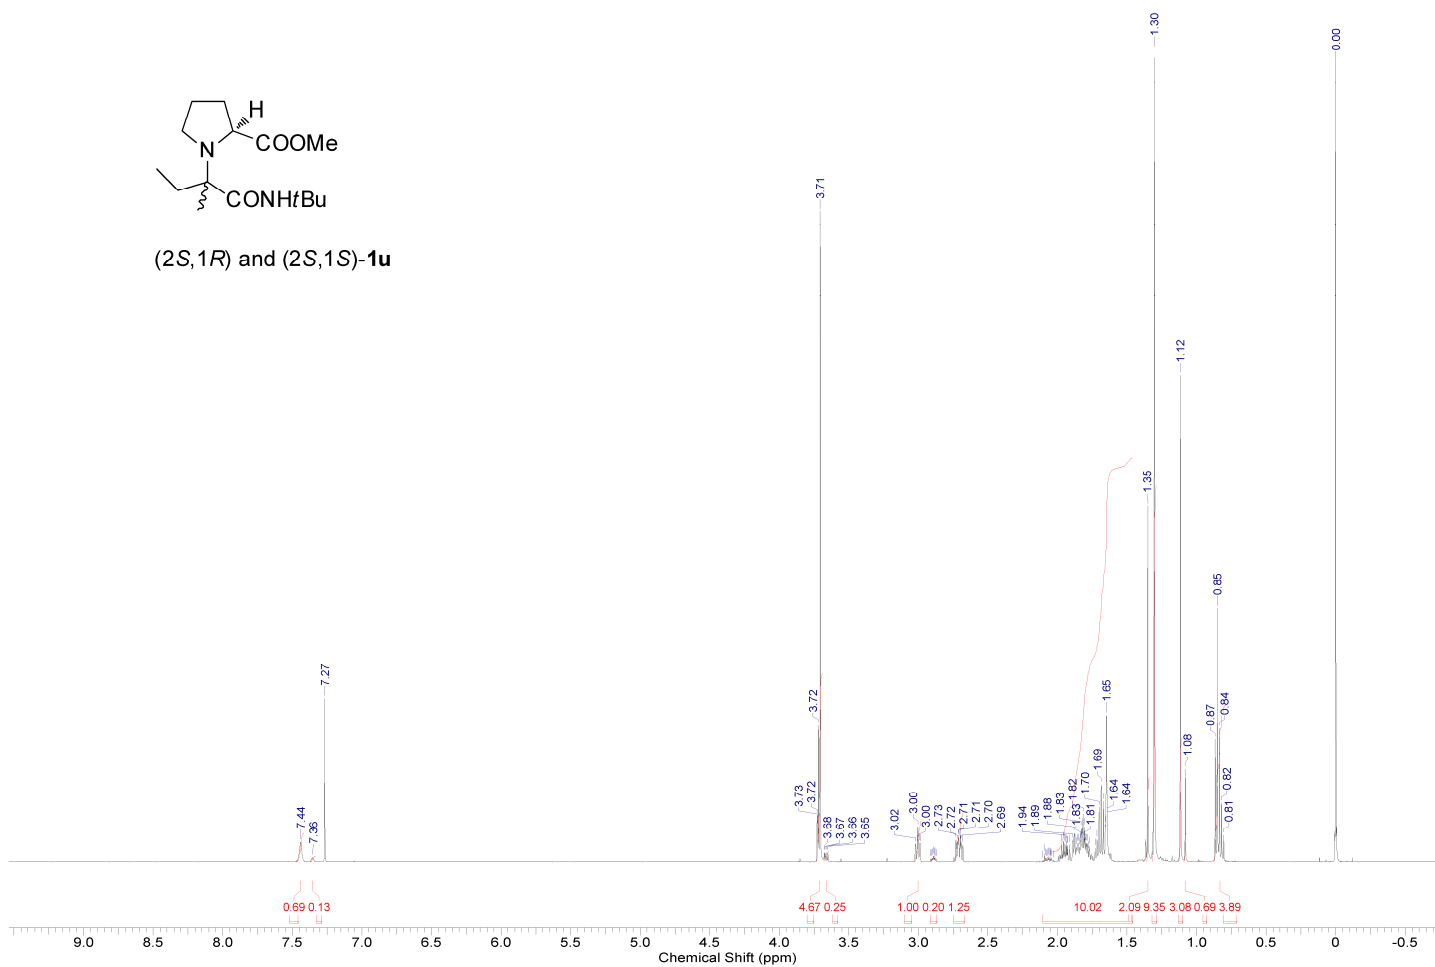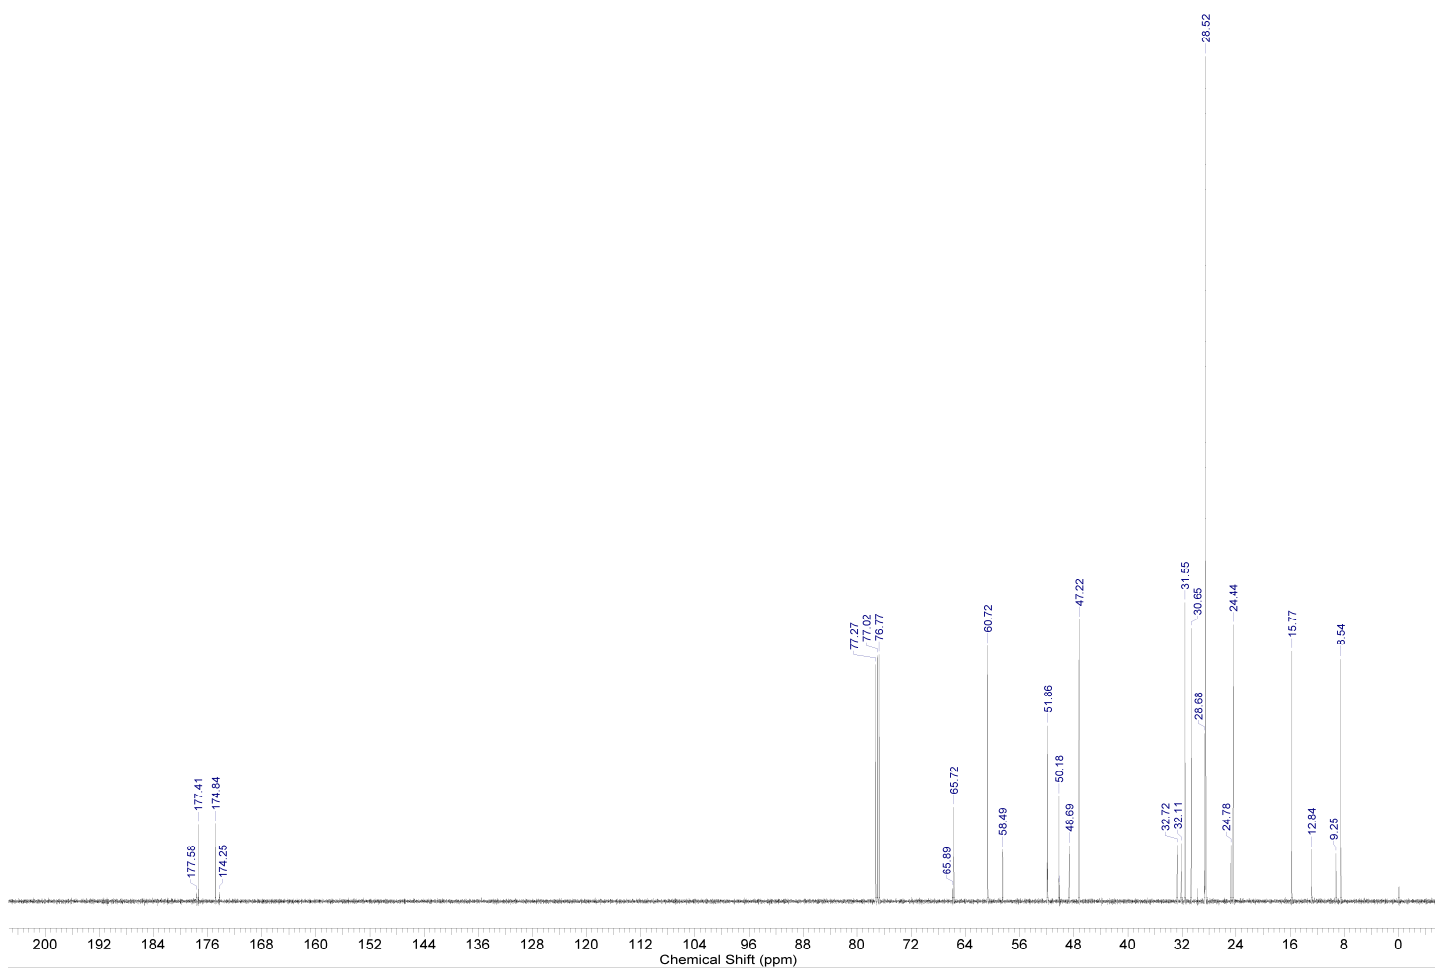

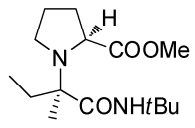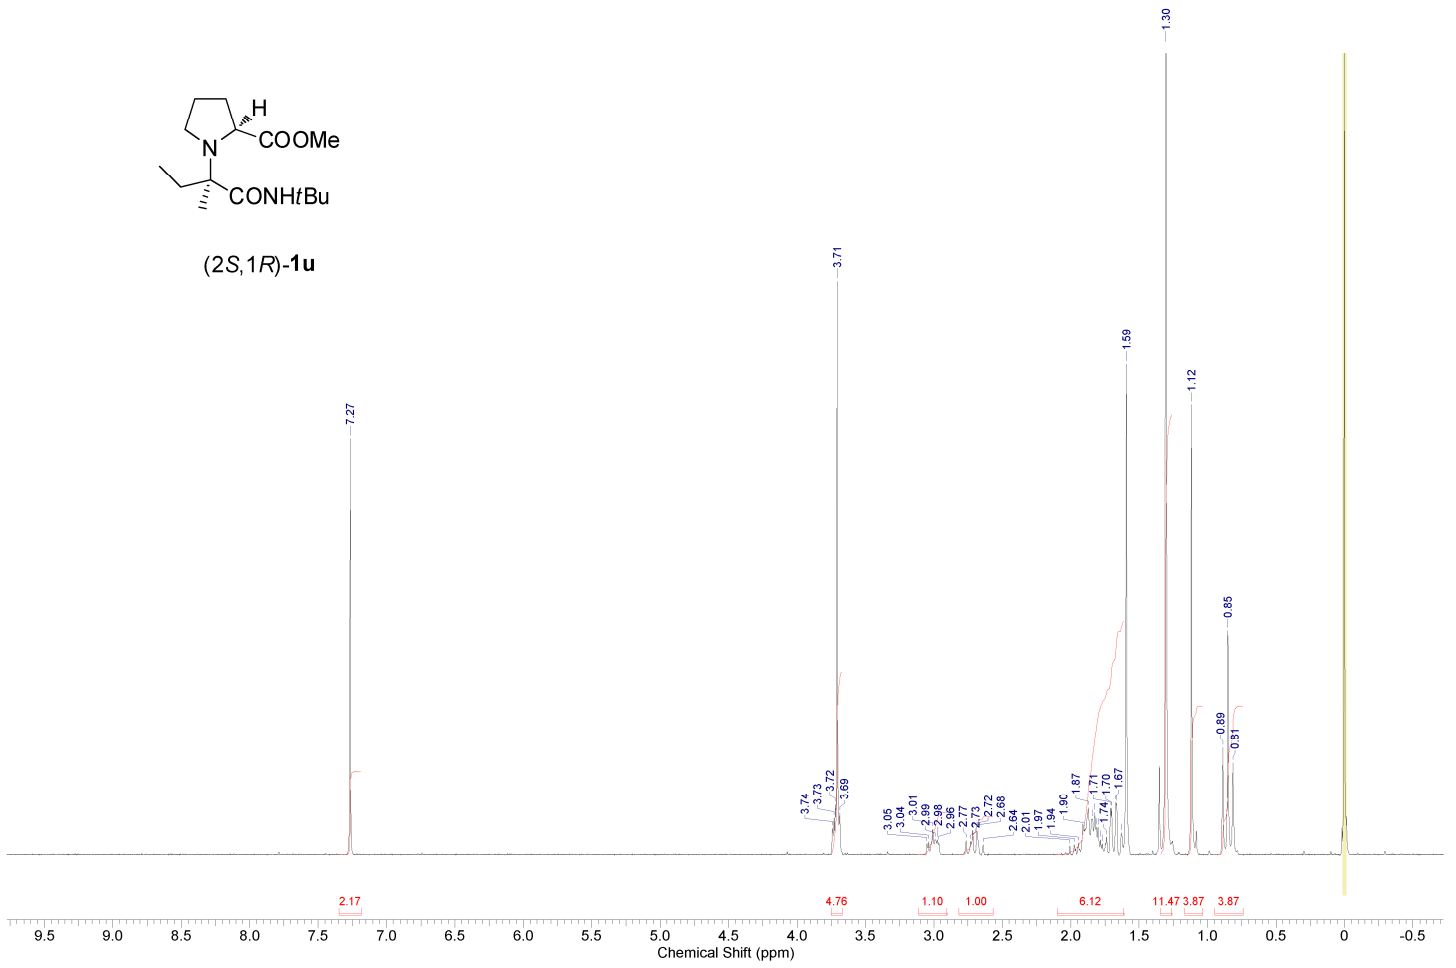

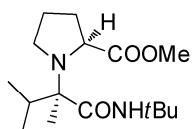

(2S,1R)-1v

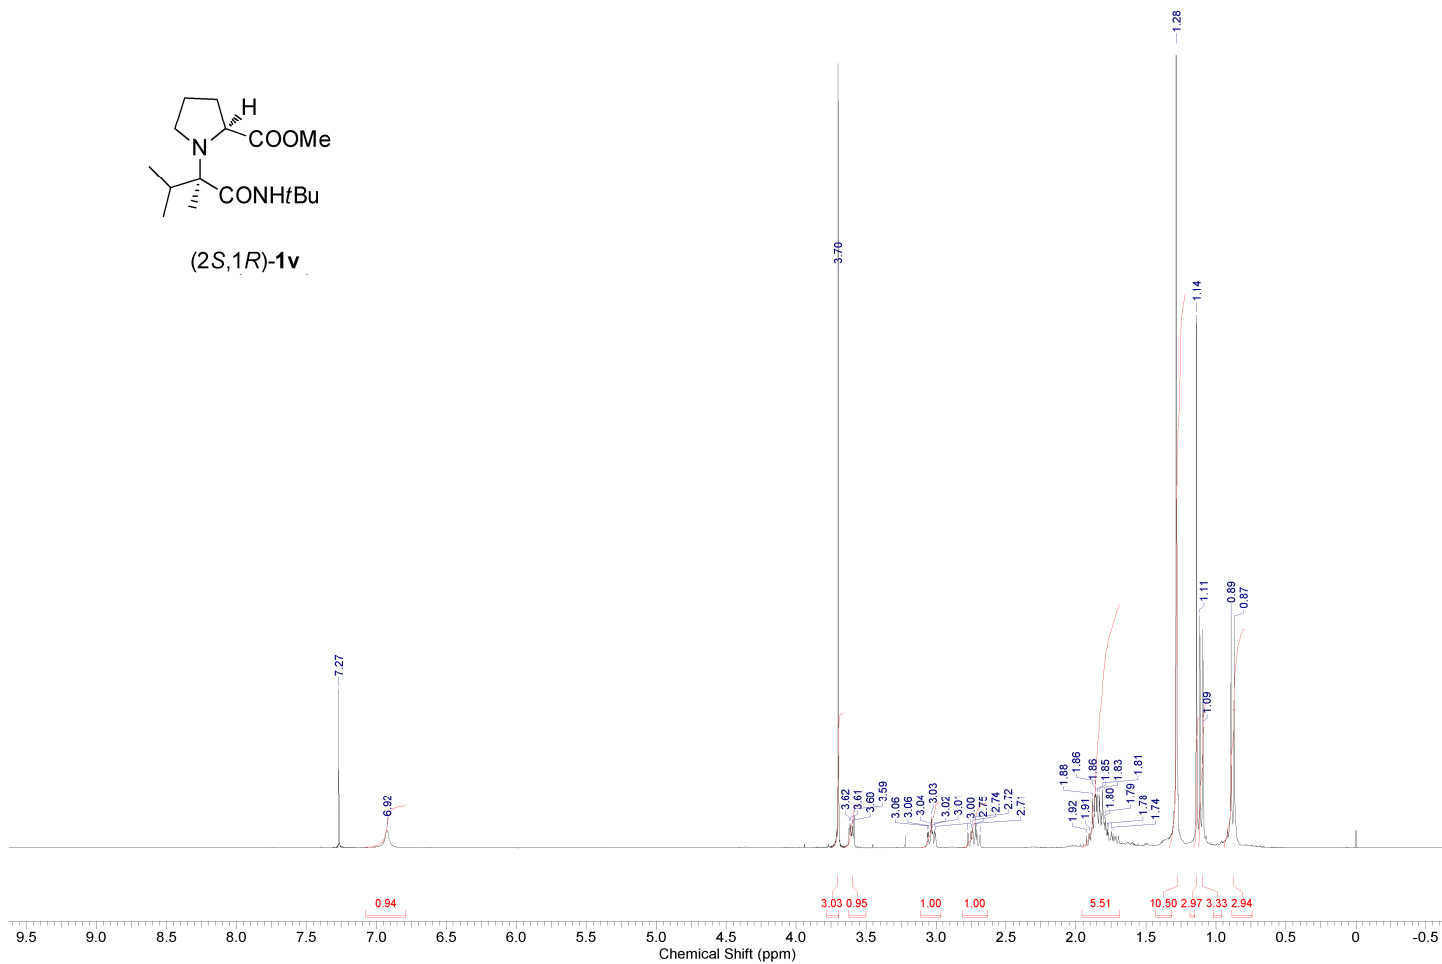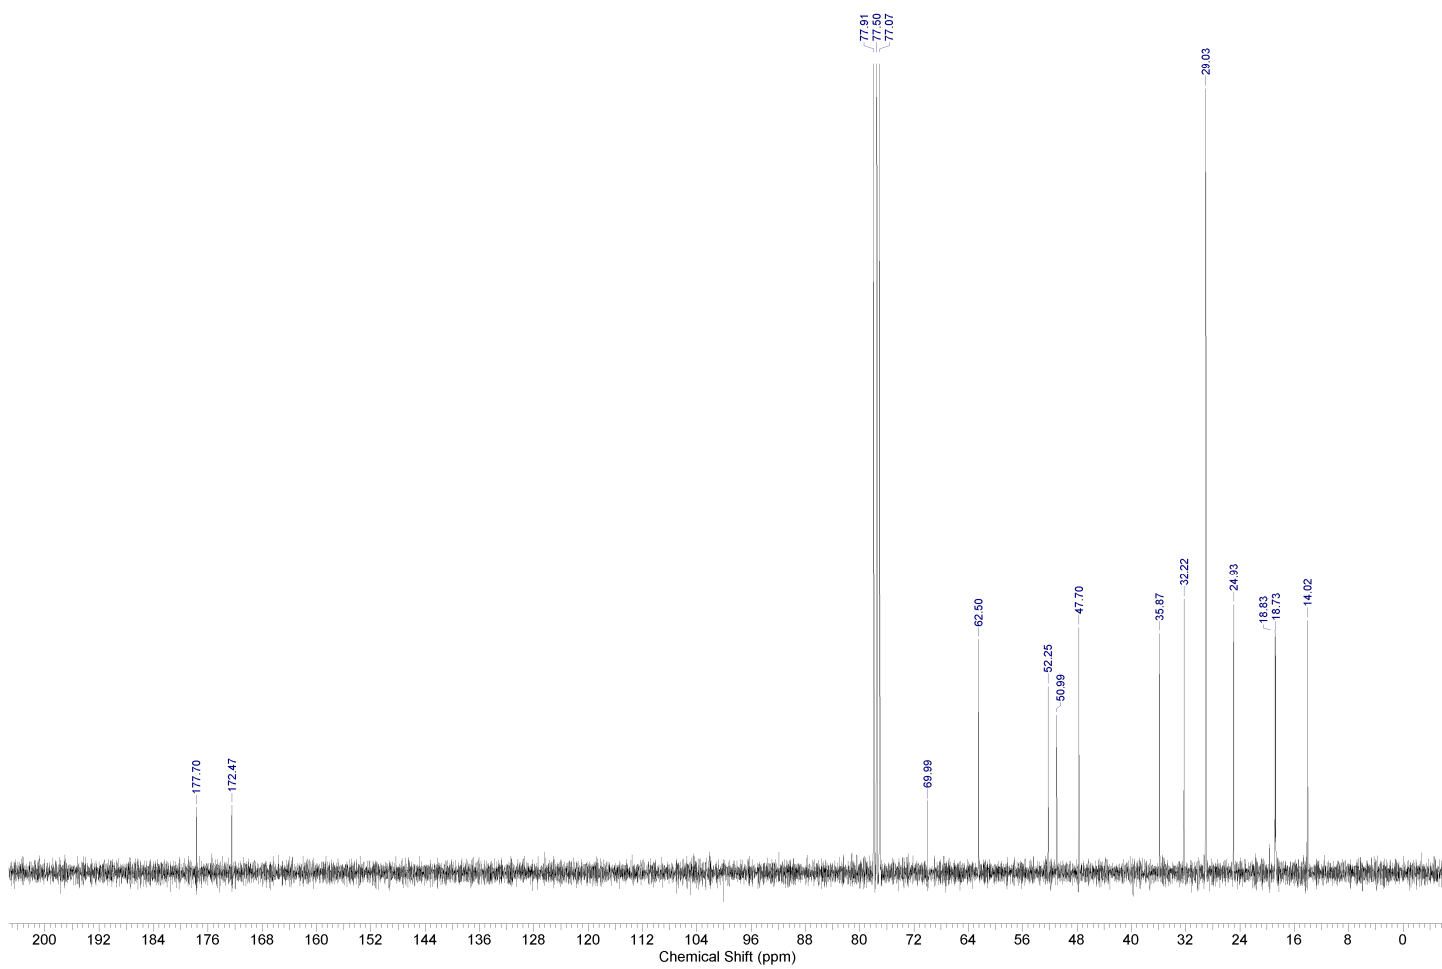

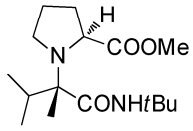

(2S,1S)-1v

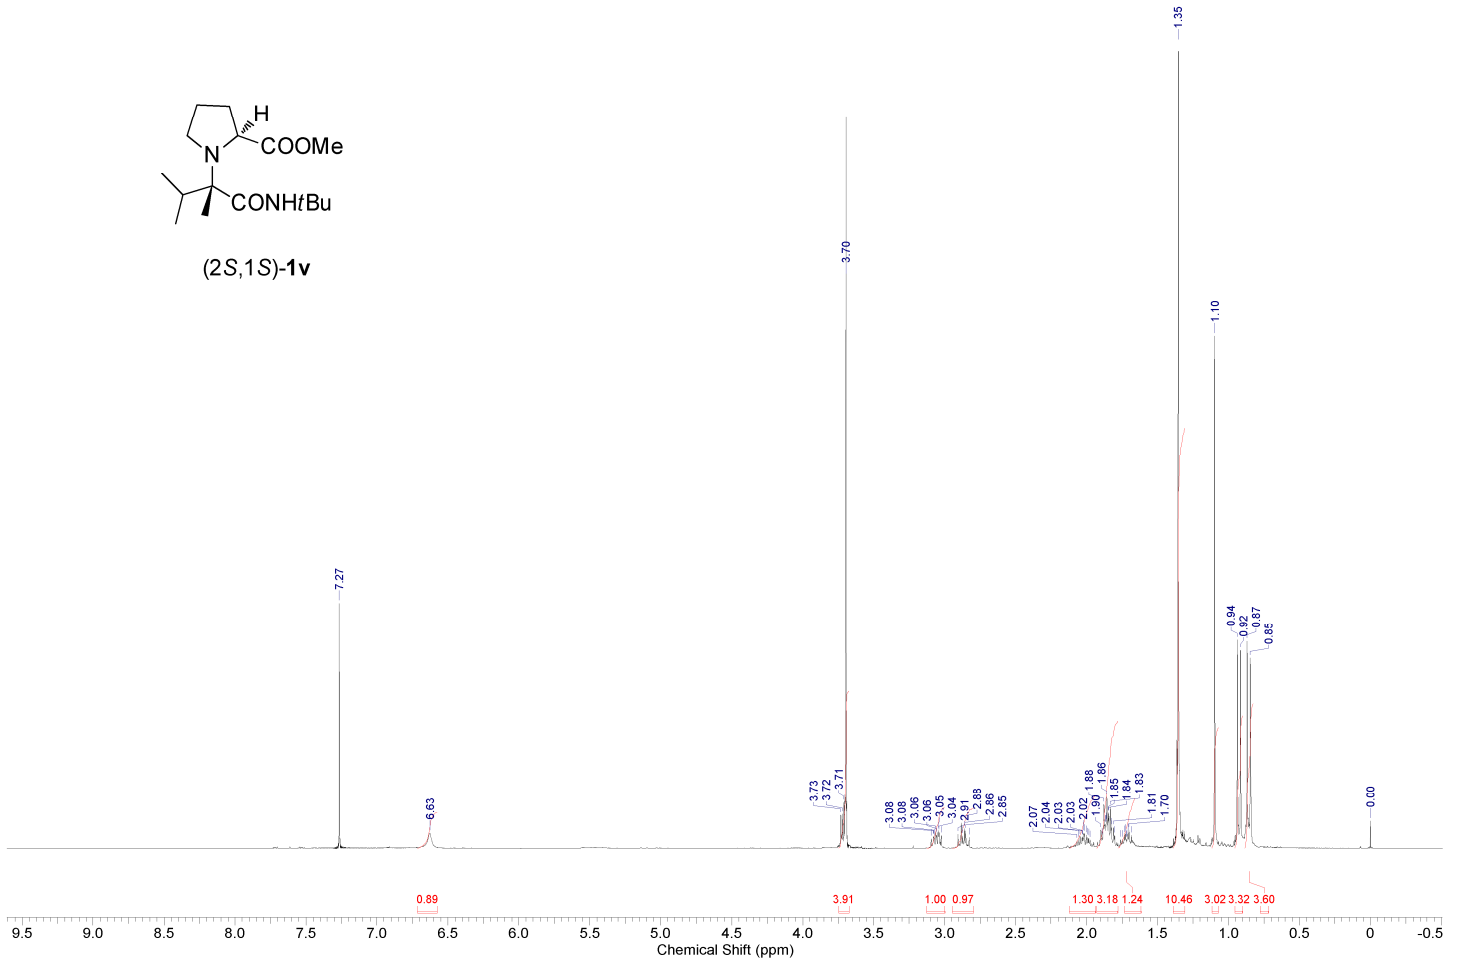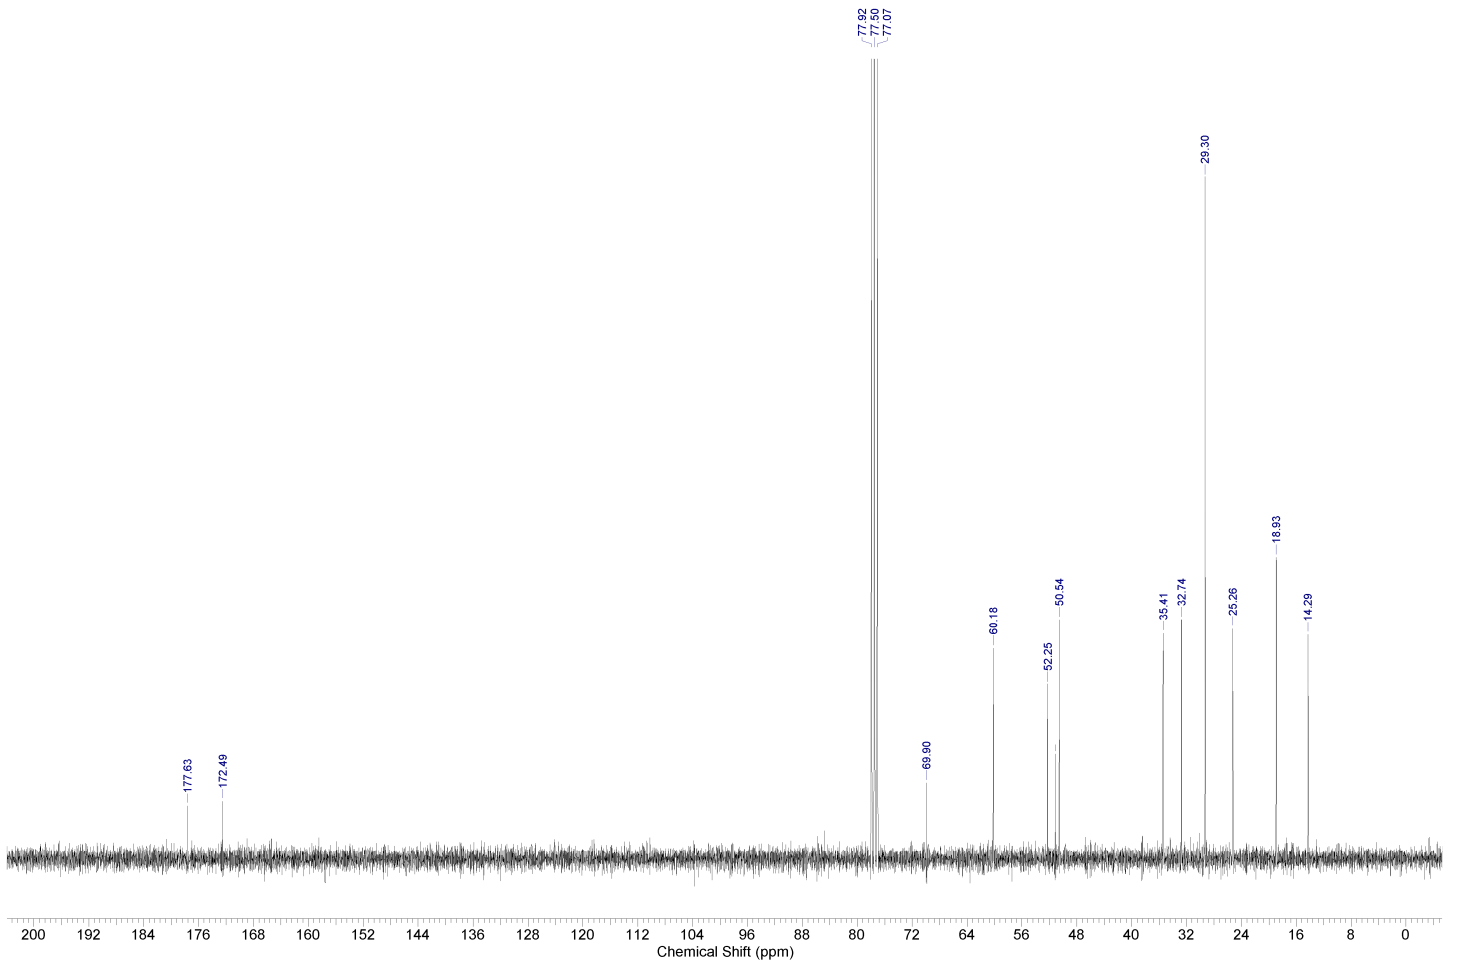

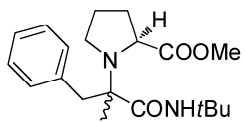

1w, major isomer

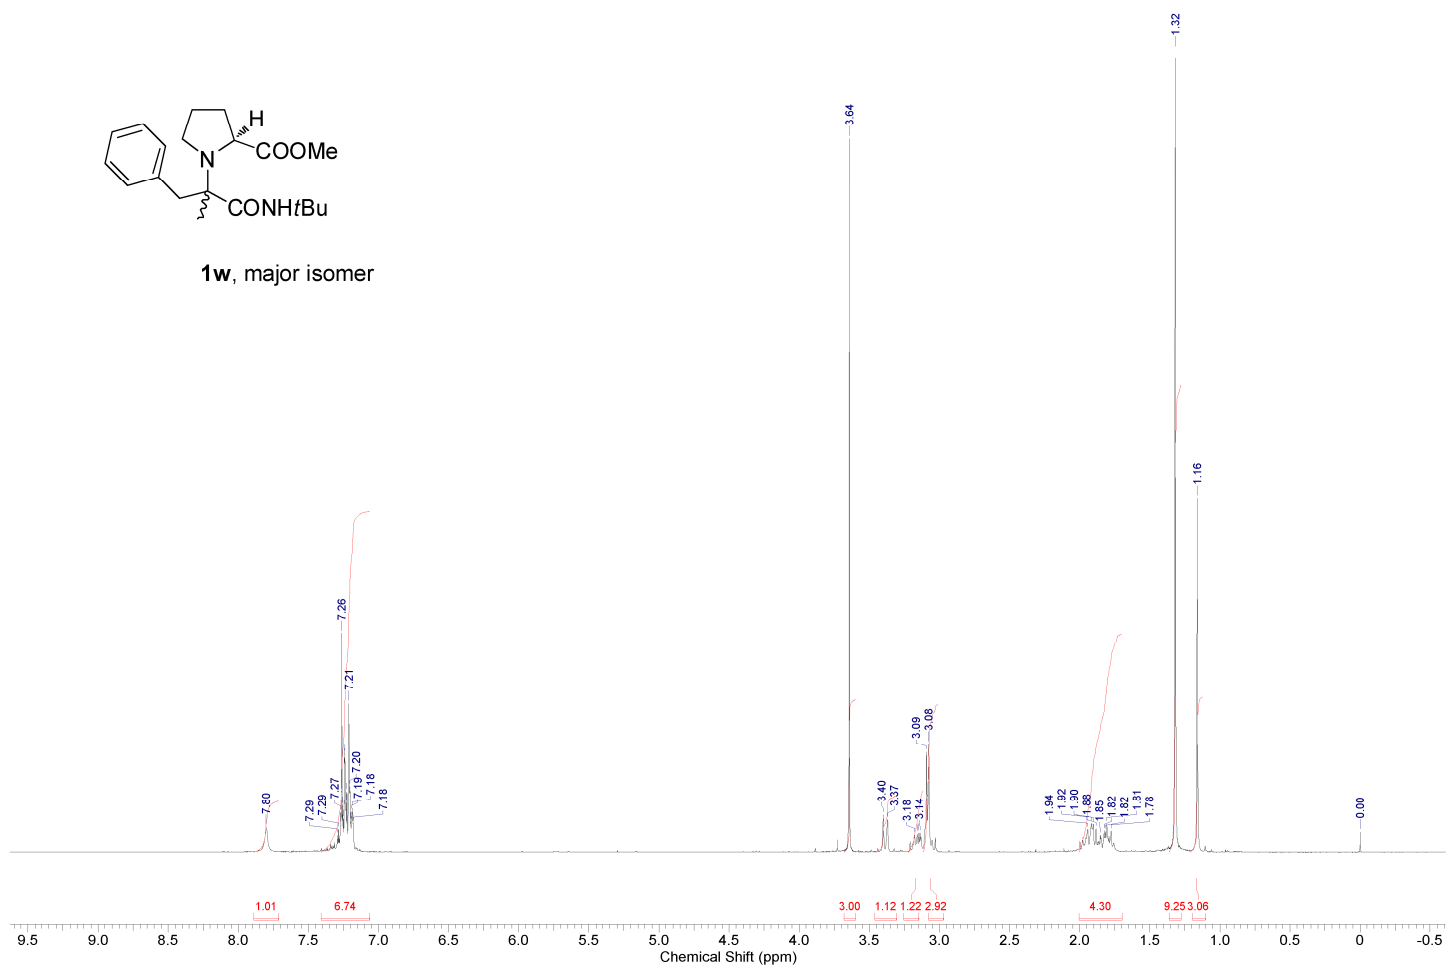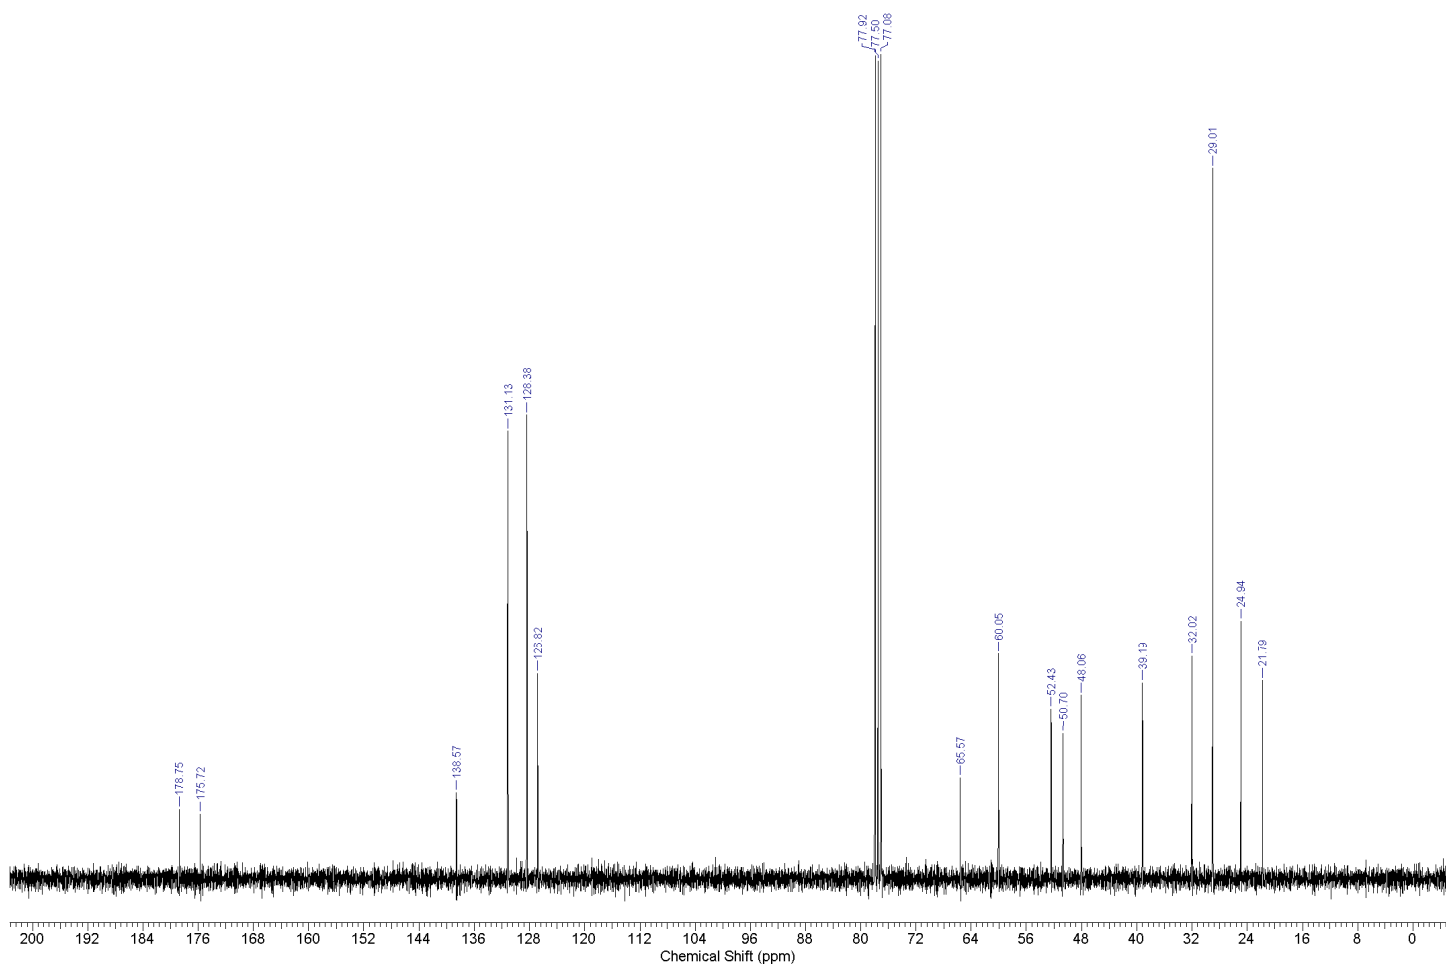

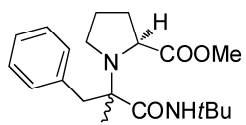

1w, minor isomer

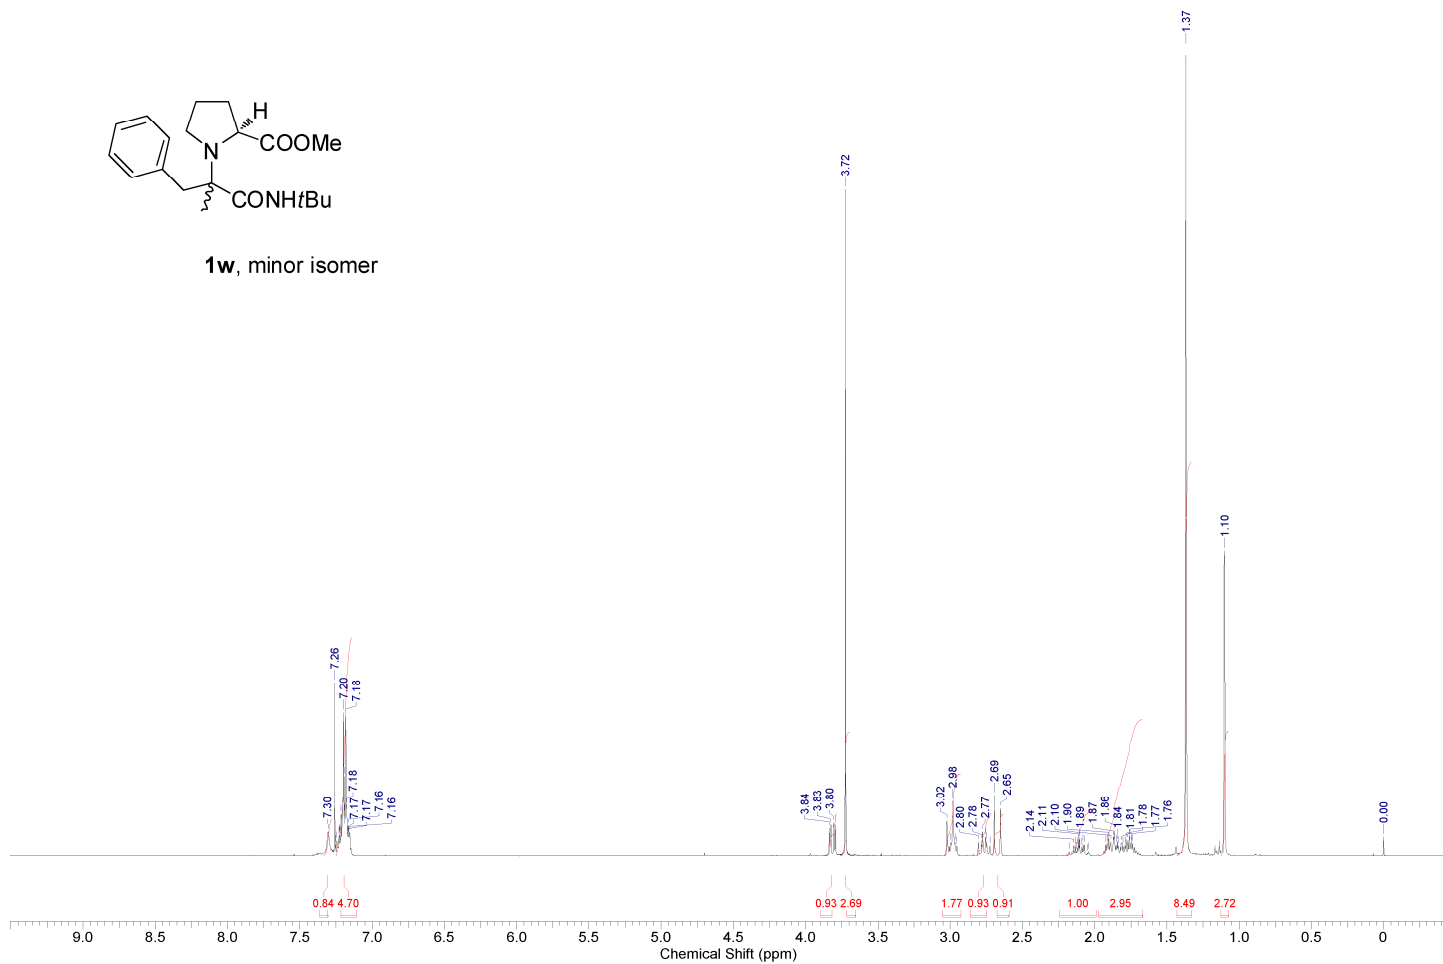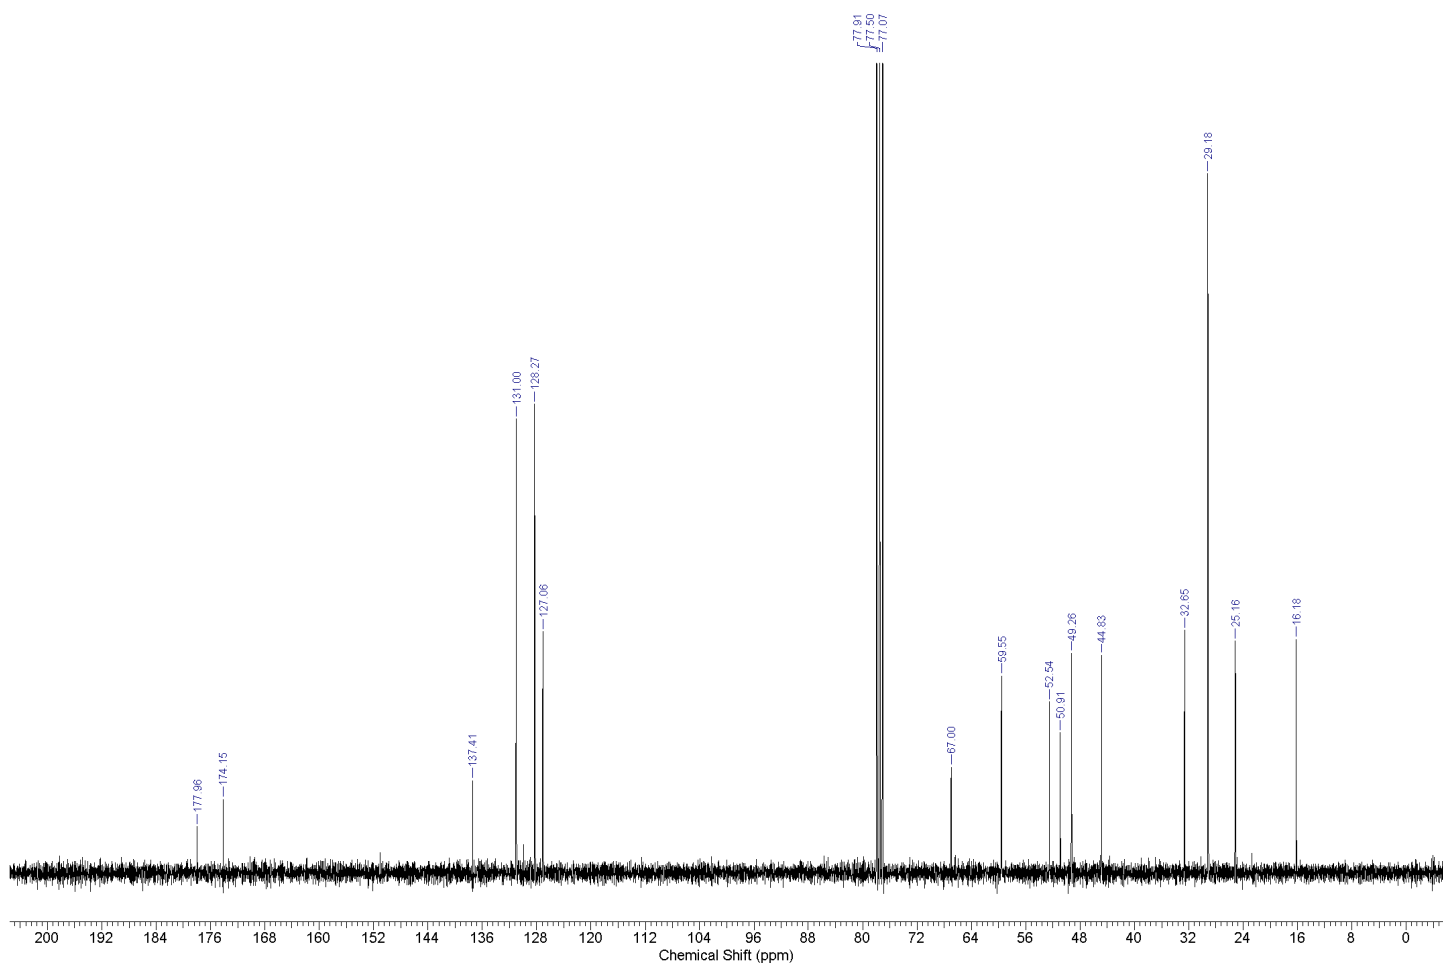

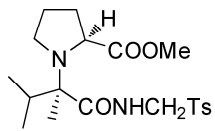

(2S,1R)-1x

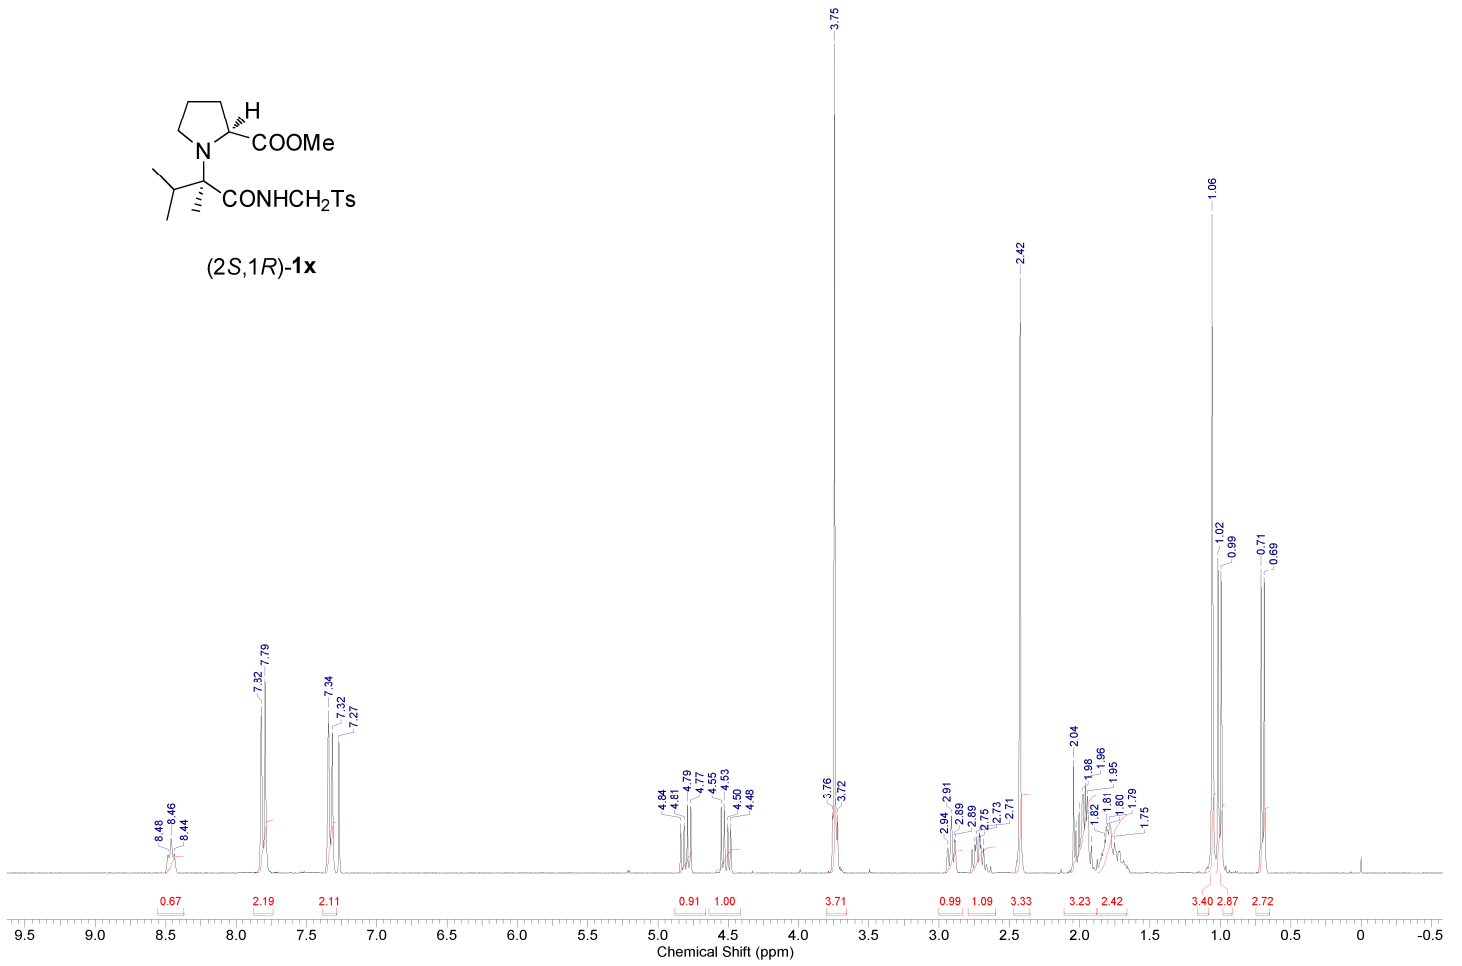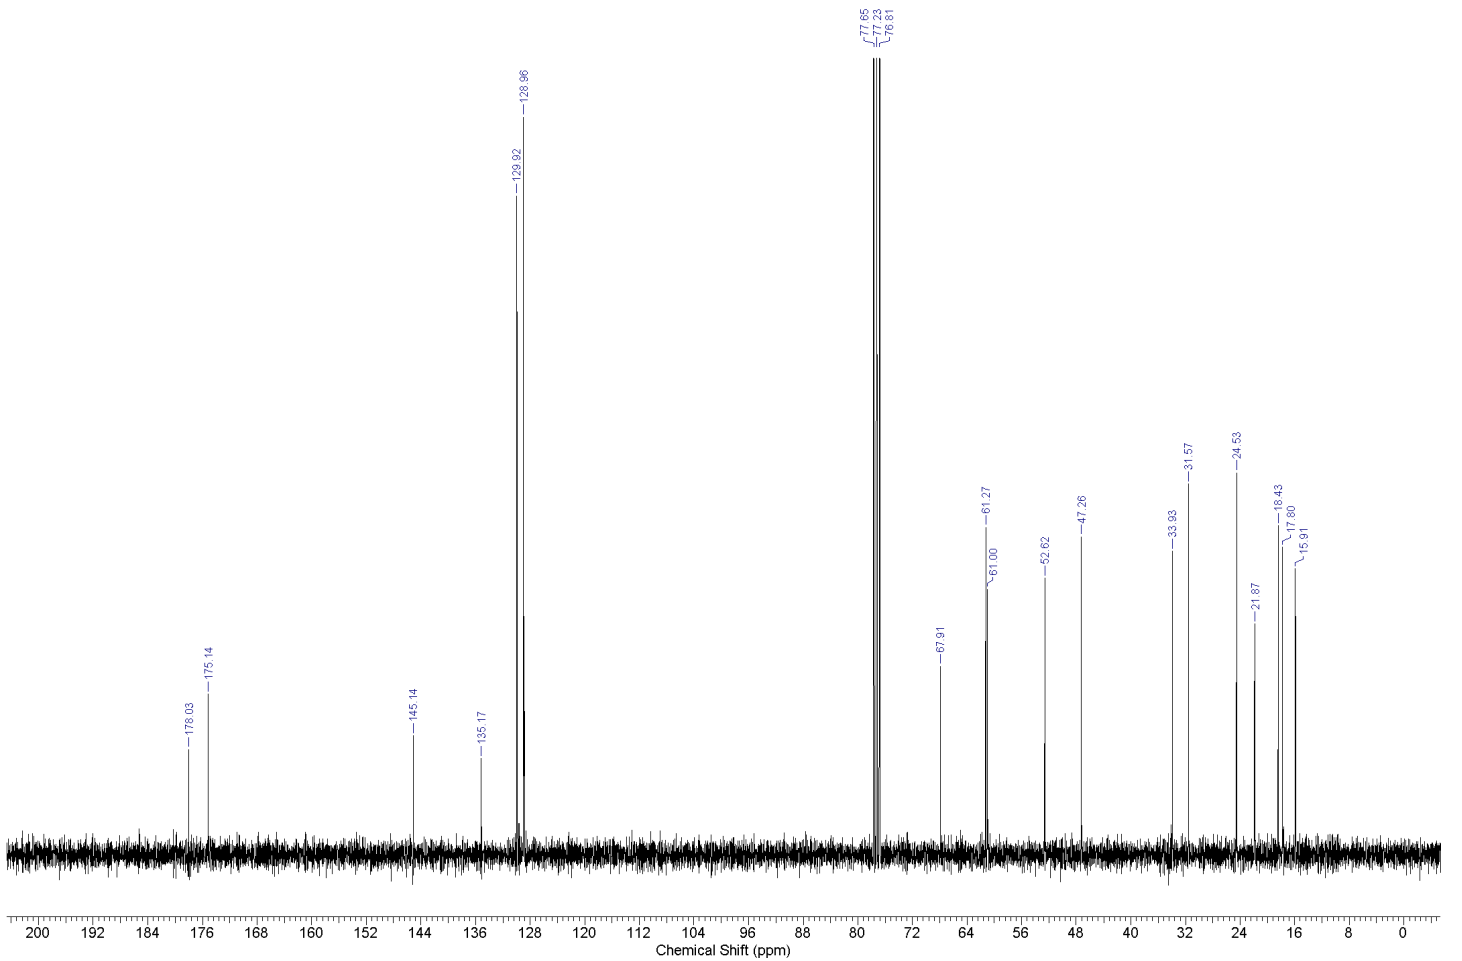



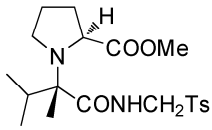

(2S,1S)-1x

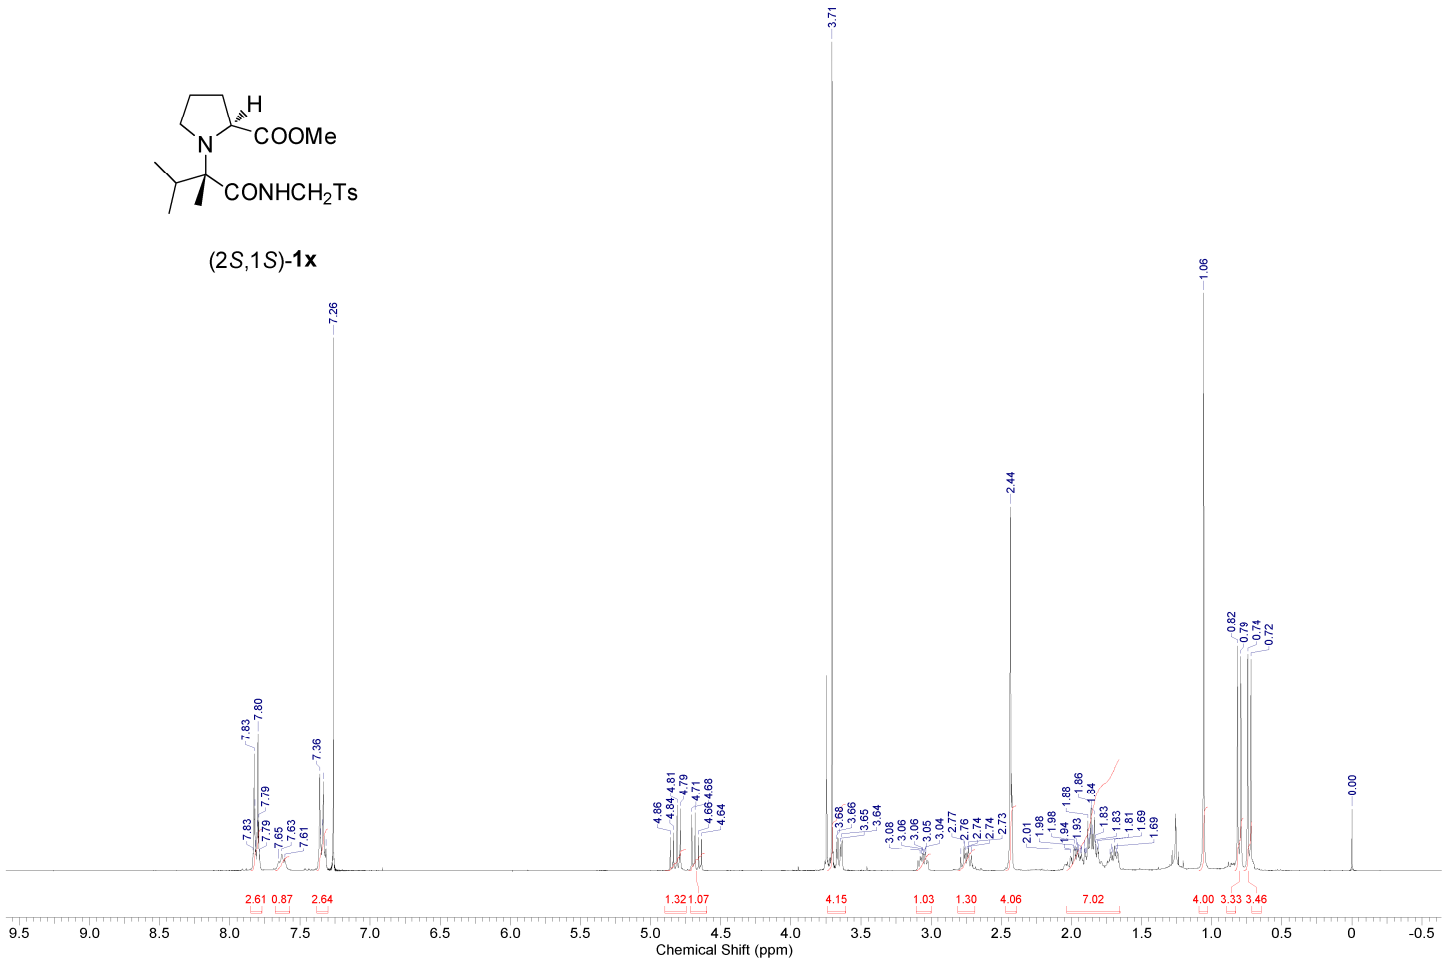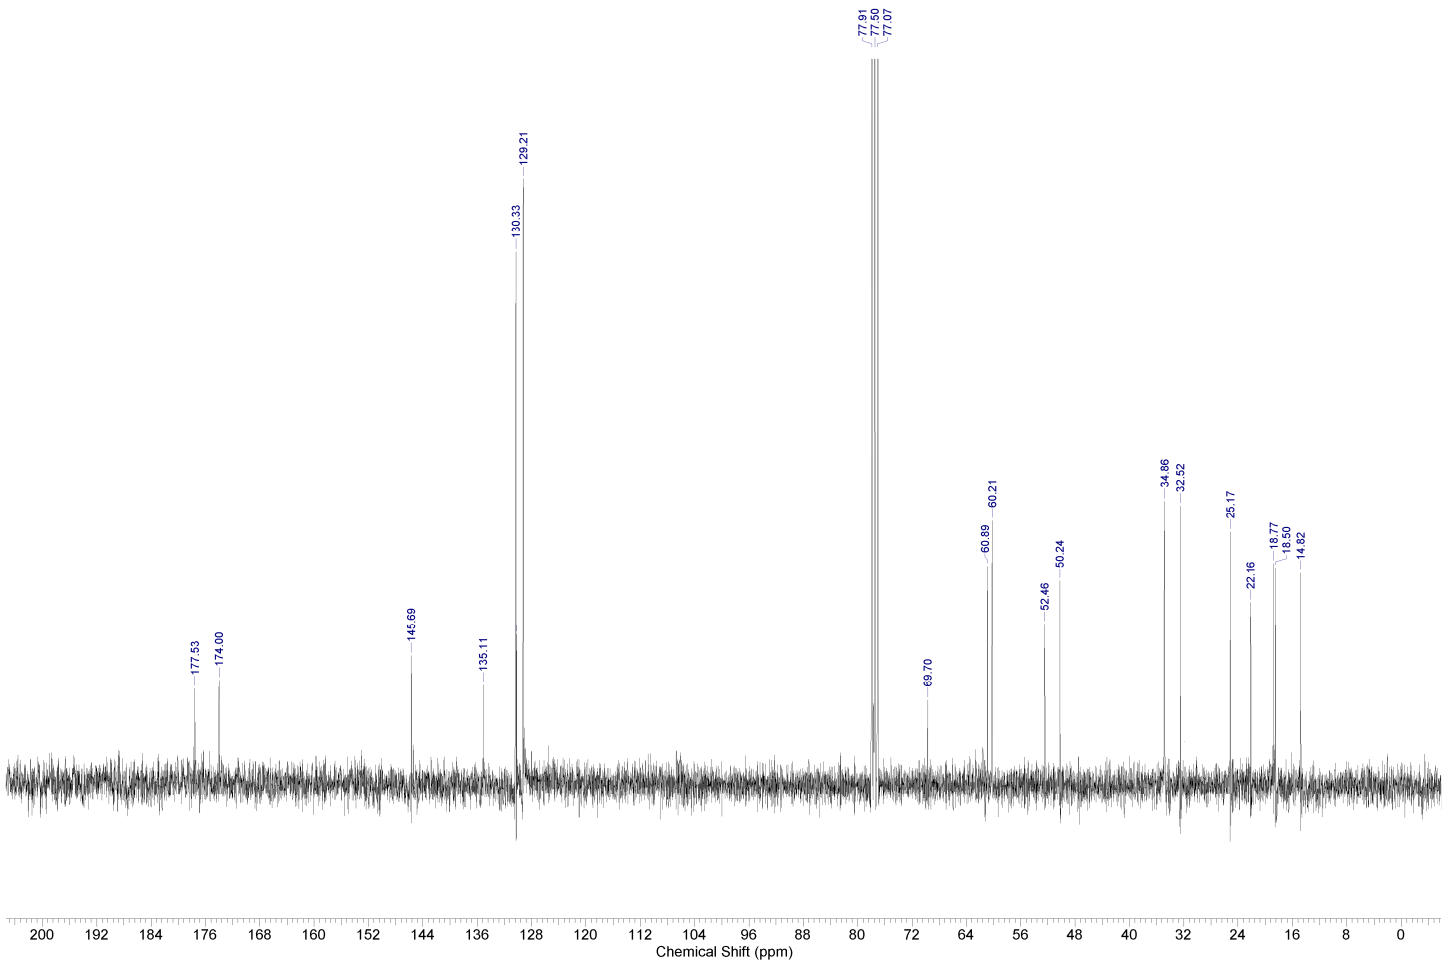

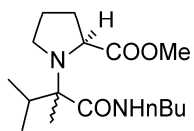

**1y**, major isomer

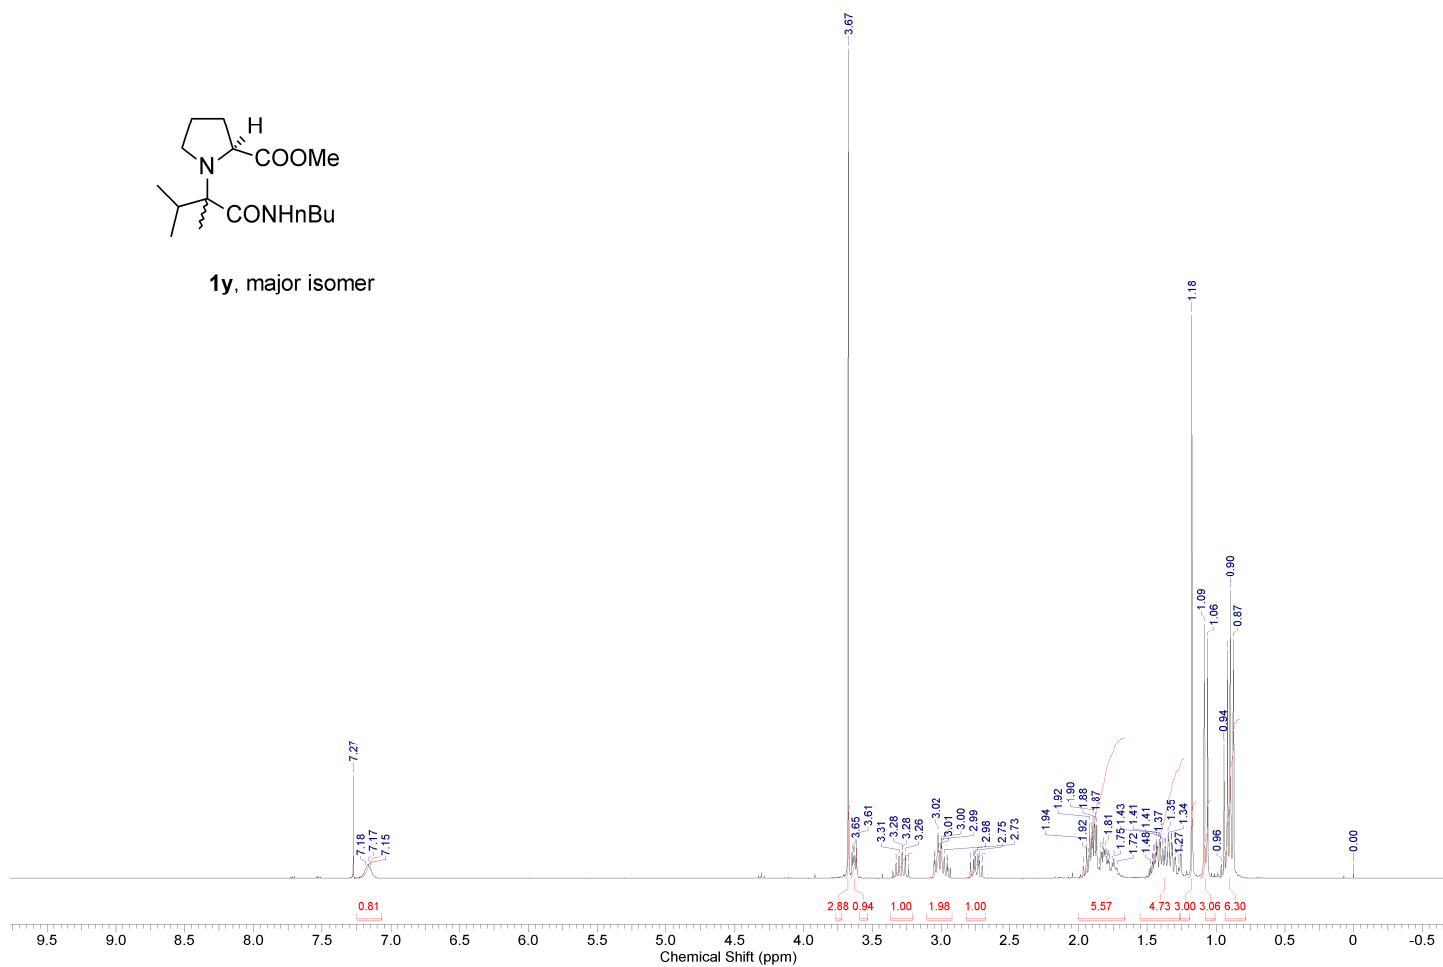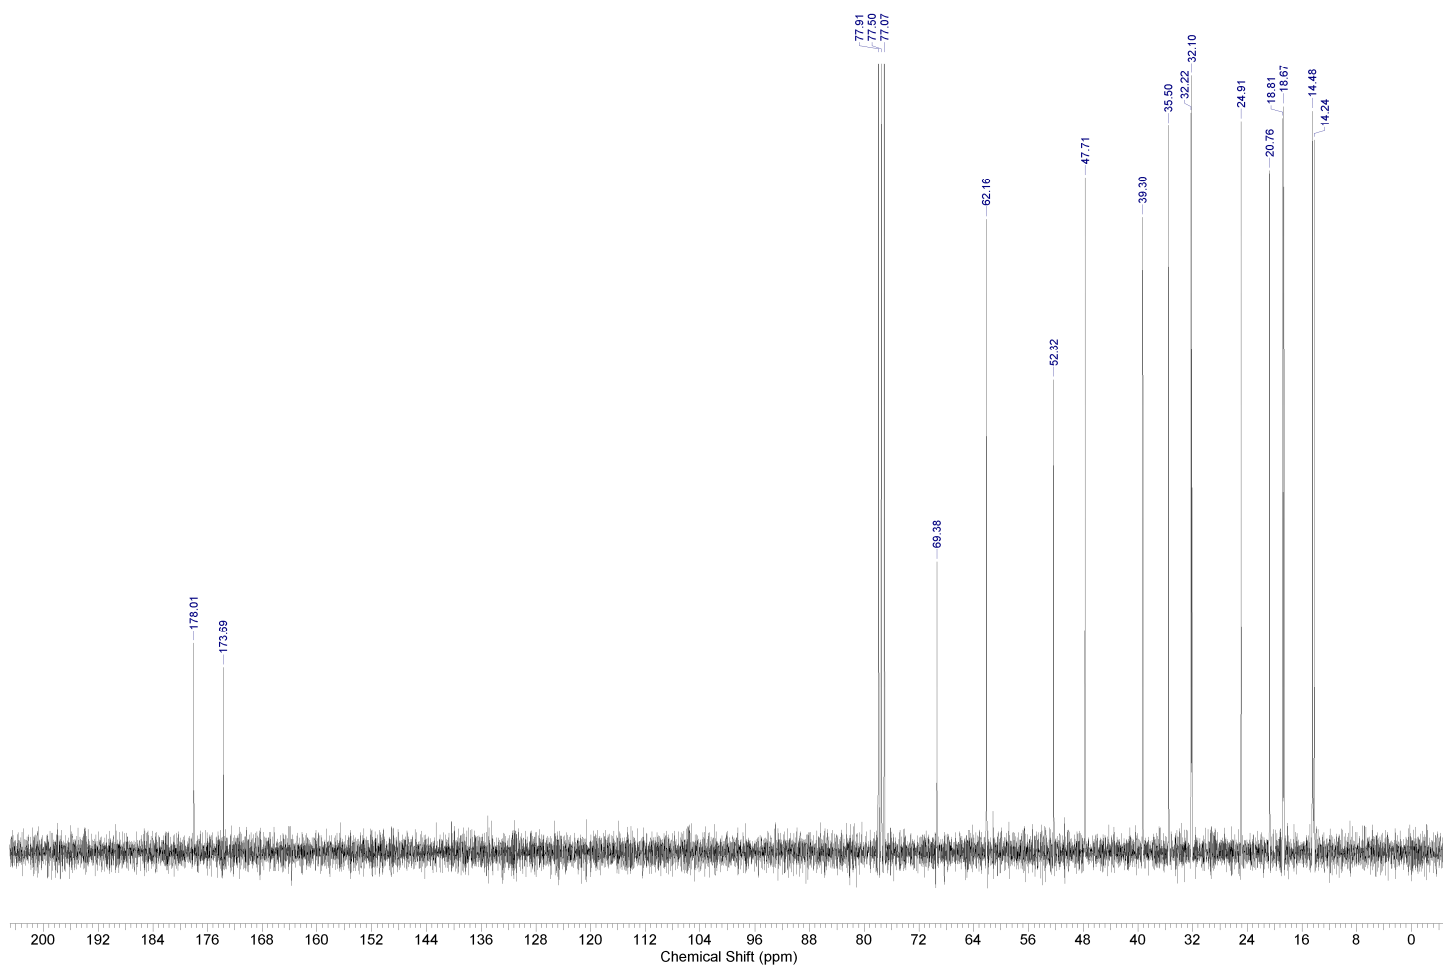

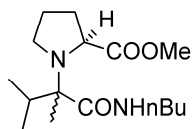

**1y**, minor isomer

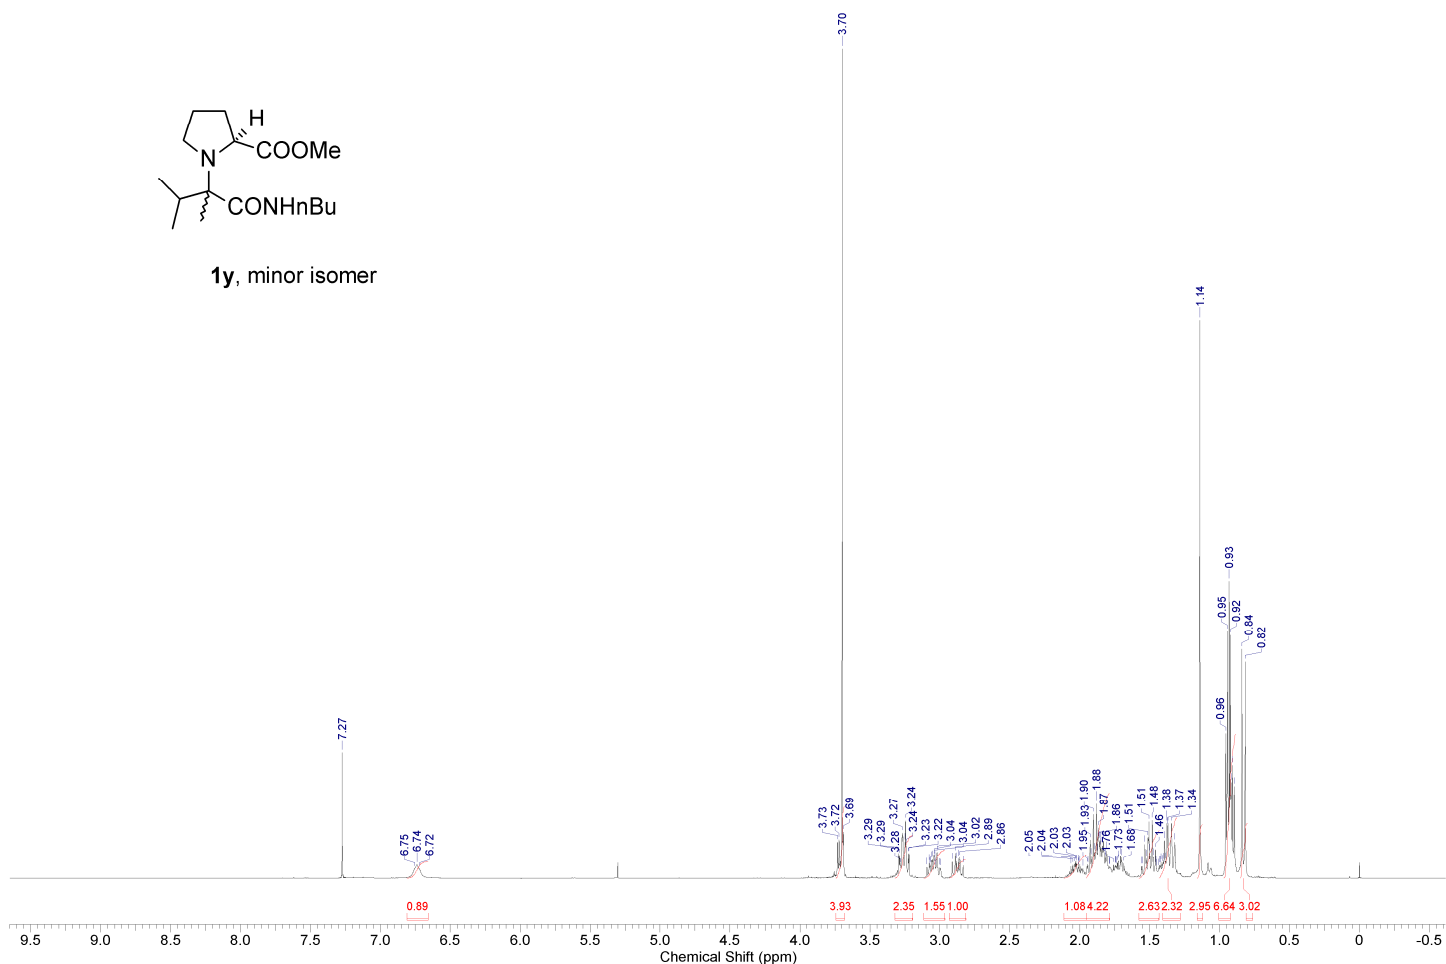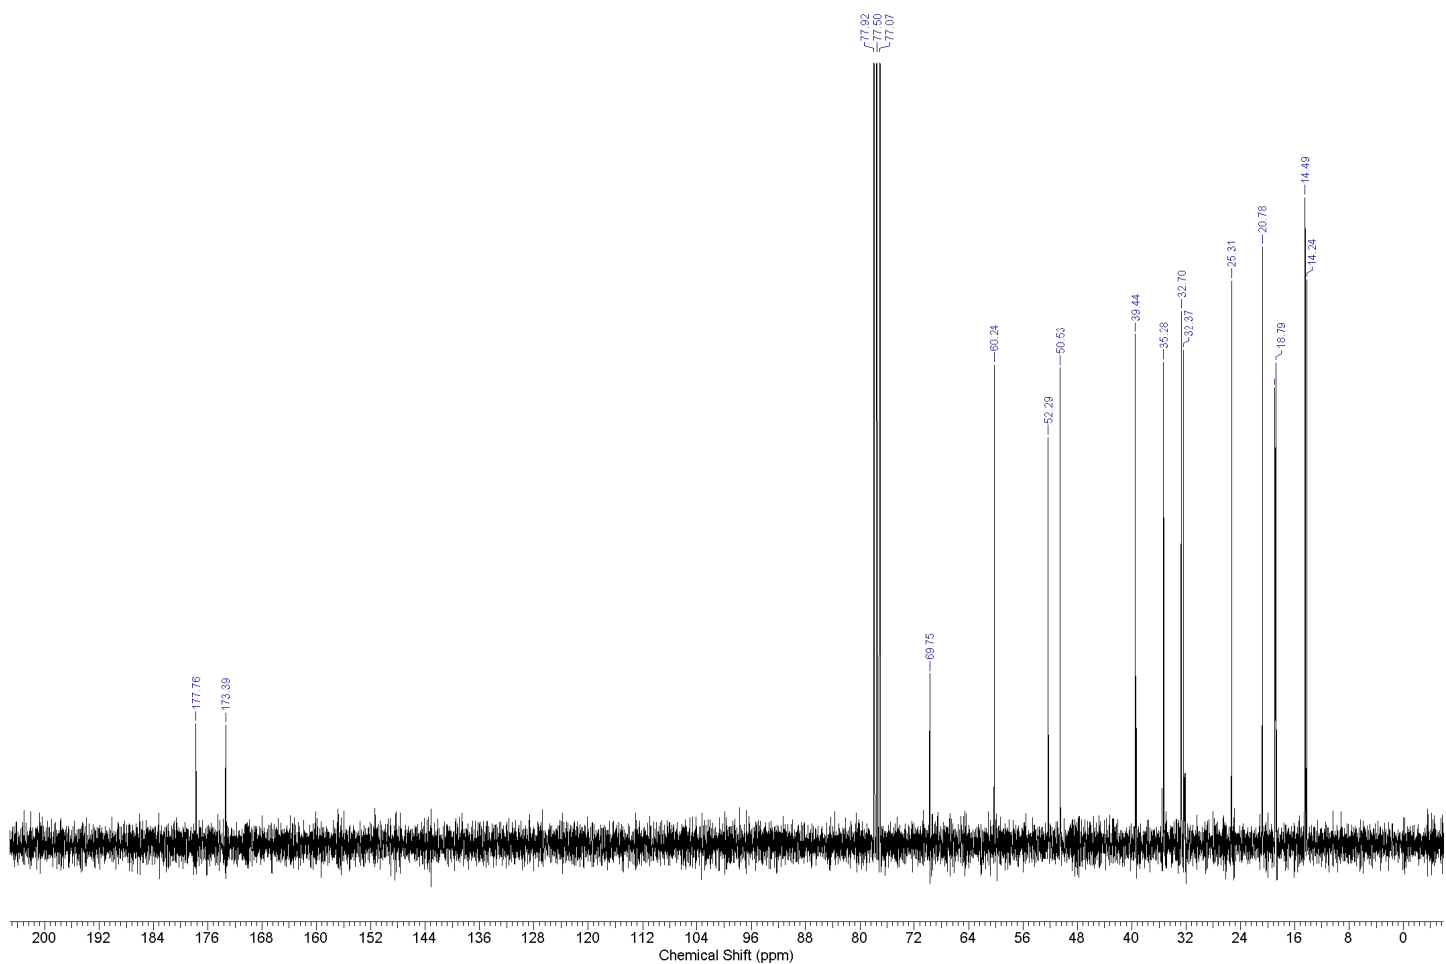

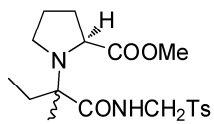

1z, major isomer

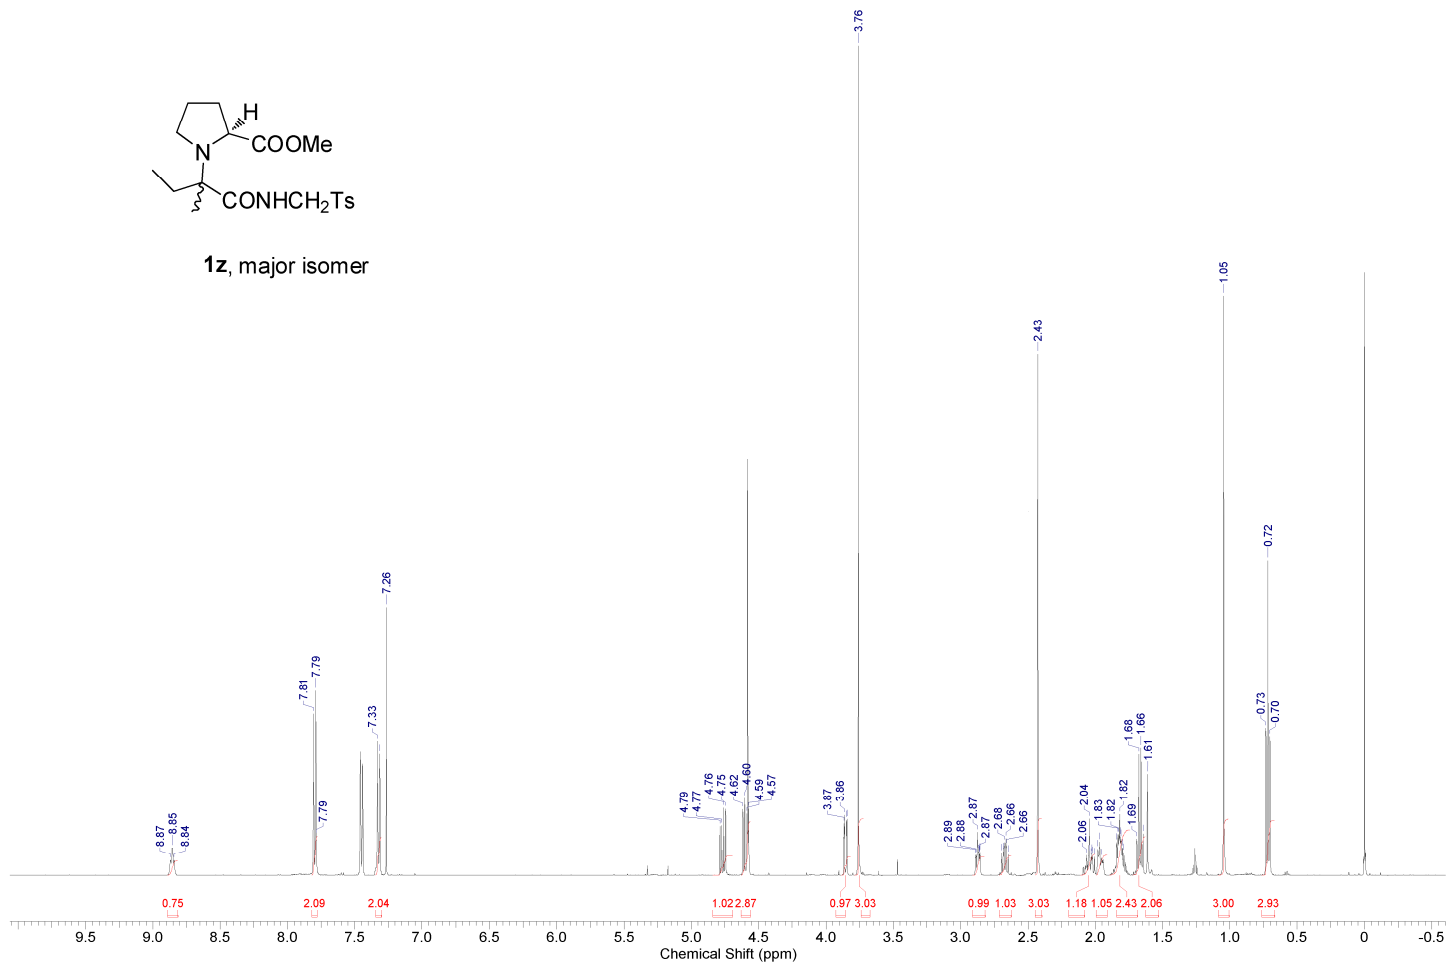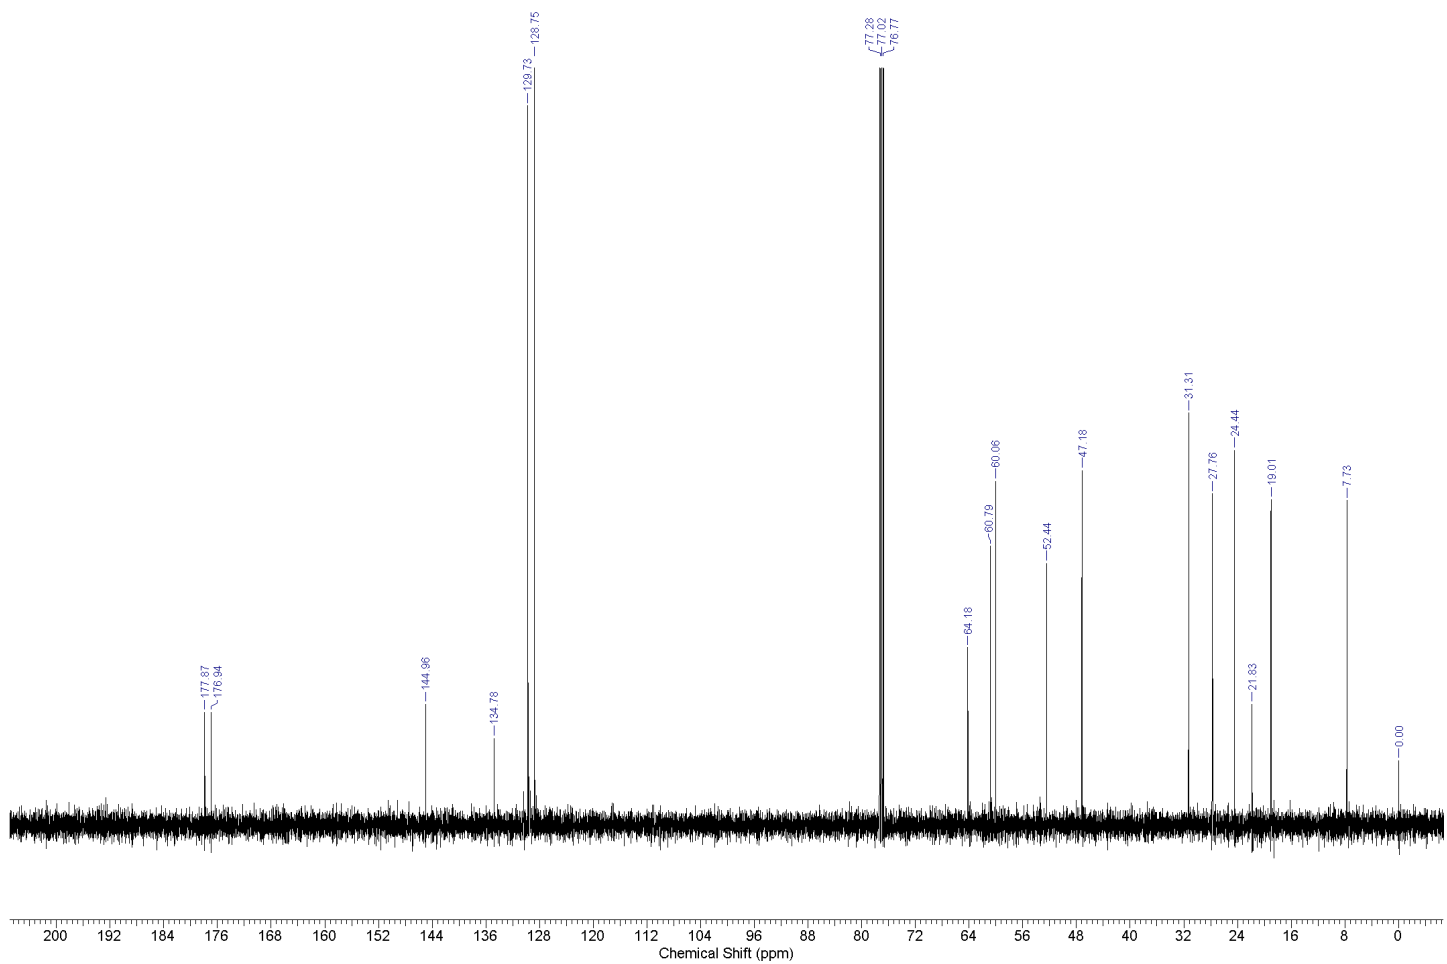

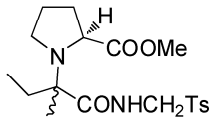

1z, minor isomer

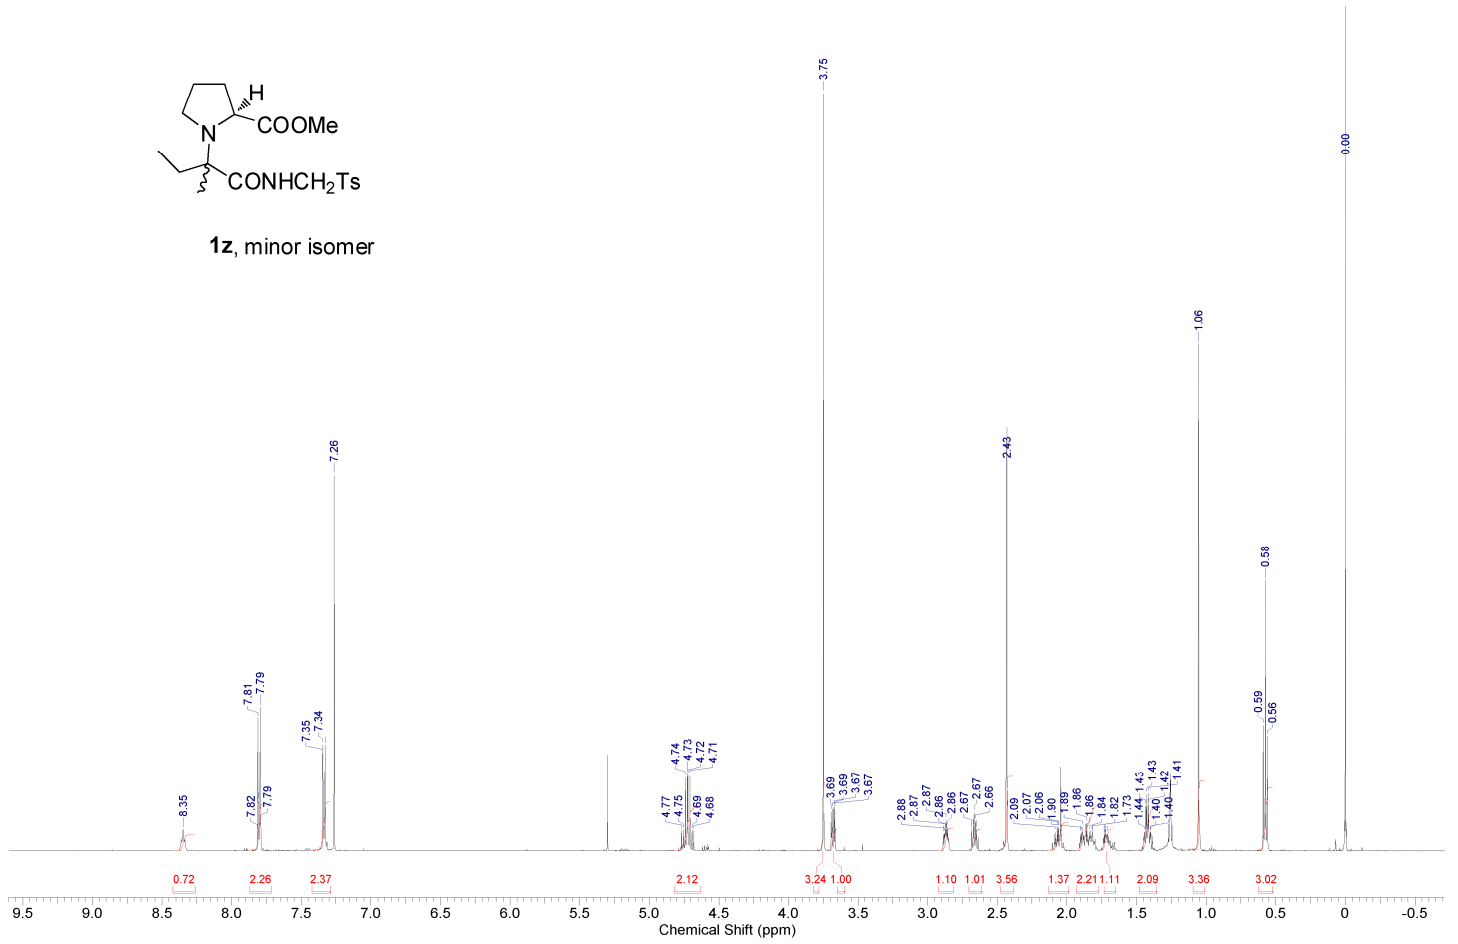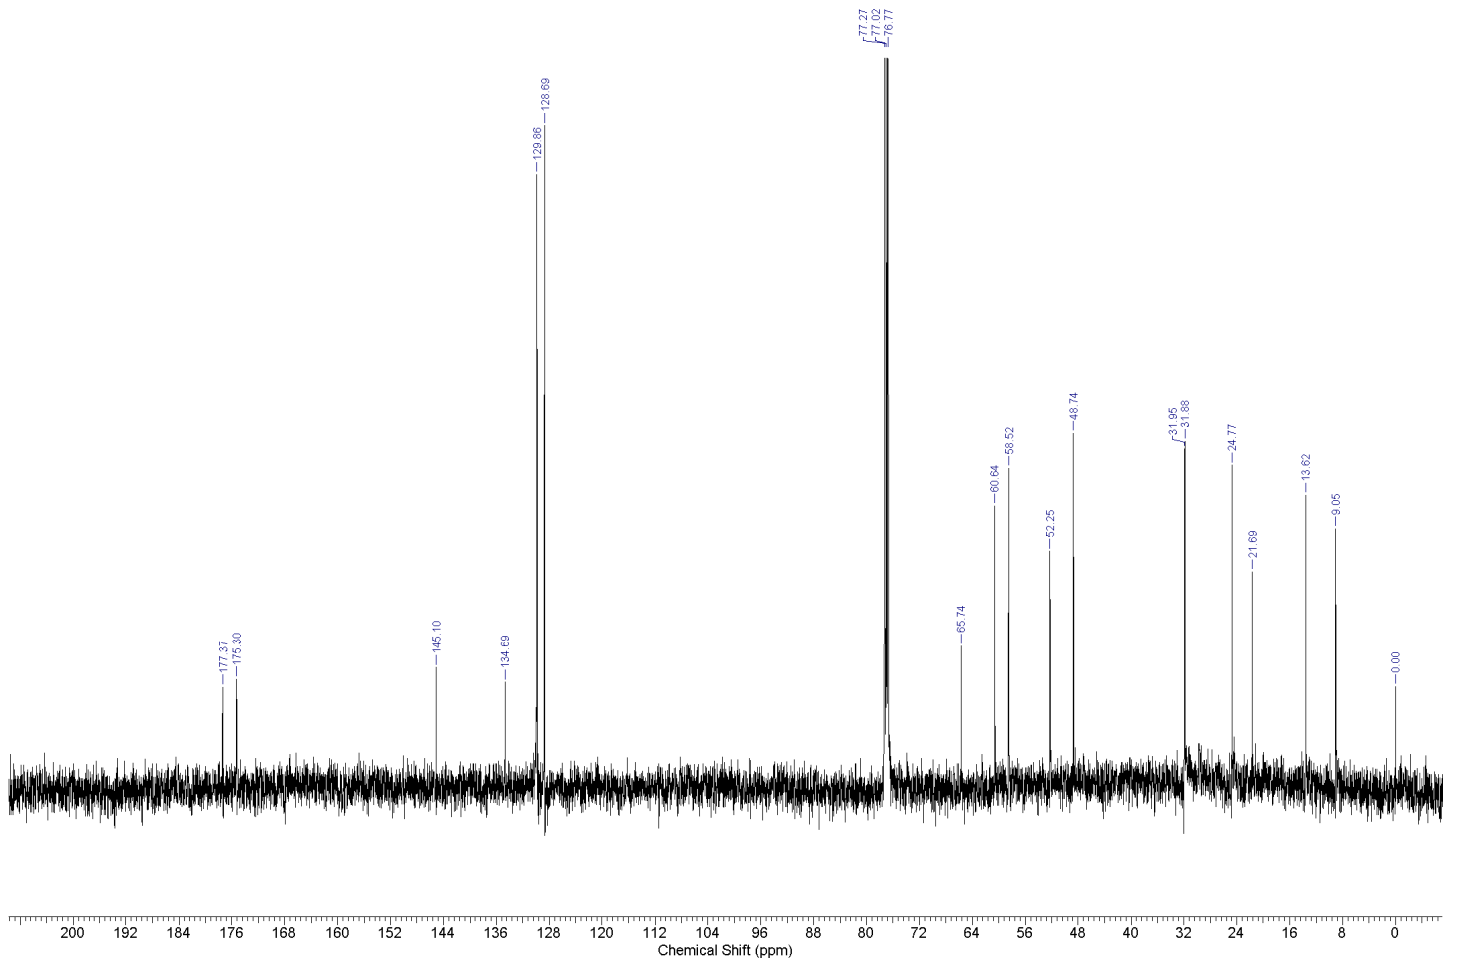

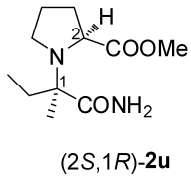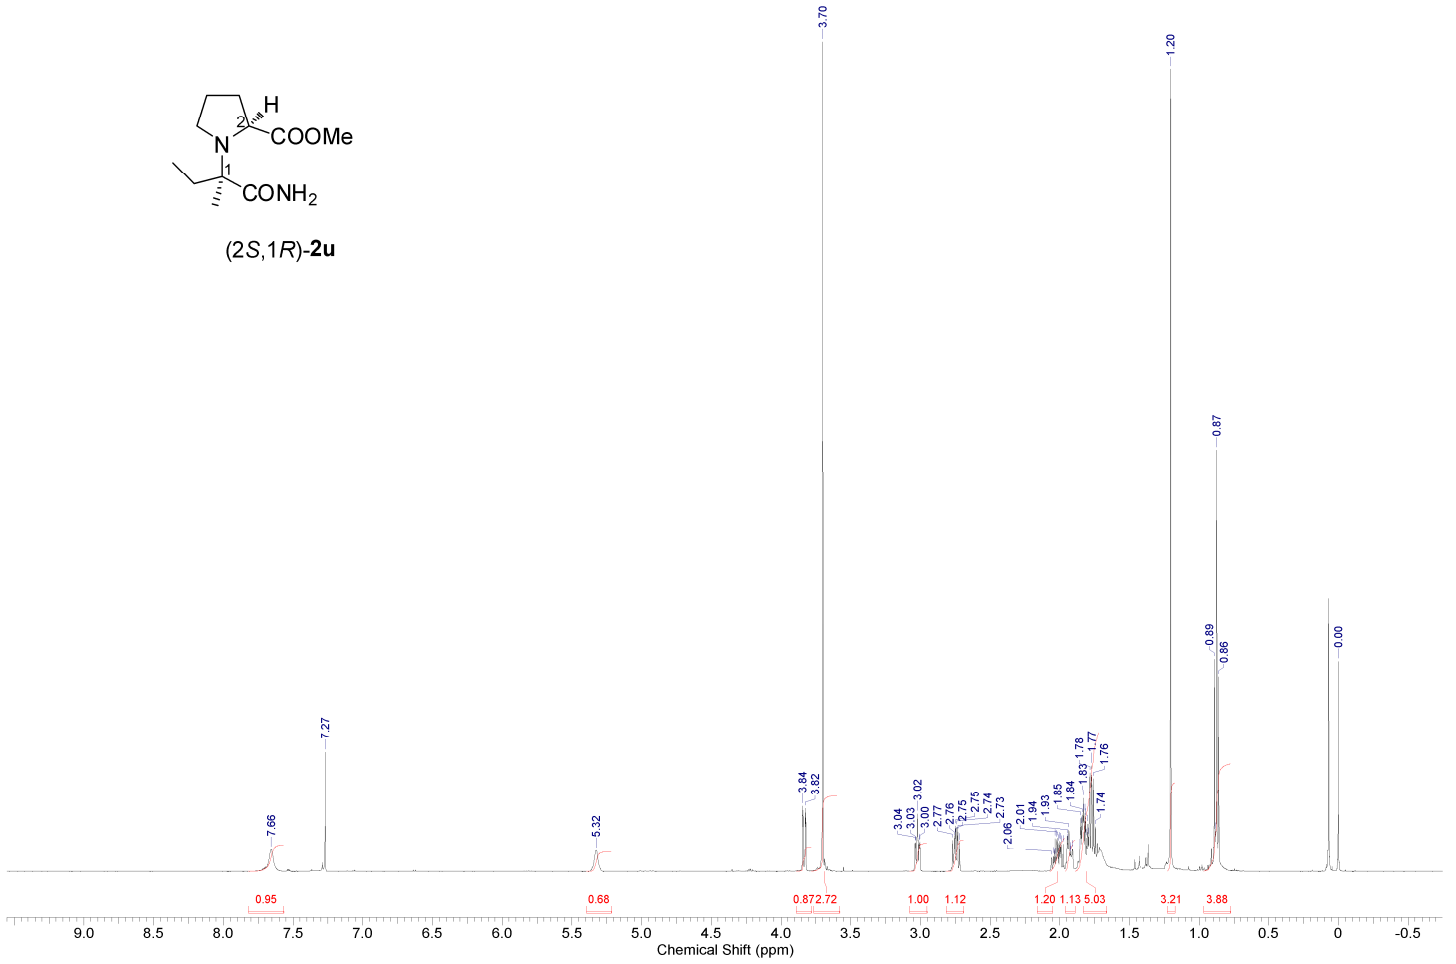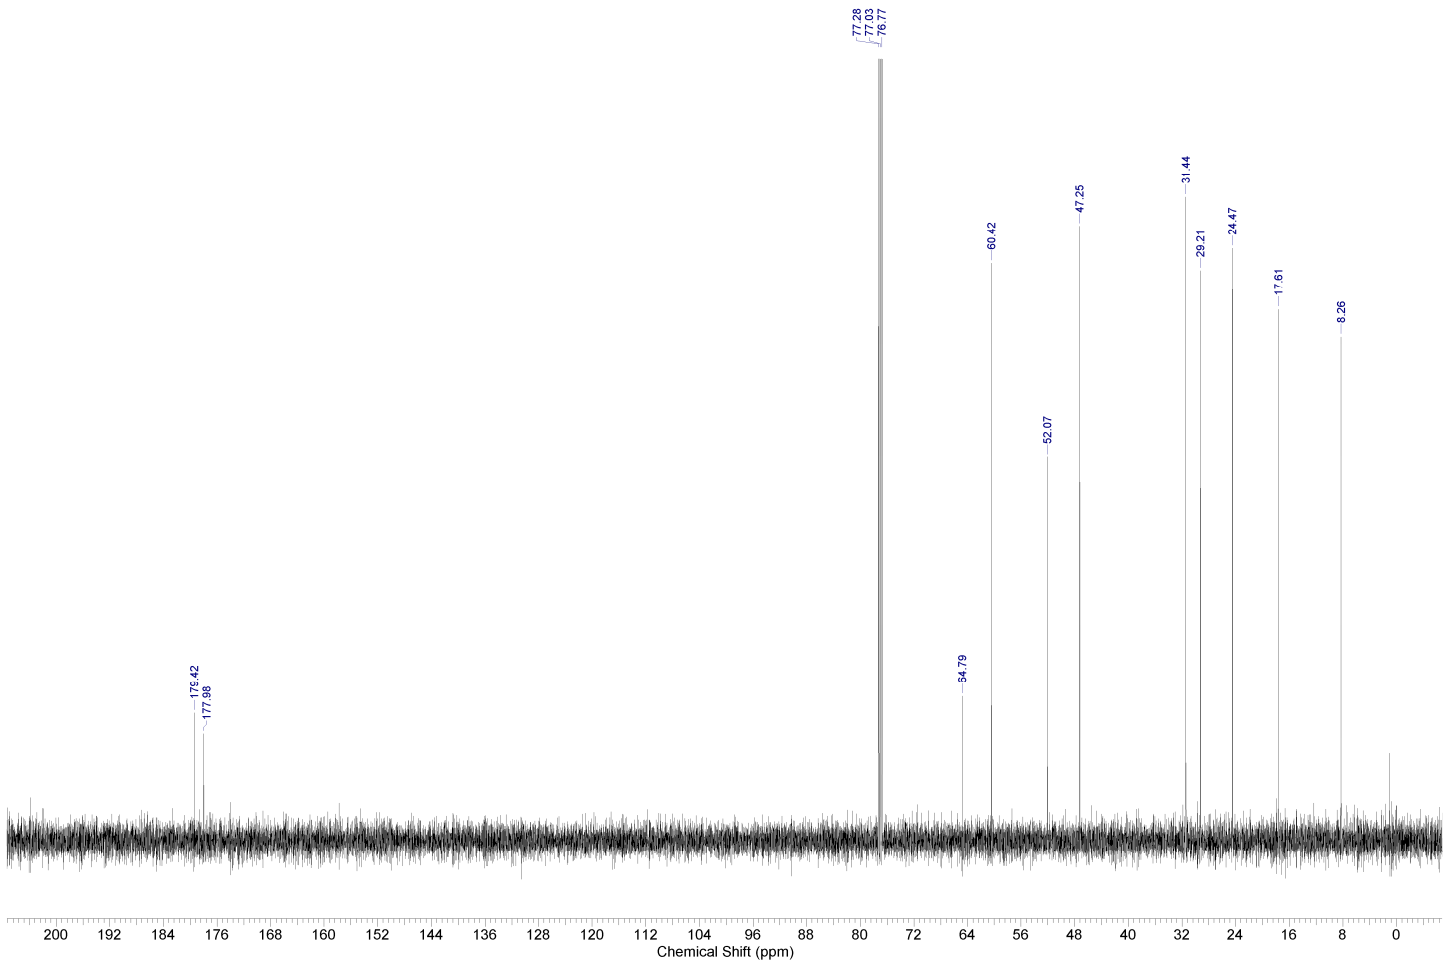

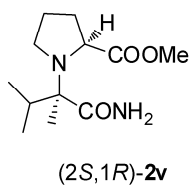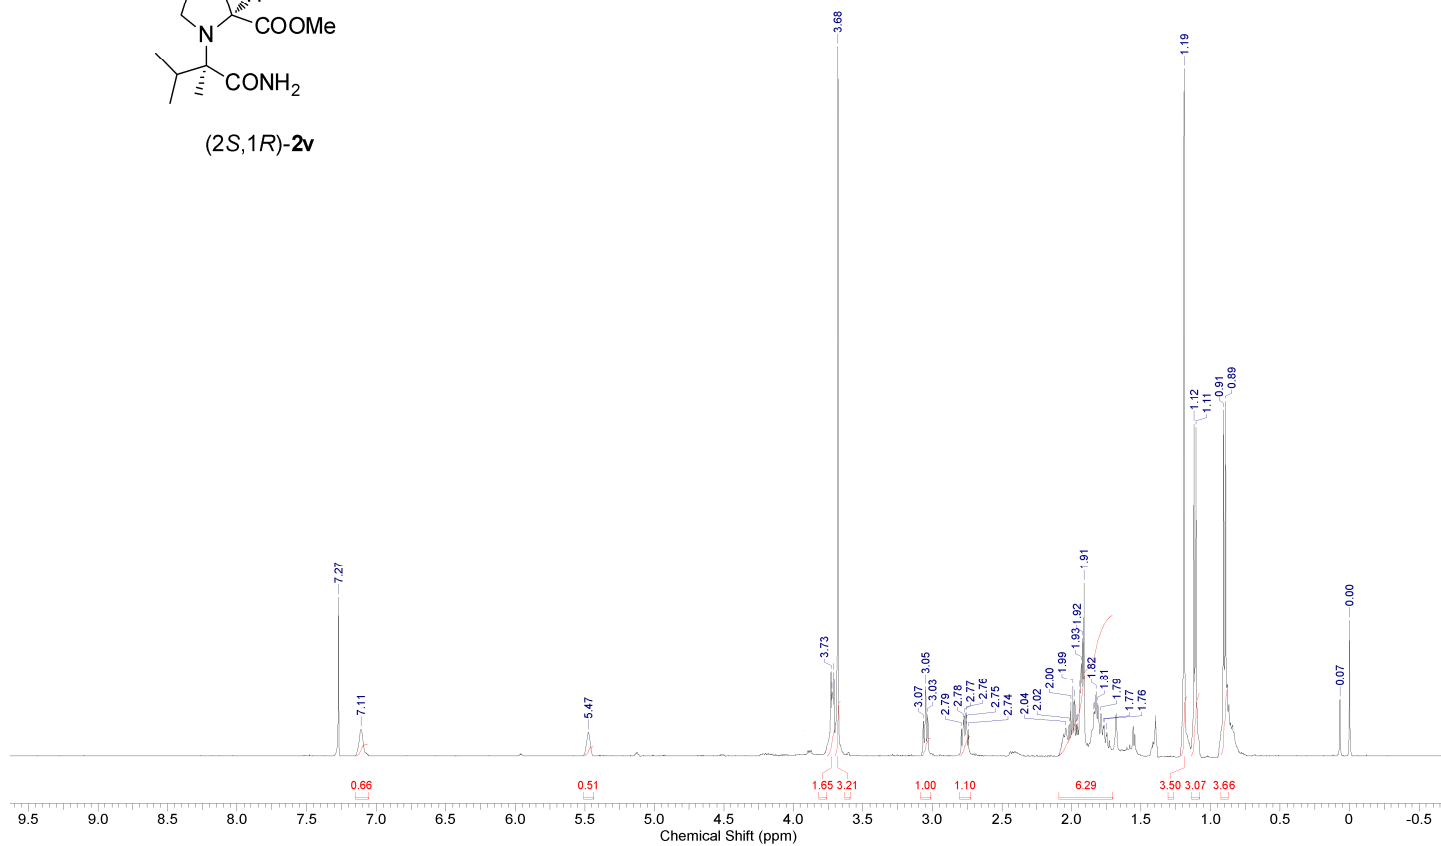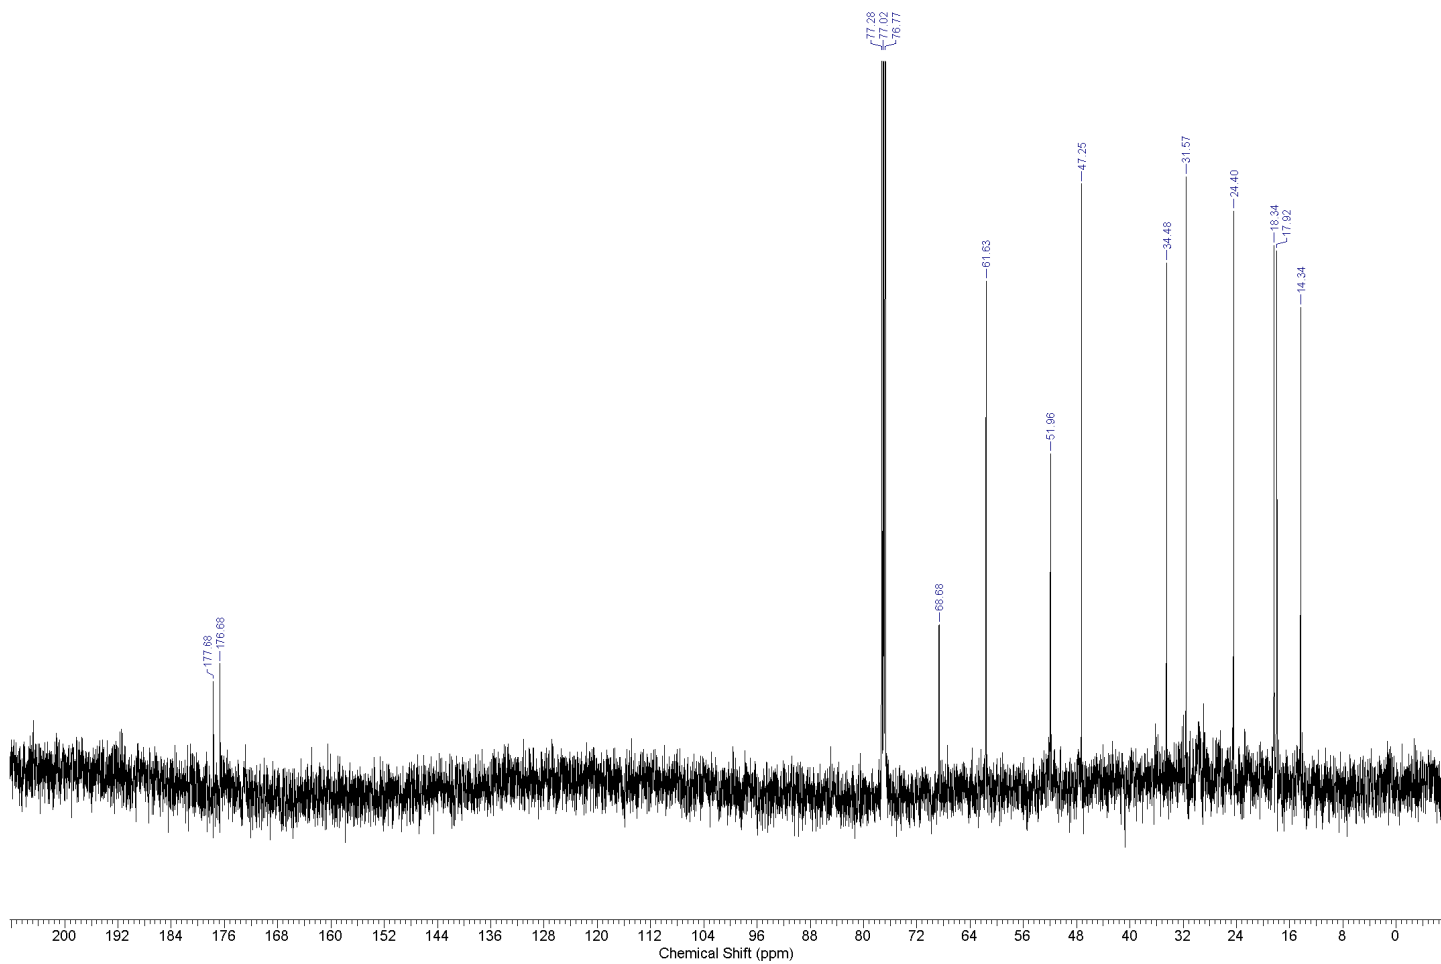

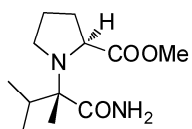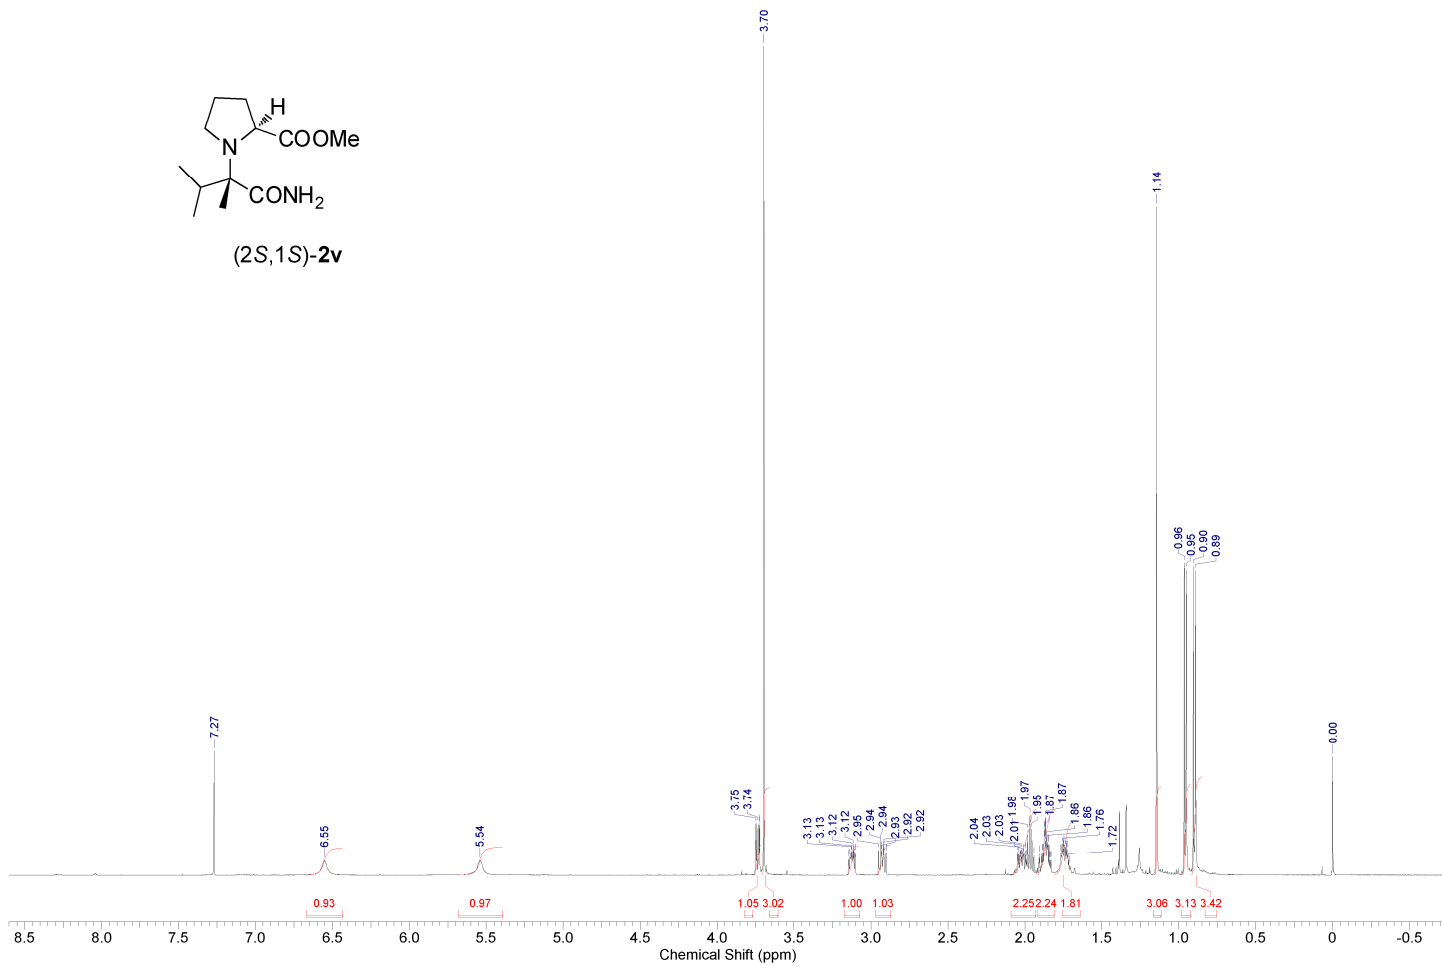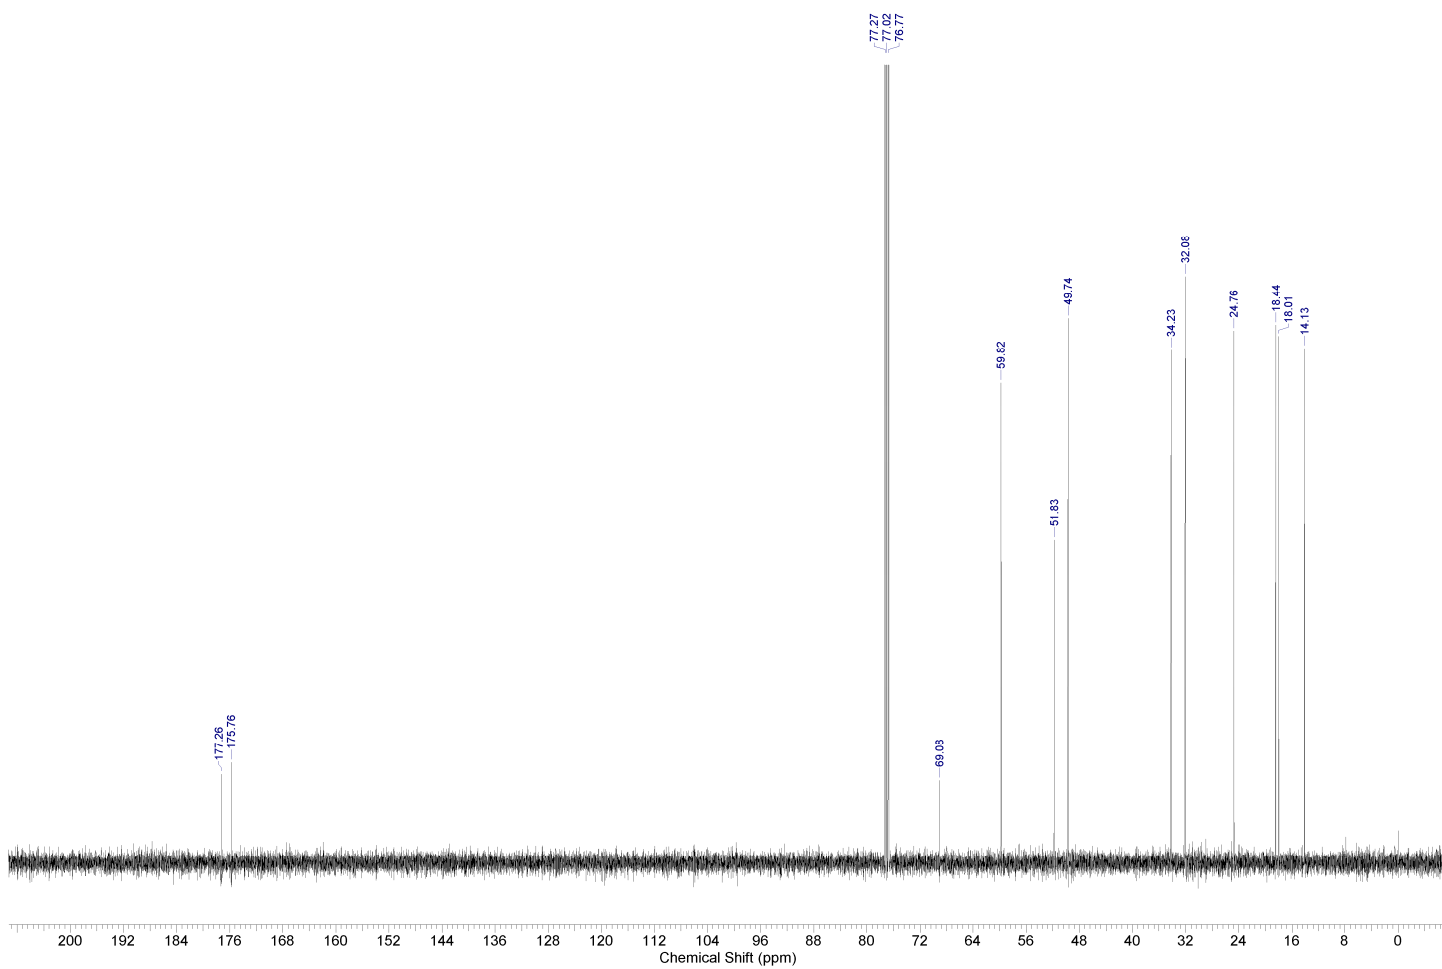



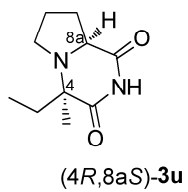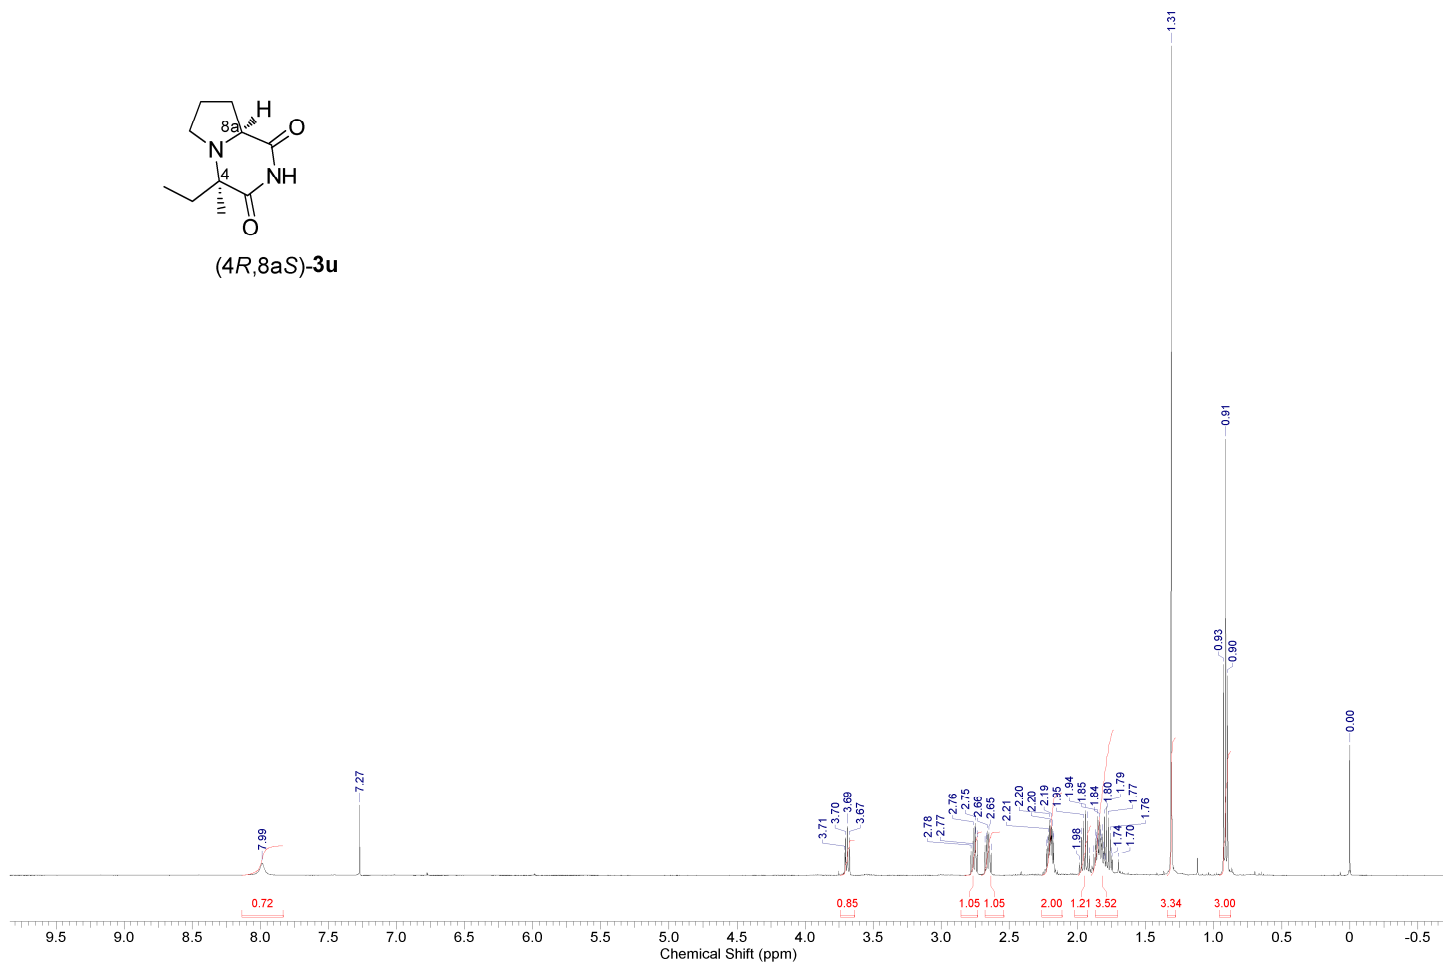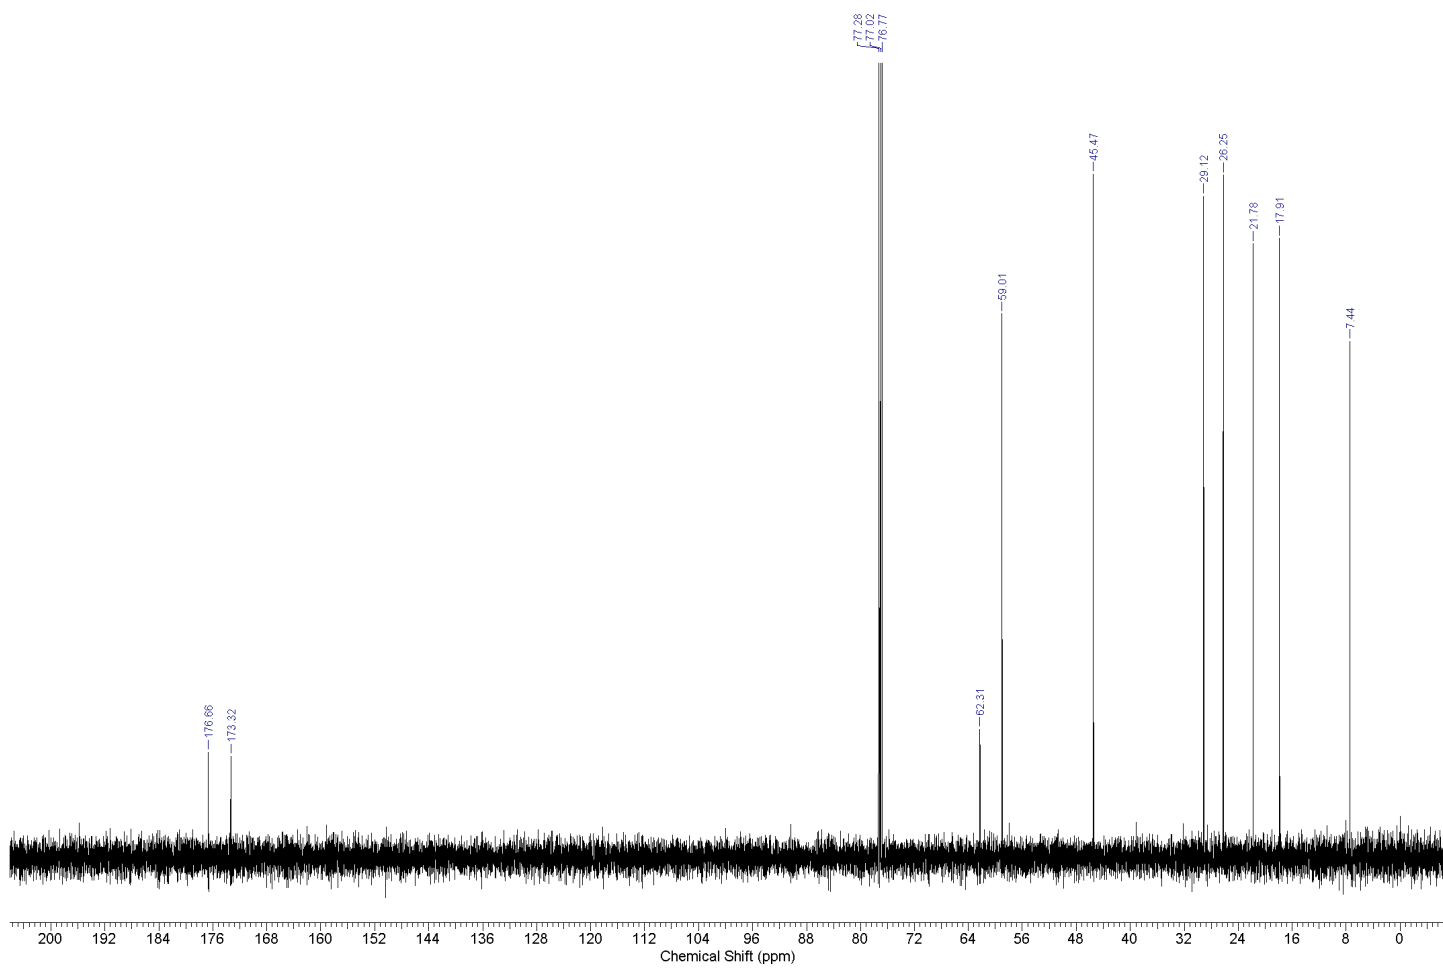

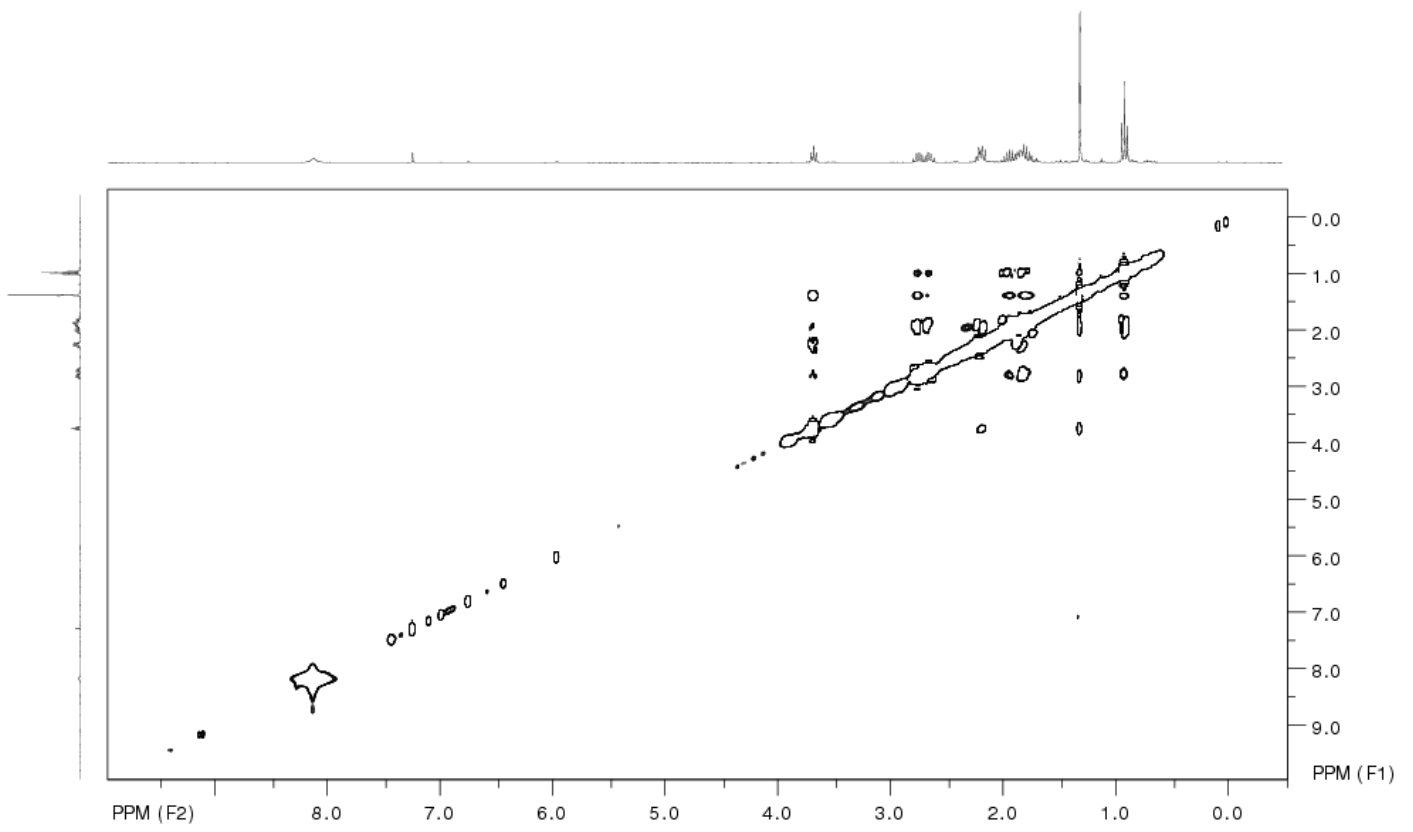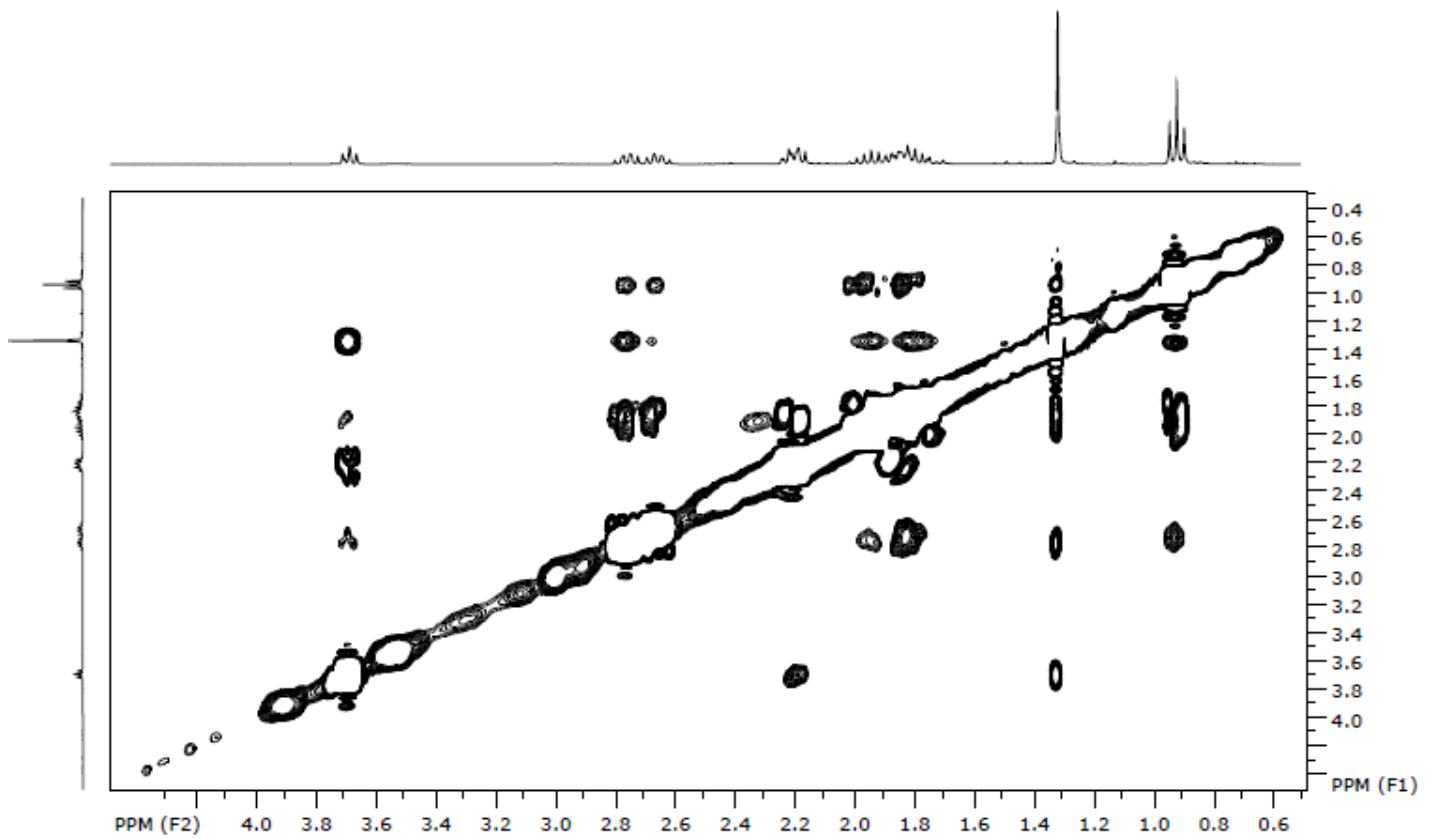

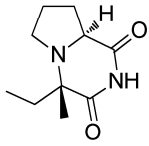

(4*S*,8*aS*)-**3u**

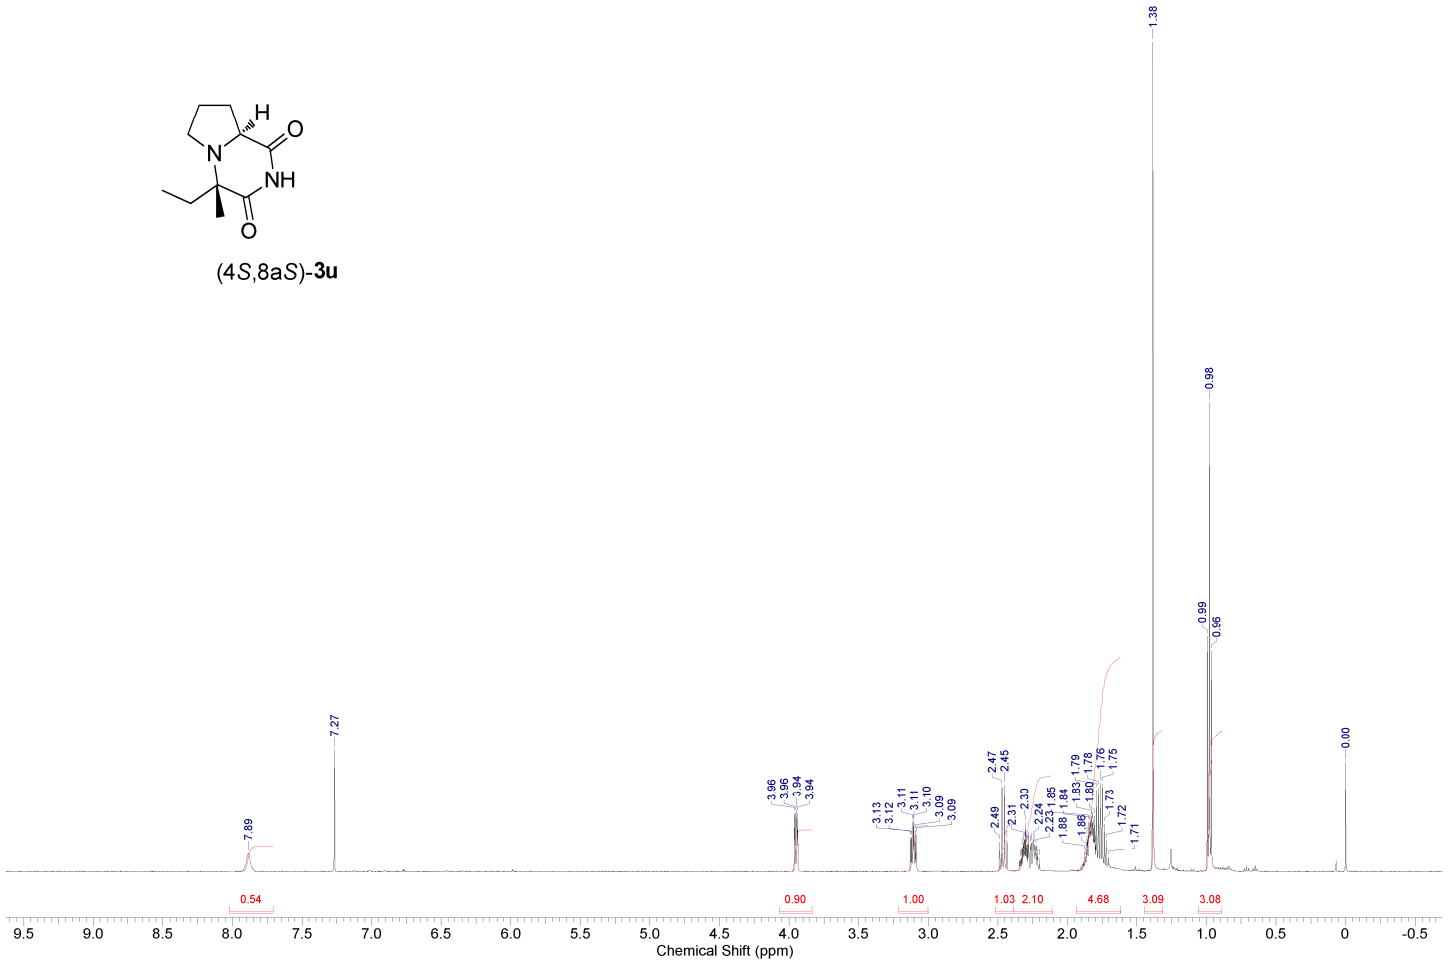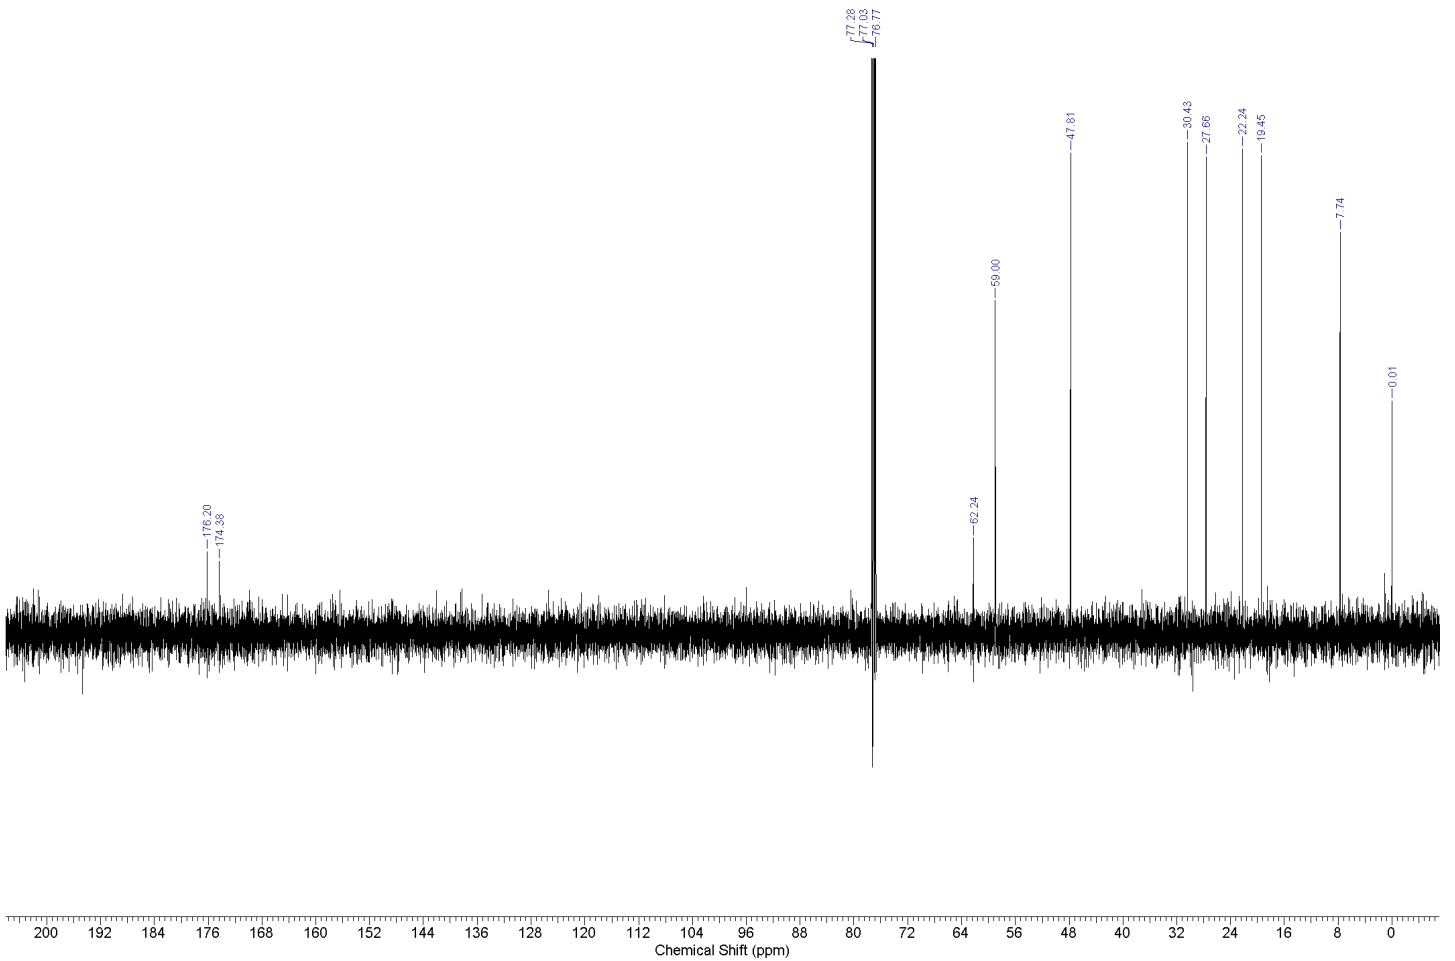

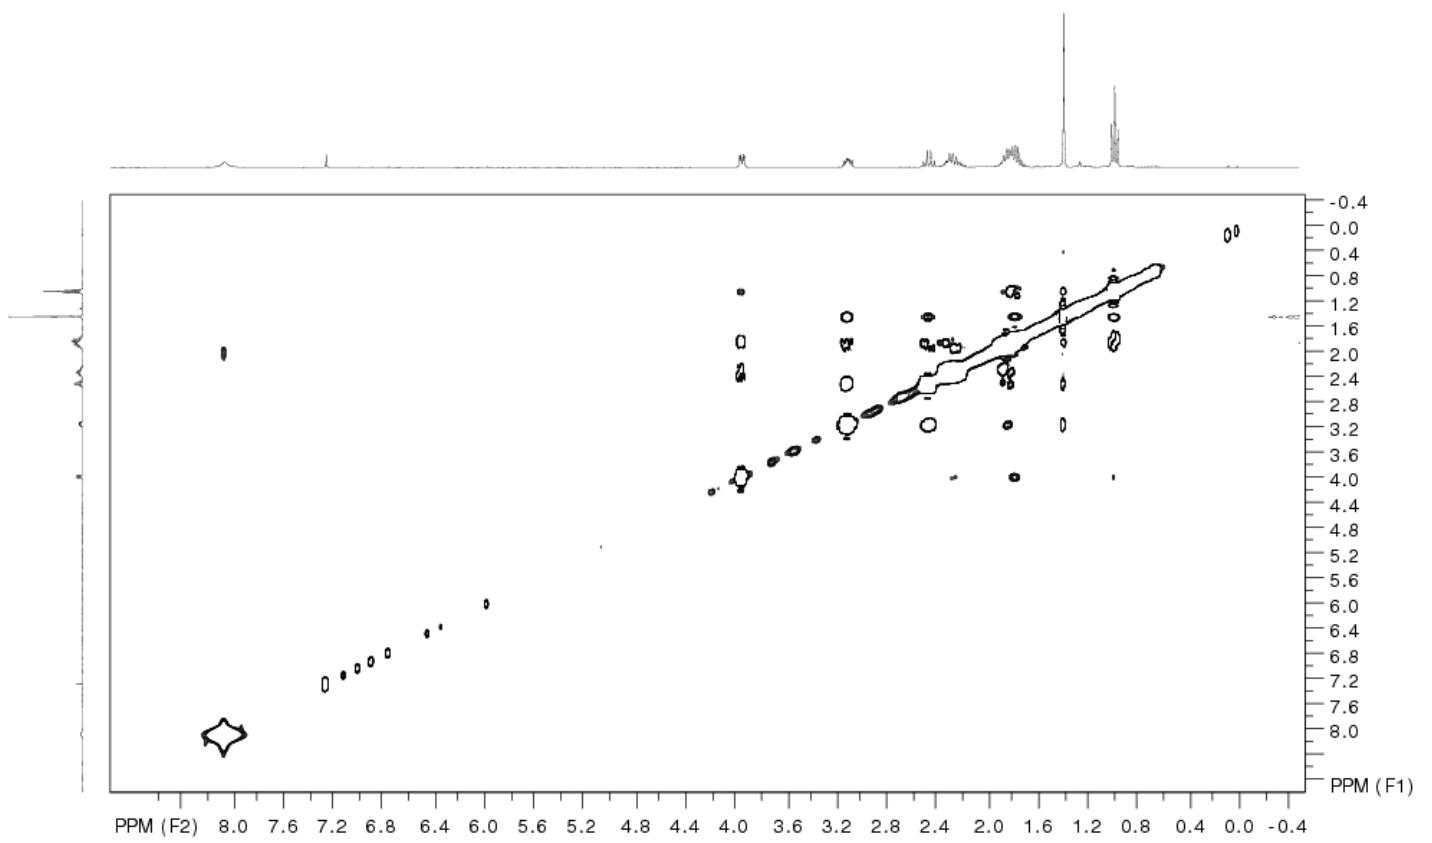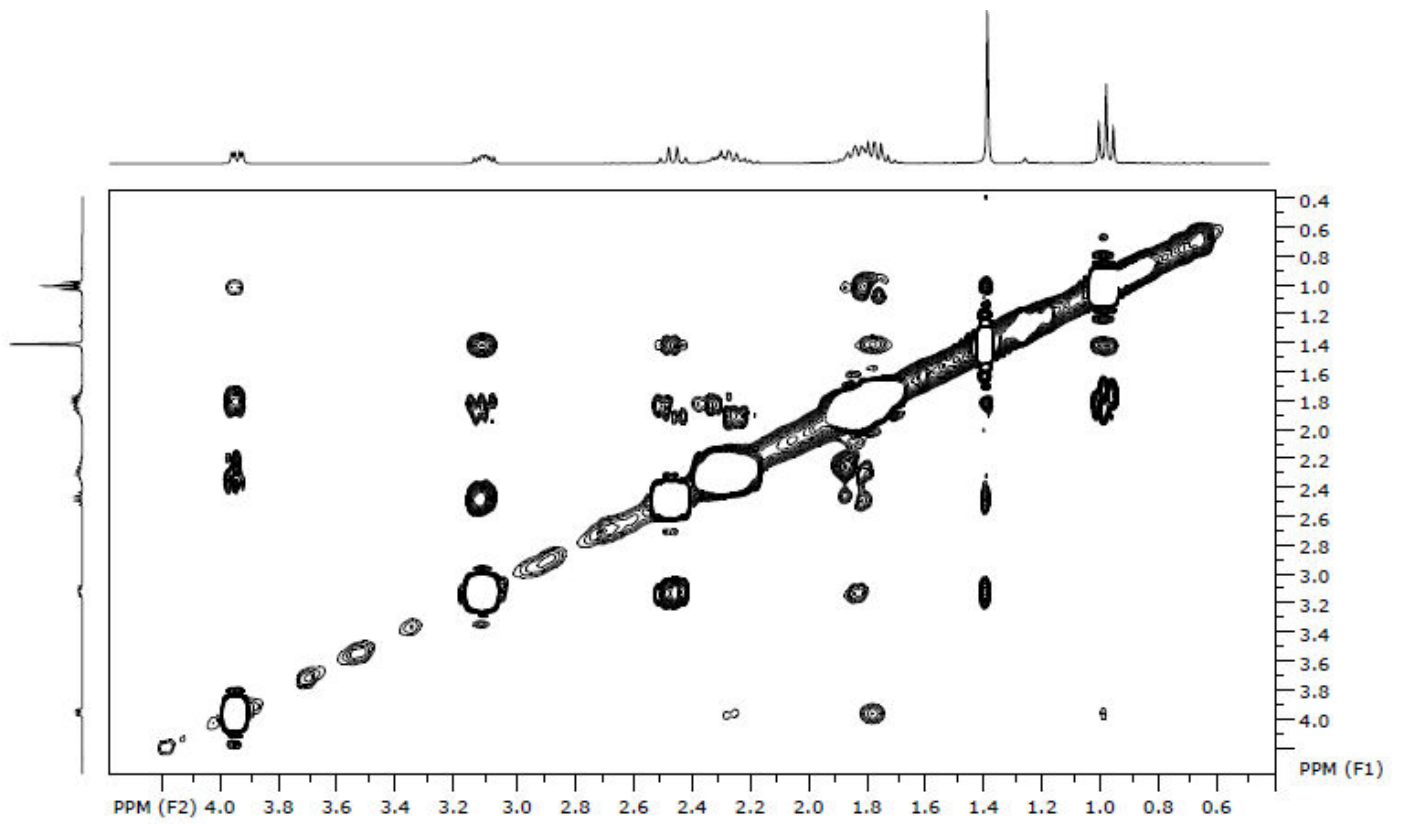

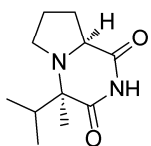

(4*R*,8*aS*)-3v

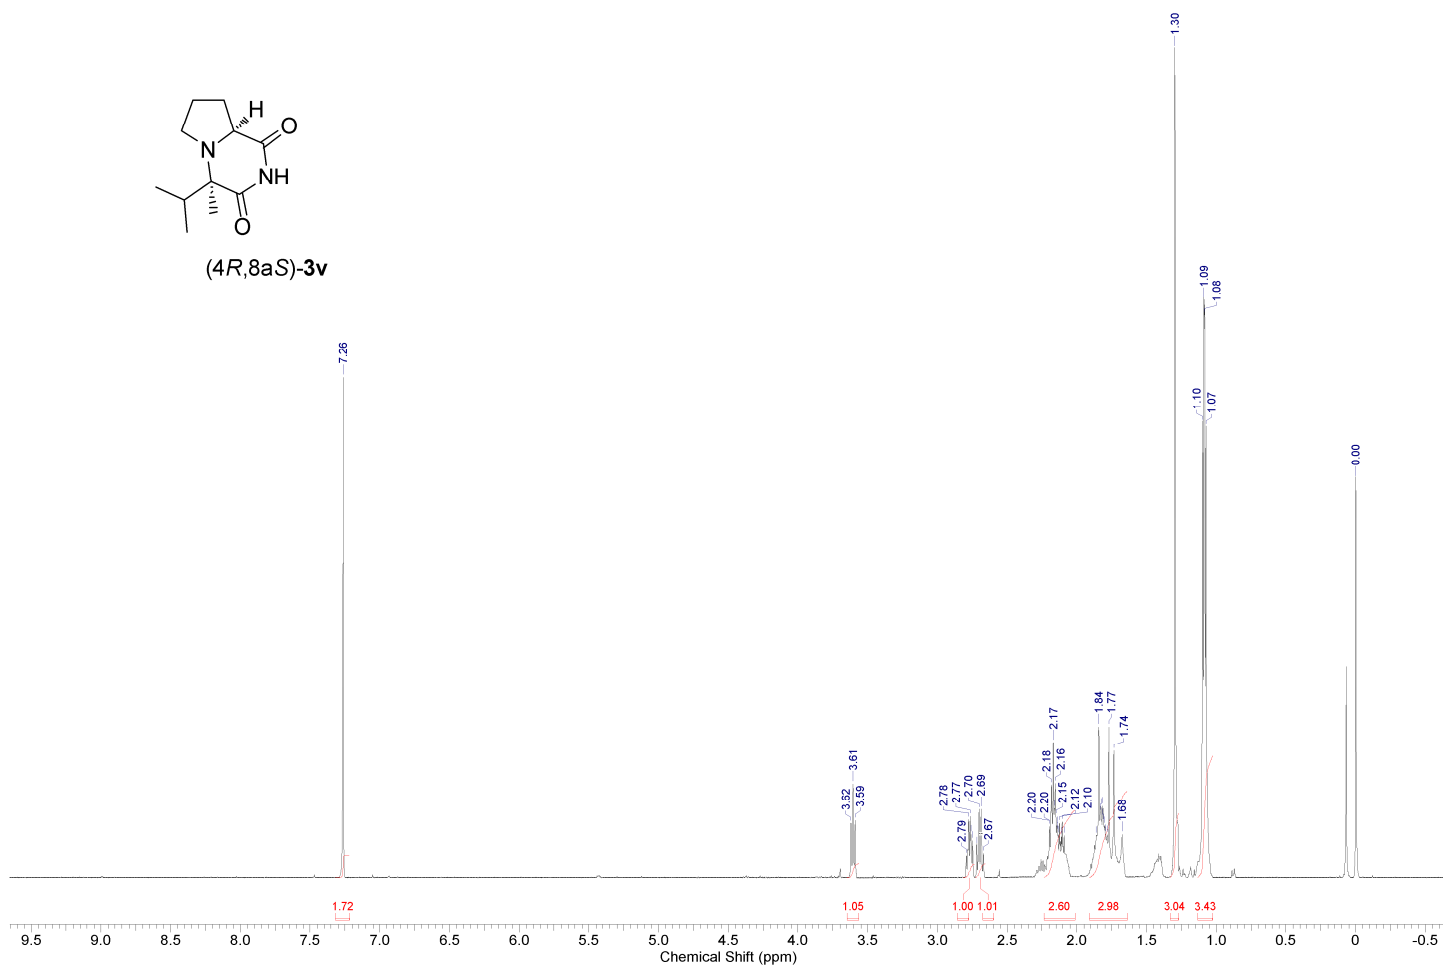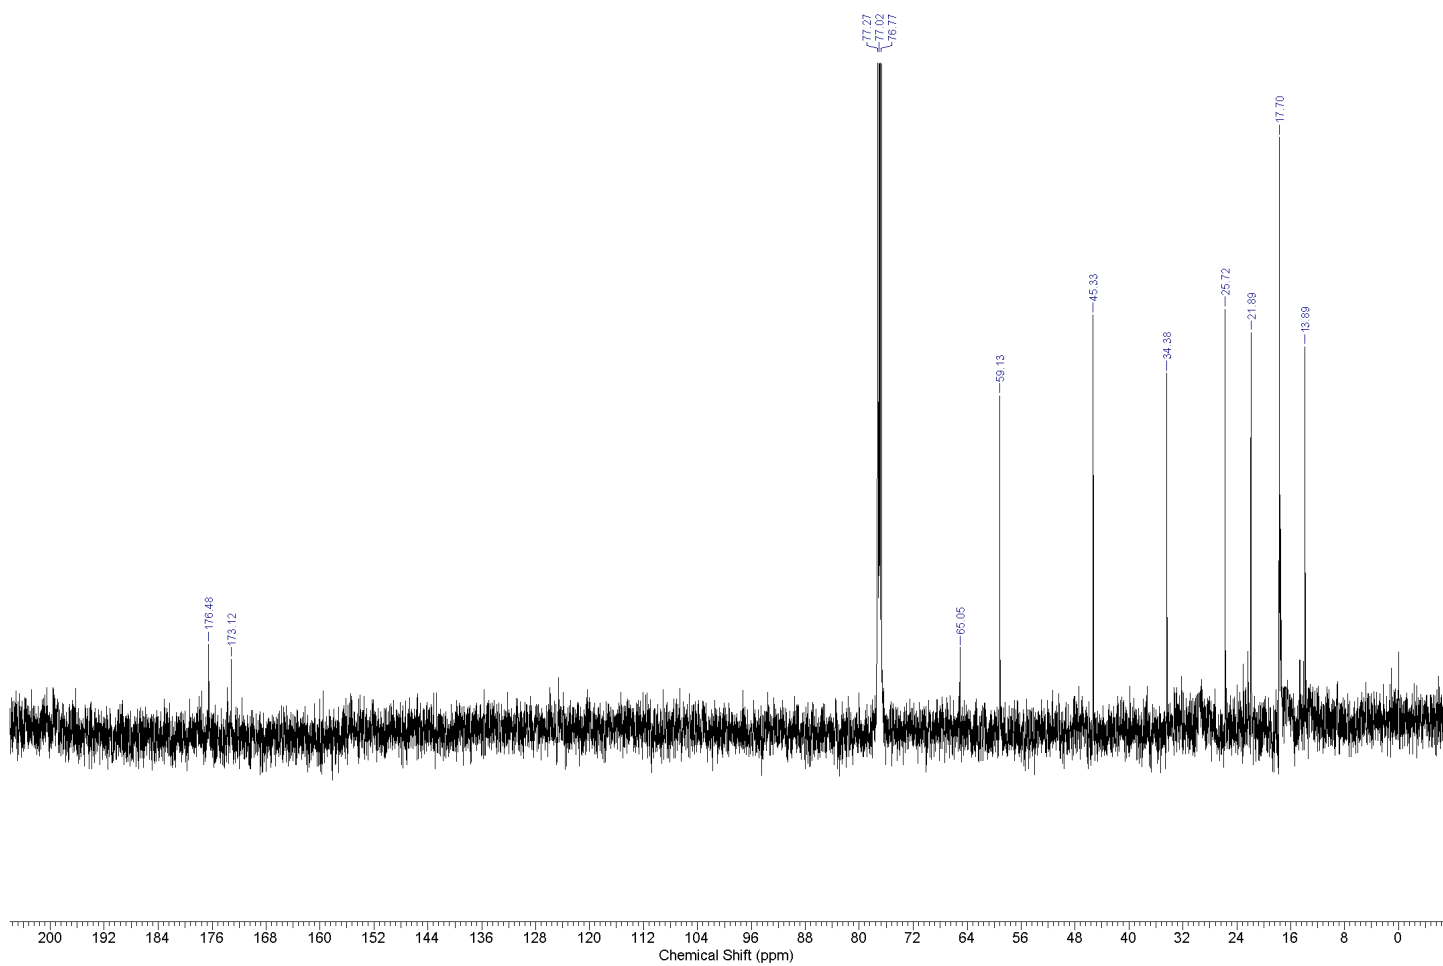

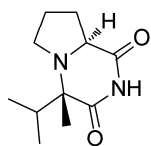

(4S,8aS)-3v

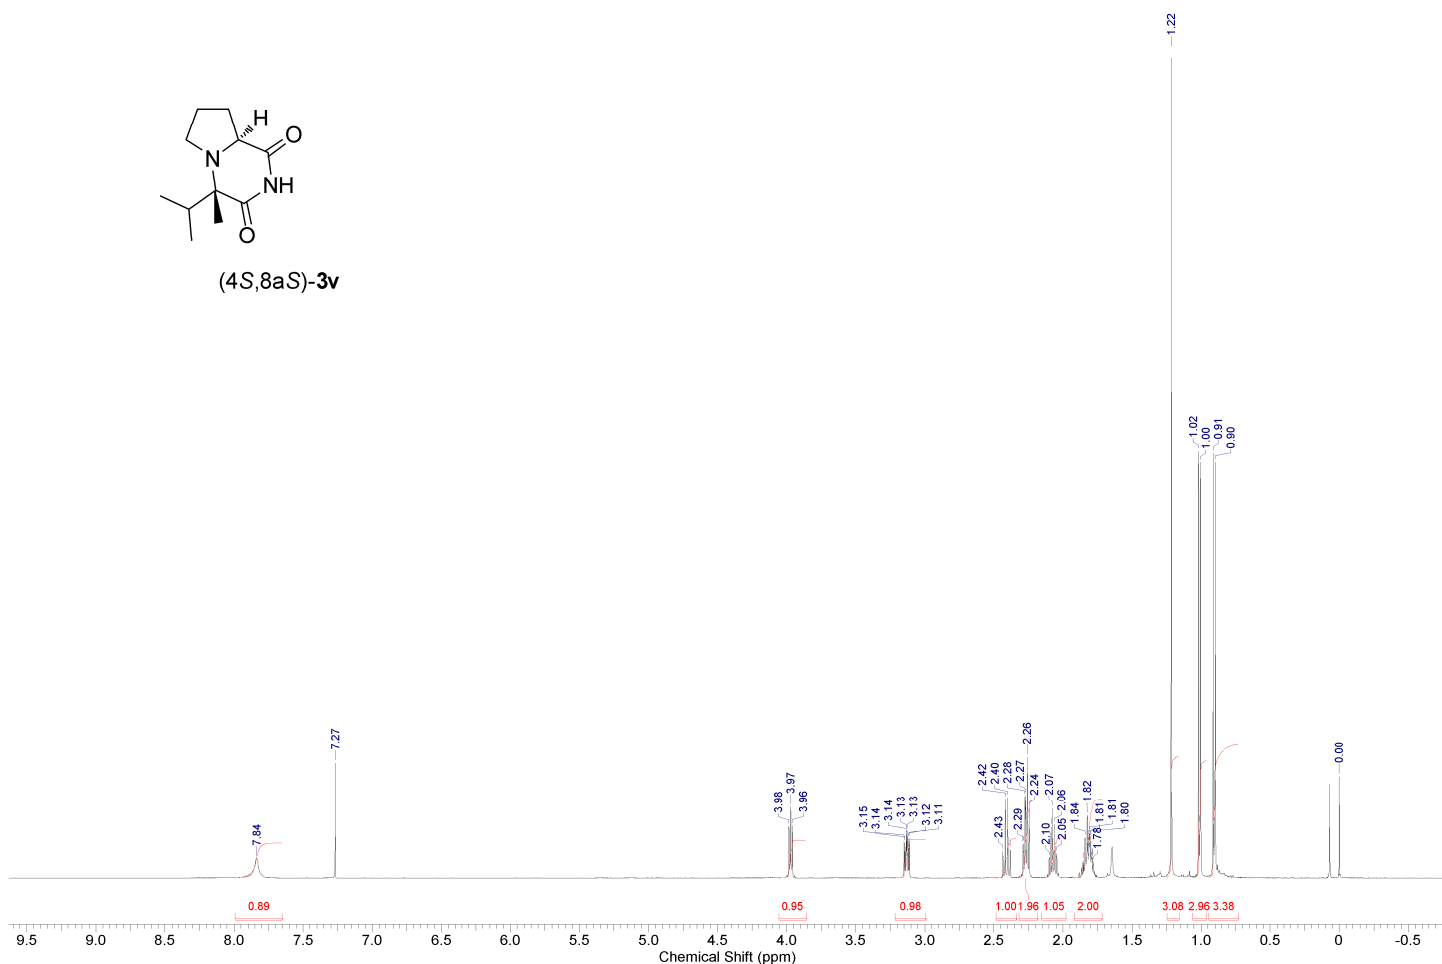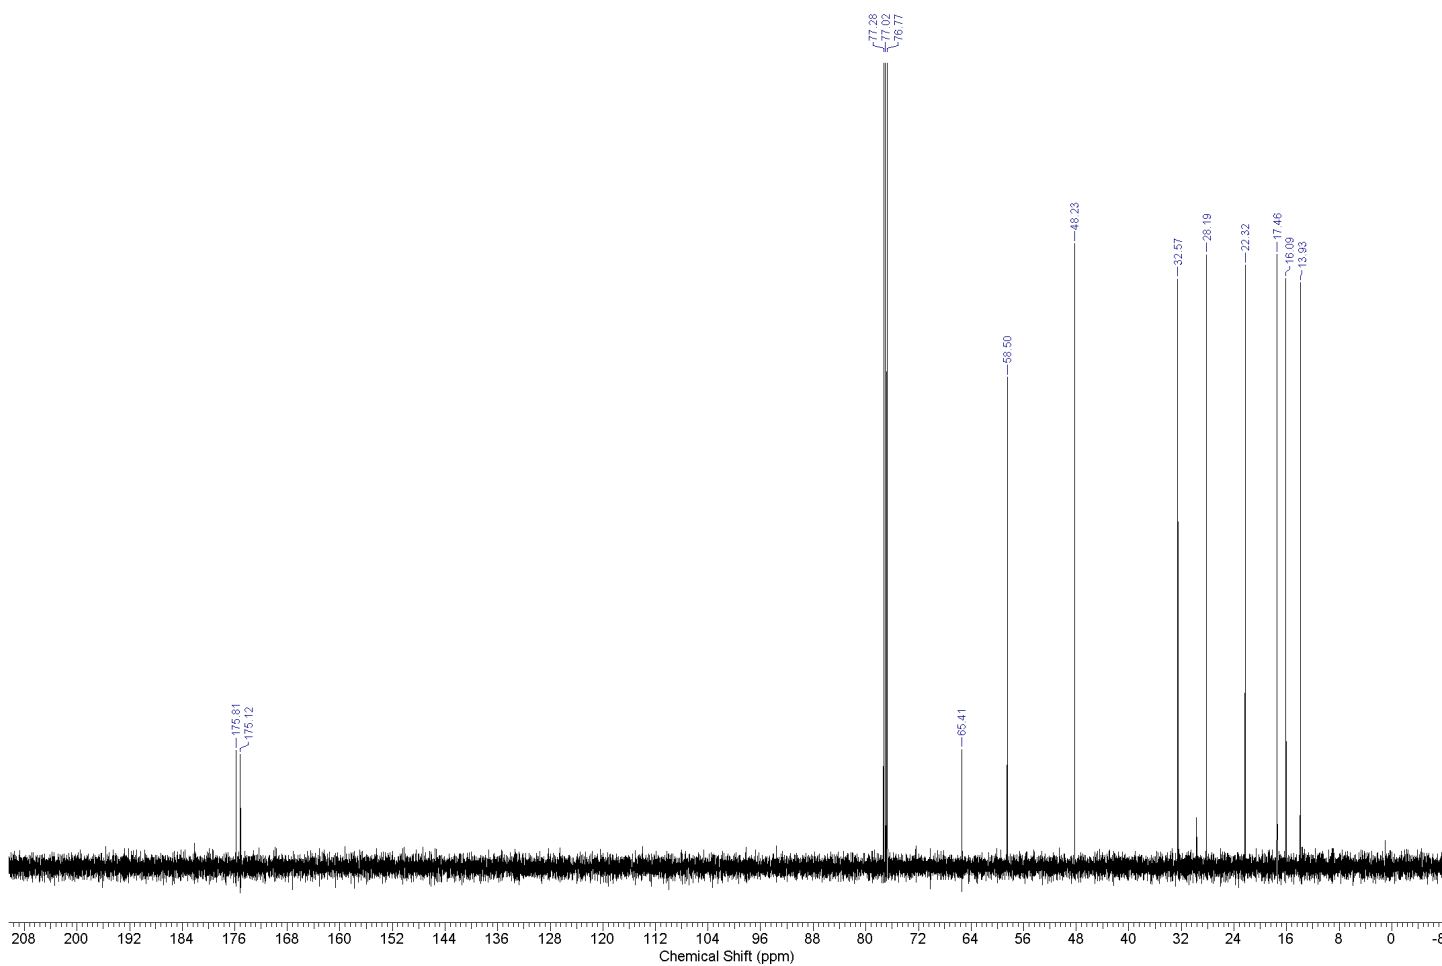

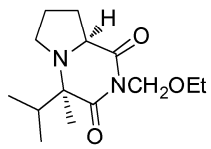

(4*R*,8*aS*)-3*x*

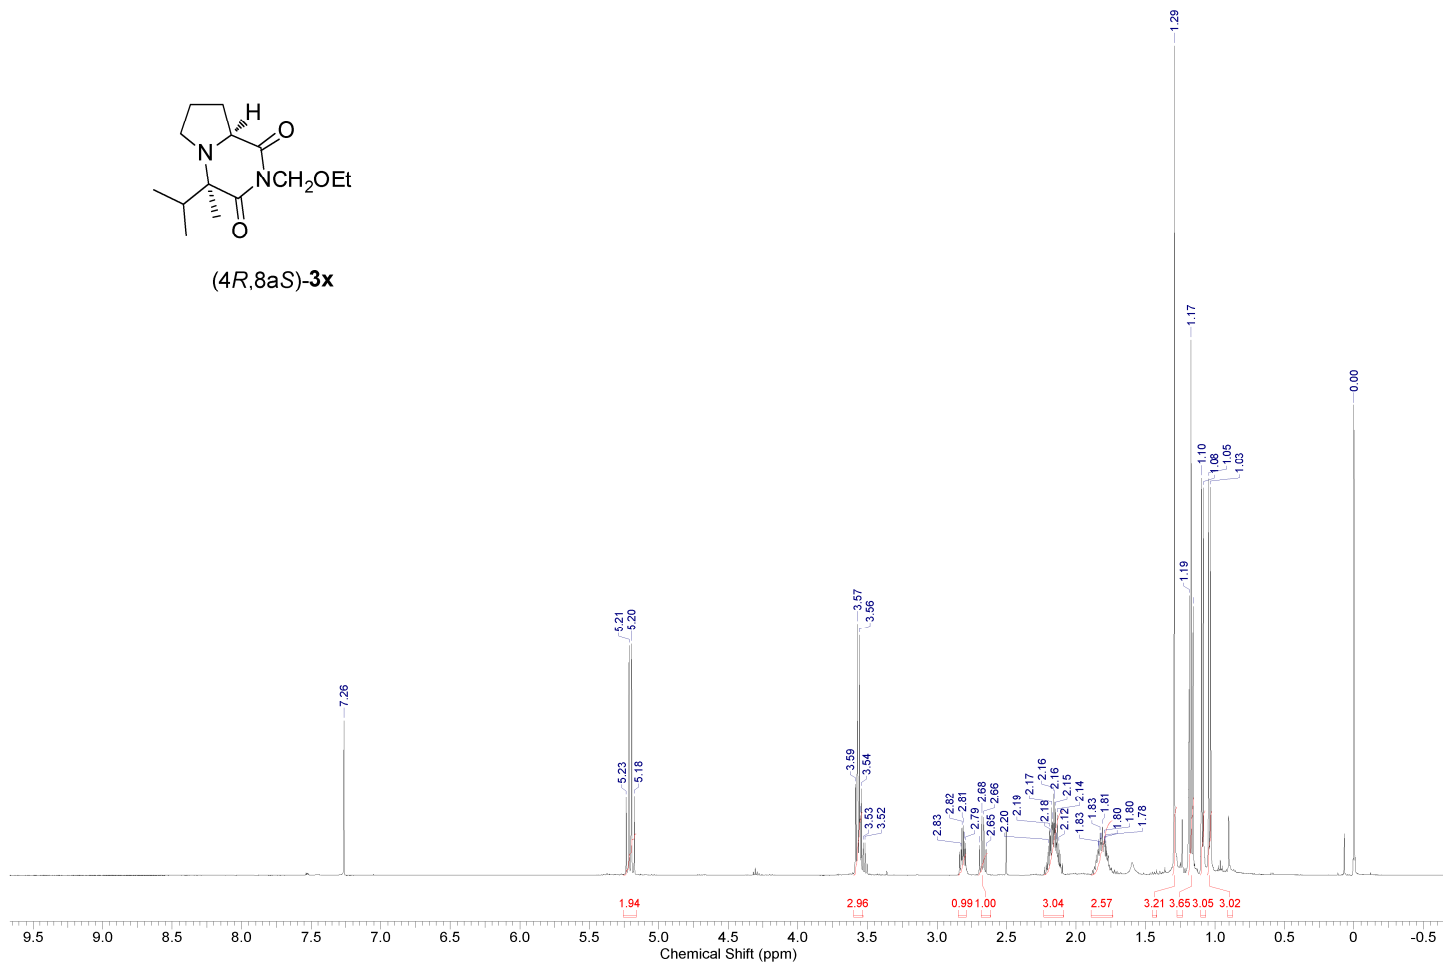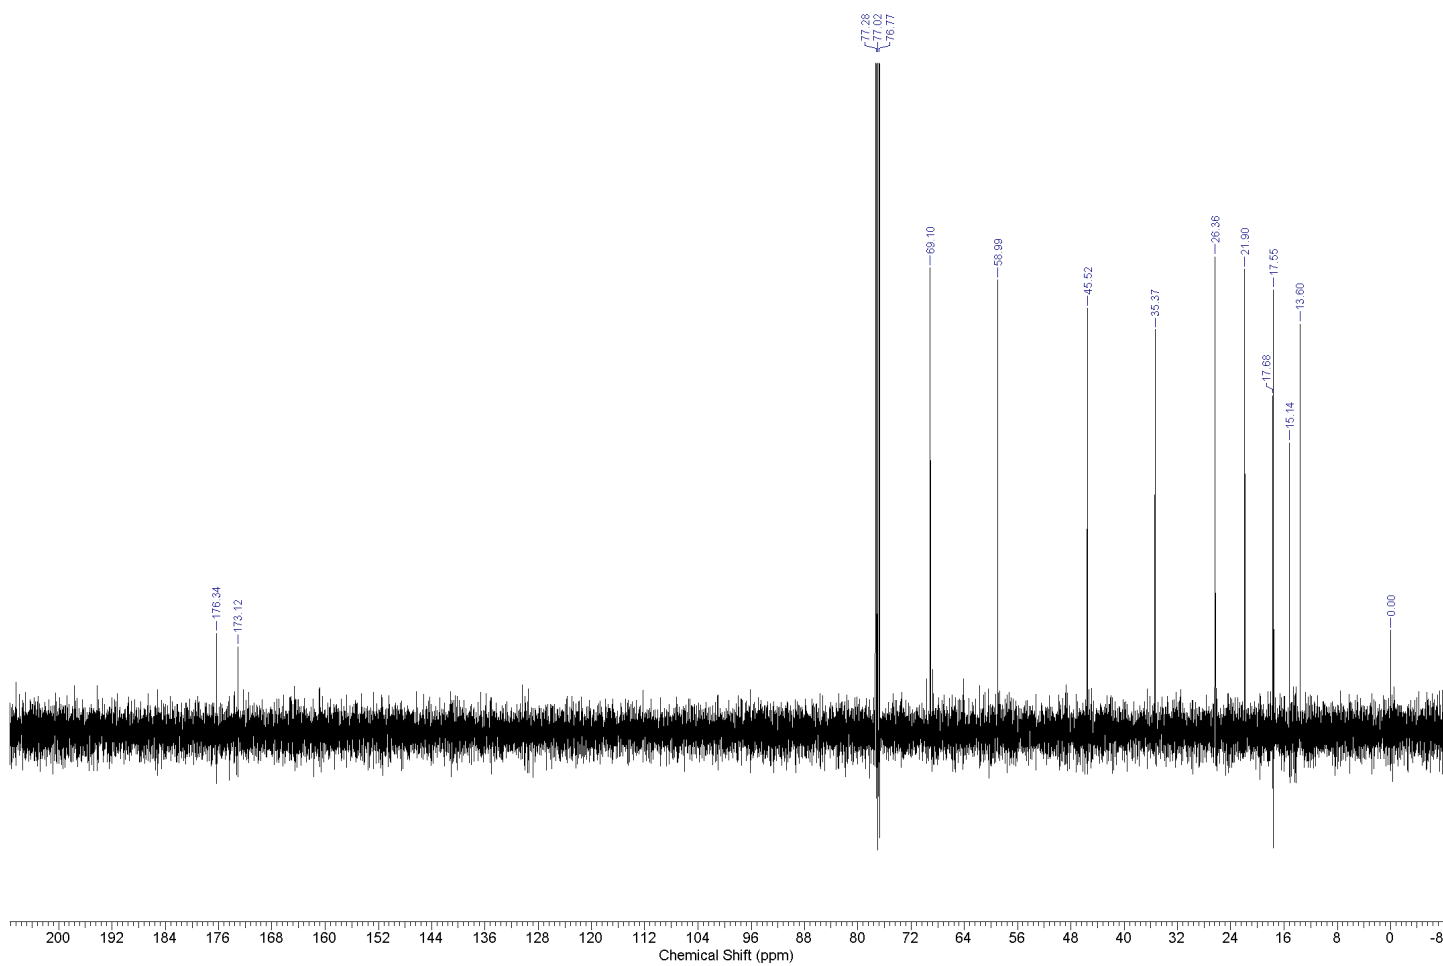

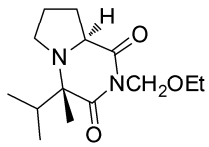

(4S,8aS)-3x

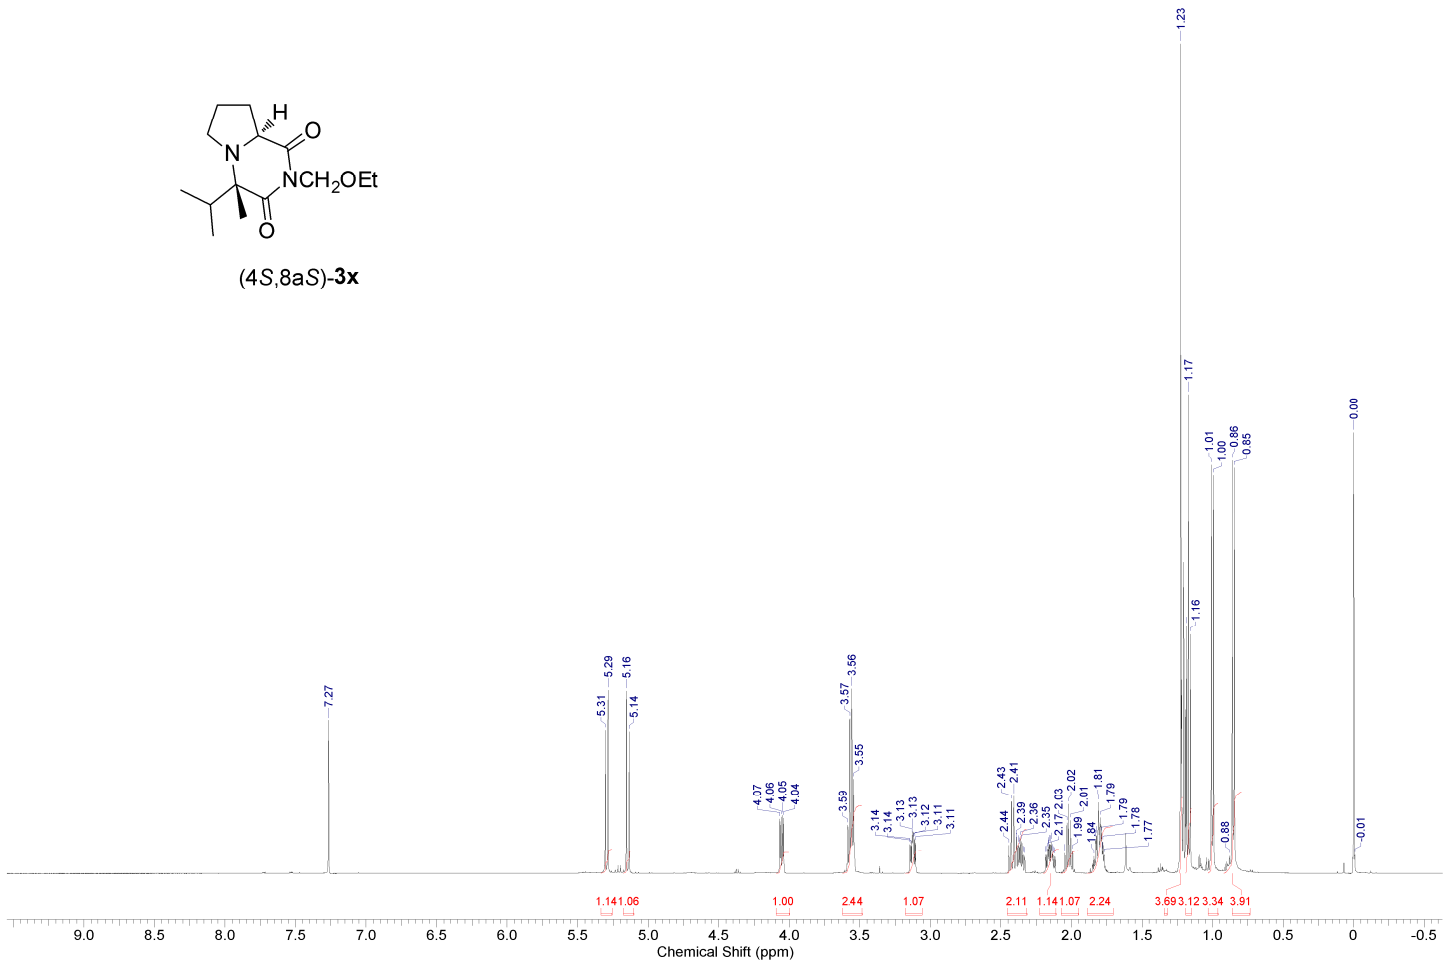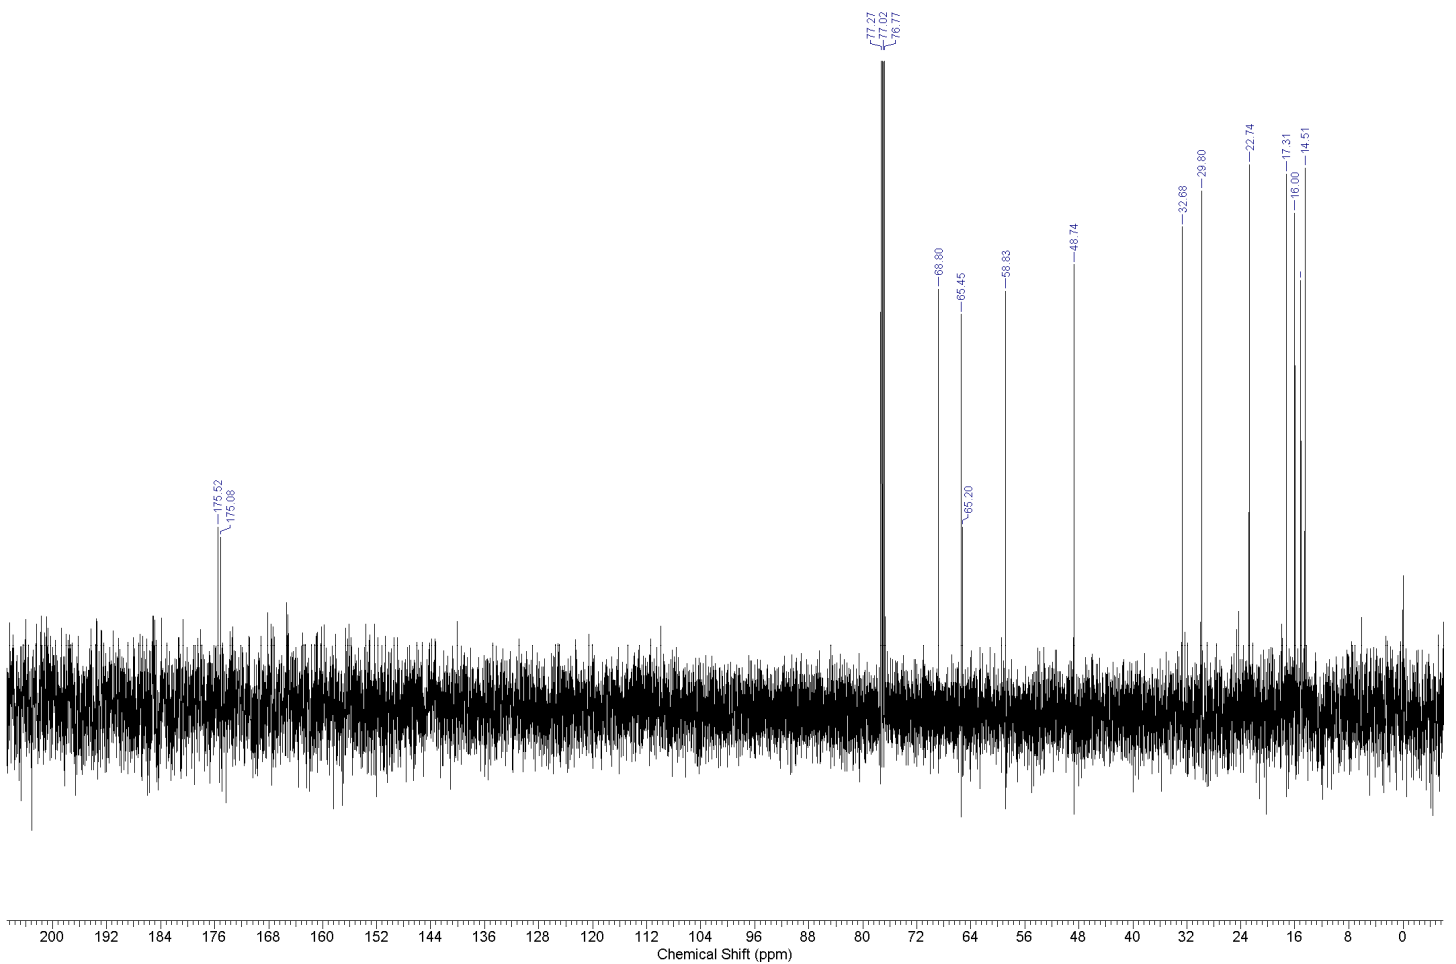

Supplement: 11030_2013_9488_MOESM1_ESM.pdf [file 11030_2013_9488_MOESM1_ESM.pdf]
